# Supplementary material for: Assembly-free single-molecule sequencing recovers complete virus genomes from natural microbial communities
Source: HighWire-hosted journal article supplement (doi:10.1101/gr.251686.119), 2020-02-19
Supplement: Supplementary_Table_S1.xlsx [file Supplementary_Table_S1.xlsx]

## Sheet: all_phage.pilon.info_table
								Nanopore-only					Nanopore + Pilon
Accession	Depth (m)	Read	Alignment cluster ID	Circularly permuted	Length (bp)	DTR length (bp)	GC content	# polishing reads	# CDS	CDS mean length (bp)	CDS length sum (bp)	CDS genome fraction	# CDS	CDS mean length (bp)	CDS length sum (bp)	CDS genome fraction
AFVG_25M1	25	5b8f43ef-c5a7-4592-9508-232fefd8872b	1002_3	FALSE	59623	328	0.359	13	126	399.9	50388	0.84	101	555.03	56058	0.940208
AFVG_25M2	25	9105b9f3-8fcd-4aa3-8554-4b6fdc836dfa	1004_3	FALSE	42195	2012	0.365	13	84	408.64	34326	0.81	72	532.417	38334	0.908496
AFVG_25M3	25	e7499c3f-07dd-4c83-b73a-f93113197776	1006_2	FALSE	43775	138	0.419	23	64	635.58	40677	0.93	55	750	41250	0.942319
AFVG_25M4	25	09dbe048-ff76-4072-b3b0-e9efde97960e	100_1	FALSE	36824	178	0.359	21	46	714.65	32874	0.89	41	829.683	34017	0.923773
AFVG_25M5	25	2f3e695d-386e-4b80-9765-b6a0a3f49f7d	1012_2	FALSE	37767	138	0.361	30	54	633.67	34218	0.91	50	692.34	34617	0.916594
AFVG_25M6	25	80fe821d-fab6-4055-abf1-781012e2313f	1014_1	FALSE	39690	244	0.37	14	80	389.62	31170	0.78	71	490.183	34803	0.876871
AFVG_25M7	25	b7bd9274-a4bc-432e-b1bd-b67de51ebc44	1017_2	FALSE	55116	2896	0.354	13	141	317.68	44793	0.81	125	388.8	48600	0.881777
AFVG_25M8	25	d1ebb9a7-19eb-4dd2-a7ef-ab5b56bd6be5	1017_3	FALSE	54871	2898	0.354	21	117	375.62	43947	0.8	109	448.211	48855	0.890361
AFVG_25M9	25	4c1d6953-fda9-4e97-a380-d80f325d42ca	1018_2	FALSE	59808	2647	0.37	12	111	444.7	49362	0.83	92	596.543	54882	0.917636
AFVG_25M10	25	d3d48cf6-1300-438a-b9cf-0de2f13cfa41	1019_1	TRUE	59834	2285	0.368	21	108	475.28	51330	0.86	93	572.968	53286	0.890564
AFVG_25M11	25	dc4b7667-f12d-4443-a548-8aee70bb312e	1019_4	FALSE	59548	2554	0.368	22	118	456.69	53889	0.9	93	599.871	55788	0.936858
AFVG_25M12	25	0e408b1f-5a0c-4c3e-9ae2-7d13ac6d9f05	1021_1	FALSE	43662	137	0.42	51	56	713.95	39981	0.92	52	786.808	40914	0.937062
AFVG_25M13	25	7ee75375-b23e-453e-9fb8-ae1fbbfe4e99	1025_3	FALSE	36313	150	0.379	15	54	611.94	33045	0.91	43	789.279	33939	0.934624
AFVG_25M14	25	999b6e2f-9f49-4249-922d-148452f48ad3	1028_3	FALSE	33601	259	0.391	73	49	634.59	31095	0.92	48	654.188	31401	0.934526
AFVG_25M15	25	7176f1aa-e9e1-4caf-823b-6fb3fd977a94	1031_1	TRUE	33411	1488	0.303	60	80	374.25	29940	0.9	72	436.792	31449	0.941277
AFVG_25M16	25	d41c6f49-3e85-491b-91ff-c459da9f1114	1031_2	TRUE	33373	1463	0.303	30	83	351.51	29175	0.87	76	397.855	30237	0.906032
AFVG_25M17	25	f240a147-414d-487f-9865-e14fe6ad85da	103_2	FALSE	38441	202	0.381	28	49	717.24	35145	0.91	39	927.385	36168	0.94087
AFVG_25M18	25	6a17e408-0188-40de-a094-014c132d8dfd	1040_1	FALSE	57368	230	0.348	14	80	655.16	52413	0.91	67	817.567	54777	0.954835
AFVG_25M19	25	8859ac07-4c80-4610-8c19-8dbc69366fb1	1044_2	FALSE	38663	332	0.363	15	63	520.33	32781	0.85	55	638.018	35091	0.907612
AFVG_25M20	25	cf9c426c-298f-4260-91ca-de676d180ef7	1045_1	FALSE	39038	333	0.361	23	62	542.32	33624	0.86	56	636.161	35625	0.912572
AFVG_25M21	25	45dd24eb-b8f0-44d7-a56c-cca37c971c70	1046_1	FALSE	51902	335	0.47	22	83	578.64	48027	0.93	69	718.391	49569	0.95505
AFVG_25M22	25	ea9e68c6-ceb2-4fda-bbe1-47630cf3bcc7	104_1	FALSE	37843	202	0.382	56	54	639.83	34551	0.91	44	832.841	36645	0.968343
AFVG_25M23	25	ac66ac83-fd7f-4587-8d84-b339c5340bbc	1050_1	FALSE	35693	186	0.381	13	61	525	32025	0.9	55	581.345	31974	0.895806
AFVG_25M24	25	995d5a70-e85a-4158-b907-477531a3cb3c	1053_1	FALSE	61178	194	0.454	11	106	451.02	47808	0.78	77	731.455	56322	0.920625
AFVG_25M25	25	01173ae9-3b28-4956-9d30-8ffdc8d9dd3d	1054_1	FALSE	35876	142	0.379	23	52	633.17	32925	0.92	45	768.8	34596	0.964322
AFVG_25M26	25	1f0f77eb-4770-430a-a344-85b33de26940	1056_1	FALSE	40148	334	0.369	38	61	572.8	34941	0.87	58	617.276	35802	0.891751
AFVG_25M27	25	e21ffdfd-2340-47e0-bce8-370f95266a23	1057_1	FALSE	32706	410	0.345	16	66	437.82	28896	0.88	51	613.765	31302	0.957072
AFVG_25M28	25	e55b3e07-4c32-418d-bd5a-164a2943e423	105_1	FALSE	37360	156	0.356	62	52	662.54	34452	0.92	46	768.457	35349	0.946172
AFVG_25M29	25	9f7868e2-587f-4691-82ce-d71fa69c5f53	1062_1	FALSE	55896	250	0.351	13	122	375.64	45828	0.82	82	650.012	53301	0.953574
AFVG_25M30	25	191a81db-9172-4d18-a294-82ff5f1a5505	1063_2	FALSE	31944	273	0.353	43	53	533.21	28260	0.88	52	571.038	29694	0.929564
AFVG_25M31	25	6c8a9c56-0d07-4092-8fee-8995337c2265	1064_5	FALSE	32537	240	0.354	12	63	446.43	28125	0.86	63	446.905	28155	0.865323
AFVG_25M32	25	612409a5-dc20-4b3e-8645-2e6290b40d53	1064_6	FALSE	32415	253	0.355	91	51	584.18	29793	0.92	50	601.2	30060	0.927348
AFVG_25M33	25	83d7c94b-893c-4f39-8bed-0ca2c0a2636a	1064_7	FALSE	32425	260	0.354	10	69	388.96	26838	0.83	68	394.5	26826	0.827325
AFVG_25M34	25	adbca45f-10da-4dfa-bf39-339407772295	1065_1	FALSE	41746	365	0.368	23	66	557.82	36816	0.88	66	576.682	38061	0.911728
AFVG_25M35	25	d3b5d461-5abb-4ce2-87db-af1572e4c57d	1066_1	FALSE	41811	374	0.373	10	80	398.59	31887	0.76	63	600.81	37851	0.905288
AFVG_25M36	25	558d38e9-9b0b-4ccd-804a-5fcf413af5b8	106_1	FALSE	36381	208	0.347	14	79	377.54	29826	0.82	59	578.797	34149	0.938649
AFVG_25M37	25	e5f9cd4c-cf09-4c6a-b779-6aa7431cb7c1	1073_2	FALSE	29671	369	0.371	24	57	498.68	28425	0.96	48	605.375	29058	0.97934
AFVG_25M38	25	305e5449-11ea-41f5-959e-7a88aac39959	1074_3	FALSE	38642	227	0.344	16	74	428.68	31722	0.82	57	607.526	34629	0.896149
AFVG_25M39	25	00114b92-554c-4cb2-a2d7-97aecd450c43	1078_1	FALSE	33642	316	0.396	25	57	501.47	28584	0.85	56	552.911	30963	0.920367
AFVG_25M40	25	6577f73b-3008-4de6-bcf6-6455a90a56ab	1080_1	FALSE	35300	232	0.341	11	71	375.38	26652	0.75	65	469.708	30531	0.864901
AFVG_25M41	25	a6be333b-9ee4-4109-95e9-767256200d31	1082_1	FALSE	37836	175	0.364	23	57	605.47	34512	0.91	52	671.019	34893	0.922217
AFVG_25M42	25	b6301b7a-429d-4b73-86ae-cae4265012a2	1083_1	FALSE	37740	172	0.362	23	55	617.73	33975	0.9	51	673.353	34341	0.909936
AFVG_25M43	25	eb97652f-08b9-4aa2-ad32-f50d174e5e57	1086_2	FALSE	36486	173	0.329	11	75	399.52	29964	0.82	51	678.824	34620	0.948857
AFVG_25M44	25	abf7fd93-476a-473a-a85d-7c3cdbce3f82	1087_2	FALSE	36451	257	0.313	10	88	305.28	26865	0.74	70	487.329	34113	0.935859
AFVG_25M45	25	d7359f60-ed57-422e-a5cc-c02285d70d8f	1088_5	FALSE	38151	246	0.36	24	66	501.91	33126	0.87	63	544.048	34275	0.898404
AFVG_25M46	25	187ce00d-2cb1-4017-a3f5-9669898c6087	109_4	TRUE	28036	722	0.487	33	50	517.86	25893	0.92	47	572.745	26919	0.960158
AFVG_25M47	25	ddfbebd3-8109-444a-b449-01960f5b7fd8	1105_1	FALSE	61753	2283	0.371	14	109	496.76	54147	0.88	94	605.745	56940	0.92206
AFVG_25M48	25	1aba9ef7-462b-4e87-a4c0-380bd775f44f	1110_1	FALSE	58970	3768	0.367	14	123	366.66	45099	0.76	96	547.688	52578	0.891606
AFVG_25M49	25	bd41a94e-f8b3-46c7-a98b-36092efa510e	1115_1	FALSE	39523	324	0.366	38	62	571.16	35412	0.9	61	593.164	36183	0.915492
AFVG_25M50	25	1ec9585e-0832-44cf-b7a2-248e0722d8f2	1116_1	FALSE	39446	333	0.367	58	62	567.87	35208	0.89	62	575.758	35697	0.904959
AFVG_25M51	25	a1996cfd-0fa6-447c-9b22-32a005a2645a	1117_2	FALSE	34401	302	0.333	10	74	398.31	29475	0.86	60	541.8	32508	0.944973
AFVG_25M52	25	af8501e9-ea51-4f16-a17e-e81159765007	1118_1	FALSE	34635	310	0.33	16	76	397.74	30228	0.87	60	555.5	33330	0.962321
AFVG_25M53	25	9ad725c2-825a-459f-bd06-e67df586e671	111_1	FALSE	33349	286	0.334	24	68	446.29	30348	0.91	58	554.948	32187	0.965156
AFVG_25M54	25	956e8faa-709f-47d3-8042-c554da91e41b	1127_3	FALSE	34485	221	0.506	31	56	518.68	29046	0.84	40	744.3	29772	0.863332
AFVG_25M55	25	7846a9e4-c748-4770-a9ba-48114c7c4fcd	1130_1	FALSE	42032	248	0.358	12	85	410.4	34884	0.83	69	543.043	37470	0.891464
AFVG_25M56	25	a260b24f-6f53-4f2c-b350-871181606293	1133_1	FALSE	60397	2347	0.372	27	126	415.52	52356	0.87	86	659.337	56703	0.938838
AFVG_25M57	25	ff765462-428f-4827-be3d-6b911abb21bb	1135_3	FALSE	38517	485	0.34	23	79	420.23	33198	0.86	73	478.808	34953	0.907469
AFVG_25M58	25	15e60298-ba4c-4d7d-aed1-fe19fb101326	1135_4	FALSE	38863	484	0.34	29	77	449.49	34611	0.89	76	471.434	35829	0.921931
AFVG_25M59	25	649aa1a3-9539-4967-a172-eb6886e052c2	1138_1	FALSE	57643	2389	0.412	33	92	566.18	52089	0.9	83	652.482	54156	0.939507
AFVG_25M60	25	9a7c11a6-a79d-4db6-889c-93d1277f38d8	1147_1	FALSE	60459	293	0.345	12	155	284.67	44124	0.73	117	492.923	57672	0.953903
AFVG_25M61	25	87898ca1-7dc3-4ac9-a774-4146fda1fd98	1148_1	FALSE	37064	336	0.368	15	69	455.78	31449	0.85	59	572.339	33768	0.911073
AFVG_25M62	25	d9b4229c-b838-41e5-adc8-f1d47d9261ae	1152_1	FALSE	59143	2650	0.379	21	110	473.97	52137	0.88	92	590.707	54345	0.918875
AFVG_25M63	25	619f1f7d-46f4-4efc-90a4-ec774a3176d3	1157_2	FALSE	65241	502	0.327	14	126	464.21	58491	0.9	82	761.744	62463	0.957419
AFVG_25M64	25	c5b168db-b45c-4c53-bb07-d84d80b0e3a5	1160_1	FALSE	39834	337	0.367	48	66	552	36432	0.91	64	574.594	36774	0.923181
AFVG_25M65	25	92c8e95a-cf6d-4437-9ad3-5b81f1f896c3	116_1	FALSE	55614	222	0.35	11	120	391.62	46995	0.84	88	593.795	52254	0.939584
AFVG_25M66	25	fd311c39-9b89-4f60-bc01-da39aa93de40	1172_2	FALSE	40094	342	0.341	10	80	359.89	28791	0.72	75	480.04	36003	0.897965
AFVG_25M67	25	a753fbc5-3860-4acf-92a7-9df5e87e7b38	1176_1	FALSE	46322	140	0.404	12	88	482.05	42420	0.92	61	727.574	44382	0.958119
AFVG_25M68	25	ada4554c-ff17-4a9e-9c45-5917e2a07c49	1177_1	FALSE	56616	321	0.475	14	96	492.22	47253	0.83	79	669.19	52866	0.933764
AFVG_25M69	25	dfcaaa0a-12e1-45a0-9339-4e816d714f57	1178_2	FALSE	36802	483	0.337	14	84	351.75	29547	0.8	71	472.014	33513	0.91063
AFVG_25M70	25	151c7173-8f00-4388-be77-6a64e9019d82	1179_2	FALSE	37076	490	0.338	42	70	466.2	32634	0.88	65	524.538	34095	0.919598
AFVG_25M71	25	c544fde7-99df-439e-b9fc-f10615a853c6	117_1	FALSE	53993	254	0.355	17	95	497.65	47277	0.88	88	574.295	50538	0.93601
AFVG_25M72	25	2769a237-024e-4cf3-9f62-7da9db5cd41d	117_3	FALSE	54723	255	0.356	20	93	533.65	49629	0.91	83	623.494	51750	0.945672
AFVG_25M73	25	dbeec733-8fd6-4ee8-ada9-6673e1d476d8	1185_1	FALSE	59971	976	0.457	16	101	546.56	55203	0.92	82	698.341	57264	0.954862
AFVG_25M74	25	4fbcf7d7-b4a7-454e-a313-a9d1f88f518f	119_8	FALSE	36177	282	0.454	113	50	661.98	33099	0.91	50	672.84	33642	0.929928
AFVG_25M75	25	f91f2cca-d22c-4227-b573-12bbbfe81a23	11_2	FALSE	32189	279	0.346	58	50	606.36	30318	0.94	48	634.75	30468	0.946535
AFVG_25M76	25	66fd870f-ca41-4f4f-bed8-d47d0dcc9179	11_4	FALSE	31986	278	0.347	24	50	600.48	30024	0.94	49	613.286	30051	0.939505
AFVG_25M77	25	807d3b77-91e8-4d0c-9894-28bc55af9a1c	1200_2	FALSE	59138	3327	0.356	27	113	452.58	51141	0.86	99	553.091	54756	0.925902
AFVG_25M78	25	4ca80d16-fd64-46f1-9a1a-96fc5b359aaf	1206_1	FALSE	39760	233	0.342	14	81	418.07	33864	0.85	73	497.507	36318	0.913431
AFVG_25M79	25	2aabfeeb-244c-4462-8666-a1dba4967570	1207_1	FALSE	39180	236	0.344	14	81	395.52	32037	0.82	76	467.408	35523	0.906662
AFVG_25M80	25	1a4b2155-9478-48a5-8397-cb11c47d8c18	1218_2	FALSE	63234	2214	0.38	16	111	474.46	52665	0.83	96	591.938	56826	0.898662
AFVG_25M81	25	5198c68b-f243-4f24-b8cf-b9d0283f2089	1219_2	FALSE	63549	4042	0.363	13	119	430.56	51237	0.81	96	600.281	57627	0.906812
AFVG_25M82	25	3c8e0da3-bb0f-4d78-9fc6-2d876836b50d	121_1	FALSE	31314	419	0.479	12	58	391.71	22719	0.72	45	610.267	27462	0.876988
AFVG_25M83	25	169a9ccd-6617-45a1-b80d-32e16f62c5bc	1220_1	FALSE	62932	3945	0.366	18	120	463.82	55659	0.88	103	566.184	58317	0.926667
AFVG_25M84	25	916fc797-b6e3-4edb-8090-7bf4254d2925	1224_1	FALSE	62587	3047	0.366	16	115	484.15	55677	0.89	106	547.585	58044	0.927413
AFVG_25M85	25	a81e0de9-0a1c-4308-8fbf-f1733249056f	1224_2	FALSE	62634	3073	0.367	11	129	400.7	51690	0.83	106	524.151	55560	0.887058
AFVG_25M86	25	0c3c4d5a-545c-43d5-b406-1f28722c6c30	1226_1	TRUE	59555	3129	0.358	11	123	369.27	45420	0.76	106	503.264	53346	0.895743
AFVG_25M87	25	c45ce51e-5522-445f-b1d0-b408088df63f	1229_1	FALSE	62737	3029	0.365	22	114	490.97	55971	0.89	100	577.74	57774	0.920892
AFVG_25M88	25	9584adf6-630b-46e1-aa9a-c777bd6d79d1	122_1	FALSE	52198	337	0.507	15	78	578.31	45108	0.86	68	720.309	48981	0.938369
AFVG_25M89	25	0c3b447d-3e6a-4974-bd83-19ac277ace0f	1232_1	FALSE	37055	413	0.338	33	74	443.35	32808	0.89	69	498.739	34413	0.928701
AFVG_25M90	25	fe09aa04-a6d7-4661-9ea7-edac0c53f276	1234_1	FALSE	61799	3045	0.36	10	142	355.48	50478	0.82	109	504.578	54999	0.889966
AFVG_25M91	25	4acd6e32-e8f2-4db3-8f6a-c2f7527634de	1235_2	FALSE	61473	3265	0.357	14	124	401.71	49812	0.81	104	537.029	55851	0.908545
AFVG_25M92	25	dc16e30e-4eb4-4599-bda9-fb9ef1c465a3	1242_1	FALSE	36827	262	0.343	17	83	366.14	30390	0.82	70	482.486	33774	0.917099
AFVG_25M93	25	f5ef2cf0-b624-4173-959e-b4d450eeb74e	1243_2	FALSE	36928	422	0.341	32	80	395.7	31656	0.86	73	459.411	33537	0.908173
AFVG_25M94	25	2849d751-d0e3-4e90-a328-771f602d0cca	1244_1	FALSE	58504	310	0.328	17	133	336.14	44706	0.76	93	587.452	54633	0.933834
AFVG_25M95	25	861b4a3a-9d91-4c1e-a6cb-0b810ae8dbc9	1252_1	FALSE	40400	339	0.342	25	80	465.3	37224	0.92	75	504.04	37803	0.935718
AFVG_25M96	25	13c9cf79-7806-4aa1-af3b-190080bac578	1253_1	FALSE	40152	246	0.339	10	89	341.02	30351	0.76	69	531	36639	0.912507
AFVG_25M97	25	d262159d-f344-436c-a356-f2fd270d7e8f	1255_4	FALSE	32678	141	0.308	13	75	374.48	28086	0.86	67	457.746	30669	0.938521
AFVG_25M98	25	018faa87-5fa4-4fef-8315-5affc0ea4e6c	1264_1	FALSE	63443	2477	0.353	15	136	407.03	55356	0.87	105	565.143	59340	0.935328
AFVG_25M99	25	0785f33f-19a6-4f24-b7eb-9bfbefdb2e70	1267_1	FALSE	58321	372	0.353	15	144	286.29	41226	0.71	104	520.875	54171	0.928842
AFVG_25M100	25	73cc2496-5384-47da-bf31-32a8db20f414	1269_3	FALSE	33365	333	0.319	31	75	362.08	27156	0.81	54	570.111	30786	0.922703
AFVG_25M101	25	12ee797c-7876-4065-baa6-20918eec7b0e	1292_4	FALSE	33274	219	0.321	16	72	340.33	24504	0.74	60	510.75	30645	0.920989
AFVG_25M102	25	becc2532-f9fc-46ca-a16f-e16ec10e0db9	1296_1	FALSE	30196	447	0.354	17	59	396.46	23391	0.77	43	644.791	27726	0.918201
AFVG_25M103	25	a6870dcf-cb8f-4ae6-86ed-fa8f50c356c5	12_2	FALSE	58082	209	0.366	24	97	527.91	51207	0.88	80	687.375	54990	0.946765
AFVG_25M104	25	6044a7a5-195d-4d63-9942-21a30f6b1100	130_2	FALSE	38243	228	0.339	41	63	539.05	33960	0.89	53	679.302	36003	0.941427
AFVG_25M105	25	8d57049b-bace-41d6-8c9a-5a38eaf0e59b	131_2	FALSE	38095	230	0.34	23	70	454.07	31785	0.83	53	646.925	34287	0.900039
AFVG_25M106	25	47dc3a43-abef-4691-9075-a7e157e8e9cf	136_2	FALSE	43355	1571	0.371	19	68	583.81	39699	0.92	58	727.81	42213	0.973659
AFVG_25M107	25	5617d31c-b19d-487e-9c78-c4740e76e23d	140_1	FALSE	36605	161	0.353	15	67	482.06	32298	0.88	51	657.882	33552	0.916596
AFVG_25M108	25	25464eef-26be-4948-b66b-c0eaeb21fd1f	145_5	TRUE	30173	1860	0.317	40	59	473.75	27951	0.93	56	509.25	28518	0.94515
AFVG_25M109	25	488a1c85-5583-4ced-a45c-05dfcff89206	148_1	FALSE	36794	167	0.358	13	78	349.08	27228	0.74	54	633.611	34215	0.929907
AFVG_25M110	25	3e466a48-03b4-445b-aead-4647edca7ed7	14_2	FALSE	37890	178	0.36	57	51	668.12	34074	0.9	45	773.267	34797	0.918369
AFVG_25M111	25	8c186274-7057-4ba7-adae-58a6cb20f50c	151_1	FALSE	40067	701	0.347	91	72	496.25	35730	0.89	72	500.417	36030	0.899244
AFVG_25M112	25	0ac6d922-cf42-4f48-8579-a09650915434	151_14	FALSE	39828	704	0.347	22	77	434.42	33450	0.84	80	428.85	34308	0.861404
AFVG_25M113	25	6099d607-0e45-4e8d-956b-4302f5c797ba	152_1	FALSE	33107	217	0.344	30	55	561.11	30861	0.93	41	760.39	31176	0.941674
AFVG_25M114	25	7ef69320-a48e-4079-9d41-4ca40828a3c1	154_4	FALSE	56878	263	0.368	29	102	503.29	51336	0.9	86	626.023	53838	0.946552
AFVG_25M115	25	446a44a3-fb59-4fe0-ba25-6dc7941dee66	159_1	FALSE	34523	207	0.359	17	64	480.98	30783	0.89	54	618	33372	0.96666
AFVG_25M116	25	2ccc7c87-06ad-494d-8aa9-2dc18067a970	160_1	FALSE	34917	346	0.369	24	71	442.27	31401	0.9	57	587.895	33510	0.959704
AFVG_25M117	25	d89b0a27-1610-4aaf-a417-81619ecfbe0e	161_1	FALSE	34387	230	0.358	38	56	564.32	31602	0.92	52	617.827	32127	0.934277
AFVG_25M118	25	611b96c3-4015-4aef-bbf8-c3d115a1ac02	162_1	FALSE	34907	345	0.536	11	58	474.1	27498	0.79	50	646.8	32340	0.926462
AFVG_25M119	25	ebdf279f-5933-473b-b93a-5b904d0fa064	163_3	FALSE	35269	334	0.539	47	55	598.36	32910	0.93	50	672.6	33630	0.953529
AFVG_25M120	25	21f1a577-c9d6-481f-97af-662cb1047f77	166_1	FALSE	42002	1278	0.356	20	71	539.41	38298	0.91	56	698.464	39114	0.931241
AFVG_25M121	25	58246d9b-7a8b-4b87-80b5-ddd4c8748dc7	168_1	FALSE	53316	239	0.41	11	95	484.14	45993	0.86	66	749.182	49446	0.927414
AFVG_25M122	25	143ff001-8a36-4b06-97d6-c5f5c6459af4	172_1	FALSE	34707	226	0.368	21	60	523.25	31395	0.9	54	604.167	32625	0.940012
AFVG_25M123	25	f317d416-9cf0-471f-8e8b-1e3645242435	173_1	FALSE	33926	227	0.367	27	62	485.76	30117	0.89	57	544.105	31014	0.914166
AFVG_25M124	25	d6d4ad5d-d567-43a3-9be9-8cc82be892a6	173_2	FALSE	34327	229	0.366	31	62	494.37	30651	0.89	58	534.569	31005	0.903225
AFVG_25M125	25	1c422a9d-1f2b-465e-bb9c-24b6cdf40694	173_3	FALSE	34242	210	0.367	22	61	501.54	30594	0.89	55	567.273	31200	0.911162
AFVG_25M126	25	a7ffbb23-89f4-4cdf-91d8-c9f067c1ded6	184_1	FALSE	54057	365	0.504	12	89	508.18	45228	0.84	77	660.234	50838	0.940452
AFVG_25M127	25	8ac02f07-2f6a-49c1-957f-82149ef29d90	186_1	FALSE	34585	245	0.396	41	63	443.48	27939	0.81	50	631.38	31569	0.912795
AFVG_25M128	25	5c0f3264-be32-417f-ac6f-cf06f34c85d0	194_2	FALSE	39090	283	0.327	18	105	255.57	26835	0.69	92	370.598	34095	0.872218
AFVG_25M129	25	0aef0873-38f0-4c3b-8bf2-10dffcb09eac	195_3	FALSE	37505	208	0.334	21	71	486.34	34530	0.92	56	638.571	35760	0.953473
AFVG_25M130	25	a191facc-98e7-4bee-8382-60db19dac0ca	196_2	FALSE	33733	297	0.332	23	62	496.89	30807	0.91	53	621.453	32937	0.976403
AFVG_25M131	25	b9ff5a39-55bf-4d6c-be22-f25cf3a8db52	197_2	FALSE	43455	138	0.421	16	71	544.1	38631	0.89	63	655	41265	0.949603
AFVG_25M132	25	2a748411-7e82-4bab-b040-19dea23cd5b0	19_3	FALSE	31364	129	0.456	27	52	560.37	29139	0.93	52	576.058	29955	0.955076
AFVG_25M133	25	a954032f-3101-4e78-9d1a-c2b6aa88c44a	1_1	FALSE	43602	133	0.416	27	62	648.24	40191	0.92	56	726.964	40710	0.933673
AFVG_25M134	25	09412ab2-c96c-446f-a9fc-b7d22dc4599a	200_1	FALSE	34817	258	0.35	18	64	460.5	29472	0.85	55	606.327	33348	0.957808
AFVG_25M135	25	619cc80d-797a-44b4-88a0-6cad34299bf7	201_1	FALSE	33399	418	0.347	31	53	575.21	30486	0.91	50	641.52	32076	0.960388
AFVG_25M136	25	45f9bdd0-3543-4a00-b0aa-d6e167f79978	202_4	FALSE	59521	3790	0.369	45	118	439.25	51831	0.87	95	576.253	54744	0.919743
AFVG_25M137	25	7996c7f8-8d03-4842-b14b-fb099882fcab	203_2	FALSE	36585	194	0.321	58	58	569.38	33024	0.9	54	646.833	34929	0.954736
AFVG_25M138	25	f0eaf610-cf48-4b22-9235-1dc123a25563	206_10	FALSE	36812	148	0.356	57	48	720.81	34599	0.94	44	782.591	34434	0.935401
AFVG_25M139	25	cd9363a6-b7d9-4155-b318-d5008b2f24ab	206_11	FALSE	36779	166	0.355	13	58	530.48	30768	0.84	59	527.746	31137	0.846597
AFVG_25M140	25	407dca46-1547-42e9-a31f-2681aa819f6f	206_4	FALSE	36607	161	0.356	139	43	796.12	34233	0.93	43	797.023	34272	0.936214
AFVG_25M141	25	b0377edc-c4dc-4325-87ff-7ca53d456493	207_2	FALSE	43109	253	0.392	20	63	619.81	39048	0.91	50	799.68	39984	0.927509
AFVG_25M142	25	9fc1a177-aead-4f98-a8c6-b3efc6079480	208_1	FALSE	43684	212	0.417	24	62	658.4	40821	0.93	57	727.211	41451	0.948883
AFVG_25M143	25	ad9e9980-66b0-42c9-bc96-003e196d99bb	20_1	FALSE	31956	132	0.452	15	55	487.42	26808	0.84	52	545.885	28386	0.888284
AFVG_25M144	25	d84e8247-51a3-4078-8d93-c9a2cf11ac1e	211_1	FALSE	32204	215	0.352	103	53	565.92	29994	0.93	48	638.562	30651	0.951776
AFVG_25M145	25	a106da5a-6e7a-44e6-bff0-0c415cbe41aa	212_1	FALSE	32521	205	0.35	25	56	540.96	30294	0.93	50	623.46	31173	0.95855
AFVG_25M146	25	cb59b4de-5484-4c71-9dee-9ebfd0550754	215_10	FALSE	43778	214	0.419	24	71	562.9	39966	0.91	64	640.125	40968	0.935813
AFVG_25M147	25	fbbd7268-c13c-45c0-8ecf-e8cade9aaa70	215_7	FALSE	43764	218	0.42	13	79	473.96	37443	0.86	76	499.697	37977	0.867768
AFVG_25M148	25	8bb624c3-df20-428f-889a-752bf3072b2f	215_8	FALSE	43773	218	0.42	18	60	675.7	40542	0.93	56	724.929	40596	0.927421
AFVG_25M149	25	b7757f89-429c-42a6-8f80-a188dd5f6880	216_2	FALSE	37878	880	0.405	44	64	522.7	33453	0.88	62	568.887	35271	0.931174
AFVG_25M150	25	7533322e-ff70-4dab-b33a-8c01c1dc7204	217_1	FALSE	43799	136	0.418	25	56	714.43	40008	0.91	52	788.25	40989	0.935843
AFVG_25M151	25	b4cee31a-9783-4bb1-8fec-3845dba7373a	218_1	FALSE	59613	221	0.49	12	107	469.4	50226	0.84	102	508.676	51885	0.870364
AFVG_25M152	25	329facaa-e08d-4c23-a38f-11342a42d985	218_2	FALSE	59615	213	0.49	55	81	660.22	53478	0.9	78	701.038	54681	0.917236
AFVG_25M153	25	b52c5863-0723-451e-98d1-54c8409774d1	218_3	FALSE	59917	224	0.489	36	83	639.11	53046	0.88	74	744.446	55089	0.919422
AFVG_25M154	25	5b33bdec-8881-449d-b113-653443220c89	218_5	FALSE	59194	225	0.49	32	87	577.9	50277	0.85	81	668.185	54123	0.914333
AFVG_25M155	25	49f335d0-8eb5-4d50-bd73-53486bb4425d	21_7	FALSE	37209	166	0.355	85	45	766.8	34506	0.93	44	785.523	34563	0.928888
AFVG_25M156	25	86988f7c-4ef6-43f7-91c5-9fa209bd6b58	21_8	FALSE	37411	151	0.355	106	48	719.75	34548	0.92	47	736.66	34623	0.925476
AFVG_25M157	25	224561be-9c47-4fd6-b56b-25bb3bab29b6	21_9	FALSE	37435	164	0.354	81	52	660.63	34353	0.92	51	673.824	34365	0.917991
AFVG_25M158	25	e4c5ff60-c840-4091-b94e-604190565ad9	220_3	FALSE	31080	136	0.49	52	53	544.81	28875	0.93	51	582.118	29688	0.955212
AFVG_25M159	25	fc280887-3b39-432b-afe6-bf6f3de7f19b	220_4	FALSE	31675	136	0.49	46	54	547.11	29544	0.93	49	594.306	29121	0.919369
AFVG_25M160	25	9245e95f-d3e6-4458-a2fe-229409372b02	221_2	FALSE	36057	294	0.431	23	54	631.89	34122	0.95	51	680.059	34683	0.961894
AFVG_25M161	25	c26abed1-e4da-4e1c-9299-dd189dfeca2d	222_2	FALSE	36330	291	0.429	11	68	452.87	30795	0.85	60	559.7	33582	0.92436
AFVG_25M162	25	47742114-7726-46f3-b6d5-00e278ae4a43	223_1	FALSE	44688	215	0.418	13	62	625.5	38781	0.87	55	767.127	42192	0.944146
AFVG_25M163	25	30de136e-5c7e-4c77-b199-c375f591e129	225_4	FALSE	32329	195	0.363	97	56	550.39	30822	0.95	57	544.105	31014	0.959324
AFVG_25M164	25	dae06b23-ed63-446c-89d0-f26a1e269d13	226_4	FALSE	33041	194	0.362	55	57	534.58	30471	0.92	54	571.556	30864	0.934112
AFVG_25M165	25	28c39d27-2928-4eaa-b028-c145f19cf840	227_3	FALSE	59303	2577	0.365	12	128	393.05	50310	0.85	100	534.39	53439	0.901118
AFVG_25M166	25	e46ec858-3bee-4cae-a4bf-529b37e2edb1	228_1	FALSE	34350	195	0.333	12	67	441	29547	0.86	60	522.4	31344	0.912489
AFVG_25M167	25	81892fca-91cd-4165-b361-38cc9df8a6ce	229_4	FALSE	34087	196	0.332	70	61	515.85	31467	0.92	56	573.643	32124	0.942412
AFVG_25M168	25	ab10b414-39d9-47d9-b222-f71d0efe4e2a	234_5	FALSE	33584	212	0.345	24	74	382.22	28284	0.84	67	457.299	30639	0.912309
AFVG_25M169	25	ea614de6-8955-4acc-90e2-3ce8c921be79	236_1	FALSE	33453	369	0.353	33	69	439.83	30348	0.91	57	566.474	32289	0.965205
AFVG_25M170	25	4398726f-71a0-40da-99da-42ffb51275c7	237_2	FALSE	33114	329	0.372	21	60	492.6	29556	0.89	53	586.528	31086	0.938757
AFVG_25M171	25	fb17f8a9-013b-4dff-97f8-1f9e8c4a5809	239_1	FALSE	34098	223	0.366	12	66	433.32	28599	0.84	64	456.609	29223	0.85703
AFVG_25M172	25	1c98a558-3da9-4aa8-824c-e443a0b3cb1f	23_1	FALSE	36779	161	0.354	85	49	707.57	34671	0.94	47	740.043	34782	0.945703
AFVG_25M173	25	ec8ac6ae-2f0a-4cff-a6e8-d60c285bf47d	23_2	FALSE	36783	162	0.354	41	51	667.82	34059	0.93	49	698.51	34227	0.930511
AFVG_25M174	25	79cf08da-39de-40d6-bf29-8b2095c0699b	240_2	FALSE	34117	224	0.366	23	55	553.42	30438	0.89	51	612.235	31224	0.915204
AFVG_25M175	25	a2b2a84c-0411-49e3-8c1a-38f86c4bf5a4	243_2	FALSE	36182	173	0.413	60	48	690.06	33123	0.91	46	722.152	33219	0.918108
AFVG_25M176	25	a488d3fb-650f-4d06-bdc9-d4e047ba0d98	245_2	FALSE	33827	241	0.33	54	51	610.82	31152	0.92	46	702.717	32325	0.955598
AFVG_25M177	25	e225f7a2-0ad6-4824-a48e-c8a0861c5c76	246_1	FALSE	59879	205	0.438	43	80	682.65	54612	0.91	72	786.667	56640	0.945908
AFVG_25M178	25	f865dc62-4726-488c-88e5-88d9f83b5c8c	247_1	FALSE	36397	319	0.449	14	80	375.07	30006	0.82	64	508.594	32550	0.894304
AFVG_25M179	25	a1ec1089-43dd-44cc-a4a2-97c96236d70a	248_2	FALSE	60277	2220	0.342	17	144	334.19	48123	0.8	102	550.118	56112	0.930902
AFVG_25M180	25	f0eb3d70-1857-4566-960a-e9f026a9a4f2	24_1	FALSE	32836	424	0.361	58	58	526.09	30513	0.93	51	612.647	31245	0.951547
AFVG_25M181	25	cf5c2110-7c30-4041-b07b-fbabd7bd7e8e	251_1	FALSE	43263	251	0.394	59	49	791.2	38769	0.9	47	837.255	39351	0.909576
AFVG_25M182	25	66082fd2-c6c6-44ab-a4d3-267335272cde	251_2	FALSE	43233	224	0.393	39	53	715.64	37929	0.88	52	736.385	38292	0.885712
AFVG_25M183	25	4882dbb3-0c75-427a-b718-0bbdfb25bd98	252_4	FALSE	36166	350	0.58	80	53	632.21	33507	0.93	51	662.765	33801	0.934607
AFVG_25M184	25	06b5ed15-3403-4a38-a609-0a5f27482fd8	253_1	FALSE	32797	254	0.352	57	57	515.74	29397	0.9	51	597.824	30489	0.929628
AFVG_25M185	25	2fa48177-8634-40ac-9d8e-04cc9d1387ba	255_1	FALSE	59463	335	0.353	20	125	376.15	47019	0.79	98	552.367	54132	0.910348
AFVG_25M186	25	fd9e5774-b88d-4109-a6b3-207e444353dd	256_1	TRUE	31016	914	0.32	23	64	453	28992	0.93	54	543.667	29358	0.946544
AFVG_25M187	25	f324a27c-bdf8-4658-b8f7-46b62e37d300	25_1	FALSE	32354	461	0.363	36	58	493.91	28647	0.89	54	536.5	28971	0.895438
AFVG_25M188	25	8f02757c-5813-4ab4-8ebc-acde8150b662	25_4	FALSE	32989	463	0.361	25	60	480.85	28851	0.87	55	554.945	30522	0.925217
AFVG_25M189	25	e9374d13-bf15-4019-862a-0b565f9439b0	25_5	FALSE	33139	463	0.36	18	70	408.34	28584	0.86	67	434.418	29106	0.8783
AFVG_25M190	25	e8601ec5-2cde-4fa6-abd5-71b5e1897dab	260_1	FALSE	33676	238	0.346	22	65	446.26	29007	0.86	56	559.125	31311	0.929772
AFVG_25M191	25	f024f432-a750-4e13-a868-50c438b67904	262_1	FALSE	37065	240	0.341	20	76	435.04	33063	0.89	60	577.45	34647	0.934763
AFVG_25M192	25	678f8244-1abc-4efb-ac6d-b9c35c900749	263_1	FALSE	34321	219	0.539	18	53	559.42	29649	0.86	49	653.571	32025	0.933102
AFVG_25M193	25	77d27459-bedd-4faf-8ff6-56b3c3ca68e4	264_2	FALSE	36590	175	0.375	63	61	526.13	32094	0.88	52	651.173	33861	0.925417
AFVG_25M194	25	ef0394ce-6c9a-44ce-93c2-2ce5eff74d62	267_1	FALSE	61408	2836	0.35	11	117	415.41	48603	0.79	94	613.5	57669	0.939112
AFVG_25M195	25	2f785043-ea22-4d98-96ea-db09ea74ff74	268_1	FALSE	32918	252	0.423	18	59	514.42	30351	0.92	52	591.75	30771	0.934777
AFVG_25M196	25	51ab92c9-3817-4421-b92c-1c0d82d2a8e6	26_1	FALSE	36082	230	0.445	78	48	683.81	32823	0.91	48	718.25	34476	0.95549
AFVG_25M197	25	d55c5136-43b2-40d4-8e0a-0435d40d1c0d	270_1	FALSE	37693	166	0.347	10	82	359.3	29463	0.78	77	400.169	30813	0.817473
AFVG_25M198	25	a3987f9b-1045-47e2-a07d-1f9b43dff38d	271_2	FALSE	36854	171	0.345	17	63	520.57	32796	0.89	56	593.411	33231	0.901693
AFVG_25M199	25	5e2b1c72-da8d-411c-8db2-26d787174bdc	274_2	FALSE	33593	128	0.435	31	56	573.48	32115	0.96	56	577.982	32367	0.963504
AFVG_25M200	25	cbc92868-0798-49ee-a5a8-f05f166ebdad	275_3	FALSE	32241	281	0.348	72	46	658.57	30294	0.94	47	653.17	30699	0.952173
AFVG_25M201	25	eda1d972-6962-49f5-8d99-2d88af18fe92	278_1	FALSE	33346	253	0.369	56	53	597.11	31647	0.95	48	664.688	31905	0.956786
AFVG_25M202	25	f78c625b-3872-4fa3-913e-3c553a88a127	281_2	FALSE	36757	164	0.36	21	59	539.64	31839	0.87	47	726.702	34155	0.929211
AFVG_25M203	25	022ef855-a891-47c4-97a0-8b03113b14dd	285_1	FALSE	45674	138	0.412	15	70	571.5	40005	0.88	61	705.098	43011	0.941695
AFVG_25M204	25	f068705e-ae22-4e09-a645-264ba1669136	286_3	FALSE	35952	184	0.518	21	49	652.29	31962	0.89	48	687.875	33018	0.918391
AFVG_25M205	25	1630fdba-208a-46d9-9aaa-488c97707898	286_4	FALSE	35803	183	0.518	79	46	727.96	33486	0.94	43	789.07	33930	0.947686
AFVG_25M206	25	1f122728-3a7c-40d0-9317-9605c4bd7e94	287_1	FALSE	43492	135	0.42	24	59	679.47	40089	0.92	55	752.618	41394	0.951761
AFVG_25M207	25	9233513e-058d-44bf-9498-9b266b22152c	28_1	FALSE	32340	244	0.372	13	59	497.19	29334	0.91	52	587.192	30534	0.944156
AFVG_25M208	25	60bb3749-556d-4b52-8b9f-1a39d44fae2b	290_1	FALSE	37018	194	0.322	23	59	550.78	32496	0.88	49	706.286	34608	0.934897
AFVG_25M209	25	92bd8028-ca41-4bce-a46f-10adbc199dc4	292_1	FALSE	36136	357	0.349	54	86	373.33	32106	0.89	67	505.299	33855	0.936877
AFVG_25M210	25	7c85923b-c820-42c4-8ebc-59bb85dce86d	297_1	FALSE	32057	270	0.335	30	80	334.95	26796	0.84	56	548.036	30690	0.957357
AFVG_25M211	25	bf768e76-c69e-4adc-9079-2a5133b0d0da	302_1	FALSE	35586	191	0.344	32	72	410.21	29535	0.83	51	641.647	32724	0.919575
AFVG_25M212	25	987dc3a7-1a0a-4cce-b675-0442382991c3	303_4	FALSE	34014	493	0.41	59	56	577.61	32346	0.95	53	610.698	32367	0.951579
AFVG_25M213	25	59c58fa0-1902-4d43-891f-933ae8c50890	305_1	FALSE	53345	169	0.305	14	122	333.44	40680	0.76	107	440.495	47133	0.88355
AFVG_25M214	25	a9d5f4e3-ffd6-47c2-a839-8c1ec3dadda8	307_2	FALSE	35153	228	0.422	95	42	768.93	32295	0.92	42	777.5	32655	0.928939
AFVG_25M215	25	0b6b8d8a-f088-4c73-a19b-93e4025c2806	309_1	FALSE	38545	470	0.333	22	80	418.76	33501	0.87	72	492.708	35475	0.920353
AFVG_25M216	25	7d24ebf5-062e-4c4e-9ad3-306e6f435e0c	313_1	FALSE	32400	255	0.37	12	54	520.39	28101	0.87	47	634.723	29832	0.920741
AFVG_25M217	25	6c6d46d6-e0bf-46a8-a213-eaf5517a92d2	317_4	FALSE	44529	184	0.401	16	67	613.52	41106	0.92	65	648.462	42150	0.946574
AFVG_25M218	25	16bebfc2-f6bd-41dd-afc7-e4146b2601fd	317_5	FALSE	45097	194	0.402	14	70	560.4	39228	0.87	61	676.77	41283	0.915427
AFVG_25M219	25	54b30a44-f73b-492f-a172-a3530e054d5d	318_1	FALSE	36137	173	0.363	66	49	688.29	33726	0.93	45	750.333	33765	0.934361
AFVG_25M220	25	a211643e-3b06-4d11-bb4d-40db54a5644b	31_2	FALSE	34599	229	0.36	11	74	415.01	30711	0.89	75	410.48	30786	0.889795
AFVG_25M221	25	730a948b-faa1-49e8-a20c-1a1937a97da7	31_4	FALSE	34896	231	0.361	65	61	543	33123	0.95	61	548.705	33471	0.959164
AFVG_25M222	25	5d7525b9-dd08-46a6-ad26-8a88e34cc8df	31_5	FALSE	34417	233	0.362	25	69	467.74	32274	0.94	69	469.174	32373	0.940611
AFVG_25M223	25	2f0fd7c0-f7b9-45a3-8346-fd4b74ea3868	320_2	FALSE	36147	199	0.318	43	54	635.11	34296	0.95	49	712.469	34911	0.965806
AFVG_25M224	25	f0be4073-5388-4f38-ae4e-b1d98efa9b31	321_2	FALSE	37068	166	0.341	32	58	588.72	34146	0.92	49	712.898	34932	0.942376
AFVG_25M225	25	347da675-2504-4ebb-b72f-14c788b125c8	322_1	FALSE	33992	185	0.445	15	62	465.1	28836	0.85	52	596.712	31029	0.912832
AFVG_25M226	25	66aad757-5a7b-4e30-947c-7cd51f2e4e52	323_2	FALSE	34316	131	0.449	32	57	556.37	31713	0.92	54	604.778	32658	0.951684
AFVG_25M227	25	53f299db-377a-4a8a-a2b6-fd51633e16c3	323_4	FALSE	34046	129	0.449	39	58	551.02	31959	0.94	52	625.442	32523	0.955266
AFVG_25M228	25	5627b322-9dce-4c53-8e2e-7d24f724d71f	325_2	FALSE	39053	280	0.416	23	59	599.29	35358	0.9	55	667.091	36690	0.939492
AFVG_25M229	25	27eb94ba-1114-4deb-bebc-9916e554754f	326_1	FALSE	34094	373	0.352	12	92	303.68	27939	0.82	71	442.437	31413	0.921364
AFVG_25M230	25	bbc292c2-66e4-4d8e-b1fe-4a5aaf9db335	328_3	FALSE	32393	114	0.384	13	58	493.14	28602	0.88	48	641.438	30789	0.950483
AFVG_25M231	25	b0d99d66-62cf-4a1c-a124-0e0d9942b959	330_1	FALSE	37519	269	0.412	22	63	546.81	34449	0.92	52	676.385	35172	0.937445
AFVG_25M232	25	e8fa00ef-d8e1-4a34-acad-d6036599f38c	335_1	TRUE	33597	1879	0.311	52	77	407.61	31386	0.93	75	435.32	32649	0.971783
AFVG_25M233	25	a5a44af2-89b0-4792-8580-f1822aed2ad2	335_2	TRUE	33743	2019	0.312	18	84	357.46	30027	0.89	79	389.544	30774	0.912011
AFVG_25M234	25	2c485b8b-2a18-4664-8c6b-4a487800fe6e	337_1	FALSE	32269	130	0.449	58	57	517.63	29505	0.91	54	551.056	29757	0.922154
AFVG_25M235	25	12945832-2958-4105-942a-c9c2a6d8650b	33_1	FALSE	30832	131	0.452	109	49	604.29	29610	0.96	47	622.404	29253	0.948787
AFVG_25M236	25	a50edd39-d1b1-4857-92b9-1a2f5e491540	340_1	FALSE	37936	177	0.356	23	58	591.88	34329	0.9	45	782.267	35202	0.927931
AFVG_25M237	25	63d6ec28-ccfa-4711-bb54-795a551e97e5	342_1	FALSE	52087	211	0.342	33	84	566.32	47571	0.91	73	674.836	49263	0.945783
AFVG_25M238	25	218ca672-f98b-48cb-ad69-2f1bb23c455f	345_2	FALSE	43358	139	0.419	47	59	688.37	40614	0.94	57	728.684	41535	0.957955
AFVG_25M239	25	40f6d320-a1c5-41d6-aaf9-915736c84b33	346_1	FALSE	35781	281	0.458	32	56	579.91	32475	0.91	52	632.538	32892	0.919259
AFVG_25M240	25	1e97f2ab-00e1-464a-ab3b-2835f089cb11	348_1	FALSE	37555	167	0.341	22	61	549.98	33549	0.89	50	683.28	34164	0.909706
AFVG_25M241	25	e594d557-e499-4a58-8afd-cca624234f68	34_1	TRUE	28135	1321	0.331	22	43	539.16	23184	0.82	44	599.386	26373	0.937373
AFVG_25M242	25	a5d1a07a-7b09-4ec9-a011-cccaa3cd9613	352_2	FALSE	45808	216	0.404	30	61	695.46	42423	0.93	58	745.397	43233	0.943787
AFVG_25M243	25	e349b62a-3407-46c9-9211-6dfca7733095	353_3	FALSE	43392	135	0.42	39	55	726.87	39978	0.92	54	757.5	40905	0.942685
AFVG_25M244	25	4ab5743b-d1e6-4c66-a375-b195e0df6d3f	354_6	TRUE	35086	1683	0.36	40	74	373.34	27627	0.79	70	443.186	31023	0.884199
AFVG_25M245	25	c185cf5f-70c4-44dc-a7ea-0dad77979280	354_7	TRUE	34855	1822	0.361	49	81	358.59	29046	0.83	71	437.873	31089	0.891952
AFVG_25M246	25	2492b731-db68-4ea3-8162-a0fc89230c09	354_8	TRUE	34233	1211	0.361	26	74	361.42	26745	0.78	67	443.552	29718	0.86811
AFVG_25M247	25	8dfe7911-8d6a-4ce8-bf7a-31ceffaa92cf	354_9	TRUE	34571	1549	0.361	22	69	377.83	26070	0.75	65	445.662	28968	0.837928
AFVG_25M248	25	9e5564fa-9438-49b3-ae59-8957458eae9e	355_1	FALSE	44407	217	0.419	49	63	655.29	41283	0.93	57	736.053	41955	0.944783
AFVG_25M249	25	470c4efa-e938-475e-9257-adddd49341cd	356_2	FALSE	44323	214	0.42	107	57	727.89	41490	0.94	55	761.345	41874	0.944747
AFVG_25M250	25	6cd11f35-6034-41a6-a2a0-d6a3da4f565b	359_1	FALSE	32231	119	0.449	16	65	463.29	30114	0.93	54	573.889	30990	0.961497
AFVG_25M251	25	cf1ef9d0-4f4f-4541-a125-f6004d3e2fd0	364_1	FALSE	38050	379	0.372	27	66	511.32	33747	0.89	58	596.069	34572	0.908594
AFVG_25M252	25	8e7f709e-adc5-4b75-9079-268cfd696896	366_1	FALSE	33009	236	0.474	51	49	626.02	30675	0.93	48	647.188	31065	0.941107
AFVG_25M253	25	5ad051ab-8b37-4696-b99a-e8abf7353ca4	367_2	FALSE	33048	236	0.473	149	47	639.77	30069	0.91	48	629.312	30207	0.914034
AFVG_25M254	25	53c4b7fa-831b-4a3d-a439-13c97fe3efd1	368_1	FALSE	31912	493	0.404	87	49	607.16	29751	0.93	48	629.25	30204	0.946478
AFVG_25M255	25	a55c218e-509e-4662-976b-92a4c4e9e8a4	36_1	FALSE	34879	228	0.361	42	61	535.08	32640	0.94	59	576.508	34014	0.9752
AFVG_25M256	25	f75604f0-2a0f-4c2e-8801-3be80c1439a0	371_1	FALSE	36860	173	0.412	81	50	665.64	33282	0.9	49	683.143	33474	0.908139
AFVG_25M257	25	d99e774e-af2a-4a3c-822d-5d3b40fc1109	371_3	FALSE	36582	172	0.412	14	57	542.42	30918	0.84	56	552.911	30963	0.8464
AFVG_25M258	25	a9b1aa70-48c7-4b94-83f7-fbe6811a5b2f	373_2	FALSE	43981	205	0.424	42	55	731.78	40248	0.91	51	801.706	40887	0.929651
AFVG_25M259	25	f1ff2f12-123c-4bdf-83d7-24641c8f81a2	376_1	FALSE	51077	253	0.346	33	83	571.81	47460	0.93	74	657.243	48636	0.952209
AFVG_25M260	25	779c4d22-f40d-44ab-a5e9-d676bce45d05	378_1	FALSE	34304	136	0.296	19	80	200.51	16041	0.47	54	587.944	31749	0.925519
AFVG_25M261	25	b7bb3c46-5bf8-48b6-b8cf-2ded078a9d69	37_8	FALSE	32740	316	0.334	118	57	546.47	31149	0.95	52	609.692	31704	0.968357
AFVG_25M262	25	5d07b5a4-88fb-4424-9ca2-39c7404fdab7	384_1	FALSE	36453	279	0.454	43	50	656.22	32811	0.9	50	669.78	33489	0.91869
AFVG_25M263	25	18e5cb7e-0d8c-46c0-a7c2-754988bd32d4	385_2	FALSE	35993	276	0.456	34	48	689.44	33093	0.92	47	710.489	33393	0.927764
AFVG_25M264	25	f823aeca-21e0-4fa9-b67a-6f16f828576c	385_3	FALSE	35983	279	0.456	43	50	652.44	32622	0.91	51	639.882	32634	0.906928
AFVG_25M265	25	51a7983d-851a-476c-9f45-de51c765fa8b	386_1	FALSE	32347	504	0.406	19	59	491.85	29019	0.9	57	527.474	30066	0.929483
AFVG_25M266	25	4aacb710-0d81-4c3f-8755-bec183baa9e8	388_4	FALSE	40348	381	0.366	79	65	543.32	35316	0.87	63	571.048	35976	0.891643
AFVG_25M267	25	60e2eb97-5857-4a5b-b3d7-40a63bc42ebd	388_5	FALSE	40351	382	0.367	44	64	557.16	35658	0.88	62	592.403	36729	0.910238
AFVG_25M268	25	0c6139fb-7d40-4b5c-a208-2ae5326a2e12	389_1	FALSE	32465	263	0.348	19	61	470.26	28686	0.88	52	577.096	30009	0.924349
AFVG_25M269	25	f96e5ba0-3716-4476-bf40-5b3d6d7be01c	390_1	FALSE	33358	214	0.346	32	55	545.56	30006	0.9	52	606.058	31515	0.944751
AFVG_25M270	25	98795fbe-4e10-4d43-be79-d2934c443bf2	393_2	FALSE	43547	144	0.419	39	58	681.21	39510	0.91	53	770.887	40857	0.938228
AFVG_25M271	25	4e399967-2d8e-4408-a0c9-890db9910b74	394_1	FALSE	36056	359	0.368	14	66	496.36	32760	0.91	58	591	34278	0.950688
AFVG_25M272	25	6522e418-4451-47a8-bca4-9012bb35b101	396_1	FALSE	35876	239	0.363	40	59	545.49	32184	0.9	51	635.294	32400	0.903111
AFVG_25M273	25	23f6381e-fdf6-449f-bd38-d2301ef9726f	397_1	FALSE	40487	368	0.37	48	64	562.5	36000	0.89	63	594.524	37455	0.925112
AFVG_25M274	25	737742b9-e2f2-41d5-8a63-a3d3d1c47011	398_1	FALSE	37996	166	0.338	37	46	762.65	35082	0.92	42	856.357	35967	0.9466
AFVG_25M275	25	558f3d14-0e67-4c4f-a083-569364fc5cb7	39_3	TRUE	33765	1112	0.343	13	74	401.31	29697	0.88	73	416.137	30378	0.899689
AFVG_25M276	25	8cf0f513-bdda-410d-b4cd-822eeb9aea56	39_4	TRUE	33763	1091	0.343	51	59	534.05	31509	0.93	58	565.862	32820	0.97207
AFVG_25M277	25	9de6fdcf-3a96-4fcb-a765-a160bfd2b113	400_6	TRUE	31609	1222	0.375	23	60	489	29340	0.93	59	499.983	29499	0.933247
AFVG_25M278	25	c4eceb65-1194-4017-b7d1-e6bfe784d847	400_7	TRUE	31696	1315	0.375	19	66	438.64	28950	0.91	65	455.215	29589	0.933525
AFVG_25M279	25	14844313-a8a0-4deb-a077-775b8635ac7f	400_8	TRUE	31379	1001	0.376	32	50	582.66	29133	0.93	49	601.469	29472	0.939227
AFVG_25M280	25	39b66431-5614-4b2f-988f-a6ff0cae4eb4	400_9	TRUE	31708	1320	0.375	29	51	586.24	29898	0.94	49	610.776	29928	0.943863
AFVG_25M281	25	4f90a0cd-026f-41fc-a930-698d15ae255d	407_11	FALSE	36711	162	0.351	117	46	739.89	34035	0.93	46	743.935	34221	0.932173
AFVG_25M282	25	9f8b851e-f257-447f-935c-31ebd8da175c	407_12	FALSE	36707	148	0.351	41	50	665.52	33276	0.91	50	669.54	33477	0.912006
AFVG_25M283	25	fe0122f4-dd32-4b84-a19b-4024c450b1fe	407_3	FALSE	36862	165	0.352	35	51	660	33660	0.91	49	695.939	34101	0.925099
AFVG_25M284	25	1b5b21a1-2e1c-45fb-9315-48231e77a46b	407_9	FALSE	36564	162	0.352	72	51	659.71	33645	0.92	46	728.087	33492	0.915983
AFVG_25M285	25	d6aab056-b234-492d-a6d3-e9c7ff26494c	409_1	FALSE	34060	378	0.354	51	69	473.57	32676	0.96	65	505.985	32889	0.965619
AFVG_25M286	25	fe9fd24d-56aa-47d1-be5d-d373ae2b7232	409_3	FALSE	34260	369	0.354	36	68	476.51	32403	0.95	66	496.136	32745	0.955779
AFVG_25M287	25	fd6a1c1a-1cab-47d0-9738-30a7fd17cc5c	410_3	FALSE	43348	136	0.422	119	61	659.46	40227	0.93	57	723.789	41256	0.951739
AFVG_25M288	25	9a0115e5-5f97-41c5-9fe0-c227fcc00615	411_1	FALSE	32601	332	0.534	19	54	569.83	30771	0.94	51	608.765	31047	0.952333
AFVG_25M289	25	5735eeab-dbfa-4a4e-8be5-690d5cfa9ca9	413_1	FALSE	54163	188	0.323	18	101	471.74	47646	0.88	88	590.932	52002	0.960102
AFVG_25M290	25	bfef7b8a-28f5-4f0f-80e3-5dfc37739a80	416_2	FALSE	31770	506	0.405	42	56	530.09	29685	0.93	51	579.765	29568	0.930689
AFVG_25M291	25	9339a164-9d4b-4534-ae91-b9bb87fe85ce	417_4	FALSE	31093	507	0.406	23	55	523.85	28812	0.93	55	526.909	28980	0.932043
AFVG_25M292	25	479201fd-f7d4-498c-ac2f-5bf96bfbc3bf	417_6	FALSE	31822	500	0.407	103	50	595.92	29796	0.94	49	610.531	29916	0.940104
AFVG_25M293	25	d9f27b45-4281-4c39-b10a-7de37d6351cc	41_1	FALSE	43723	135	0.419	13	70	547.63	38334	0.88	56	729.321	40842	0.934108
AFVG_25M294	25	685f0d3b-275a-4425-9b6a-e2b5538ddc00	422_3	FALSE	40866	358	0.373	27	68	519.26	35310	0.86	58	641.276	37194	0.910145
AFVG_25M295	25	e3610845-a7a9-4c36-a4b3-374201ecf38c	426_1	FALSE	31888	216	0.361	23	51	580.06	29583	0.93	51	586.059	29889	0.937312
AFVG_25M296	25	02058d08-0a61-45ac-9ffc-30cf063b35c4	426_2	FALSE	33512	216	0.361	47	53	591.57	31353	0.94	51	612	31212	0.931368
AFVG_25M297	25	71568f44-99fc-4ed7-8d48-0275ff23cc50	427_1	FALSE	34768	184	0.332	18	70	424.63	29724	0.85	63	525.286	33093	0.951824
AFVG_25M298	25	e474d5cc-17a3-42f6-b716-e7fa57adb900	430_1	FALSE	30350	1368	0.381	13	51	490.94	25038	0.83	50	535.2	26760	0.881713
AFVG_25M299	25	42509cff-e27f-4c80-8e20-1143b68e8965	436_1	FALSE	38483	266	0.504	10	65	508.15	33030	0.86	51	677.471	34551	0.897825
AFVG_25M300	25	196c336e-306b-4454-a2a8-fc14da587441	438_1	FALSE	37984	292	0.385	14	56	590.3	33057	0.87	51	681	34731	0.914359
AFVG_25M301	25	27429043-5ade-4919-8a65-0f1cd16c418f	43_7	FALSE	36557	188	0.334	88	69	505.26	34863	0.95	66	525.955	34713	0.949558
AFVG_25M302	25	1b22f030-303d-493c-8da2-eb0a0d0c44c3	43_8	FALSE	36554	188	0.333	81	69	499.74	34482	0.94	69	510.174	35202	0.963014
AFVG_25M303	25	f5ab1749-4a0f-43f4-b01a-0e80fb0f7f7e	440_1	FALSE	32411	209	0.325	22	64	433.73	27759	0.86	55	553.309	30432	0.93894
AFVG_25M304	25	c911d971-3860-4959-b548-9cde4545f0d6	445_1	FALSE	37174	177	0.359	88	44	797.32	35082	0.94	44	797.659	35097	0.944128
AFVG_25M305	25	b8df9750-8d0c-415e-81f4-b231b80c31fa	445_2	FALSE	37559	173	0.359	29	54	628.33	33930	0.9	54	634.389	34257	0.912085
AFVG_25M306	25	a005b111-8072-4bdd-ba2e-a4a3f8c85af2	446_2	FALSE	37759	173	0.33	45	50	711.42	35571	0.94	43	834.349	35877	0.950158
AFVG_25M307	25	179e2084-e58a-44d4-8ede-35ff4946eaaf	449_1	FALSE	32967	227	0.453	36	51	571.18	29130	0.88	44	672.75	29601	0.897898
AFVG_25M308	25	f2a77387-0784-455c-b6d0-aa294e47ccfa	44_1	FALSE	41108	193	0.324	14	79	443.24	35016	0.85	74	481.865	35658	0.867422
AFVG_25M309	25	a3f309ac-83bd-4edd-b7bb-d31313500527	456_1	FALSE	43996	252	0.39	57	57	723.79	41256	0.94	55	765.545	42105	0.957019
AFVG_25M310	25	bb371f73-1bd4-4387-a495-373683f34685	457_1	FALSE	33197	432	0.357	19	75	354.96	26622	0.8	59	485.695	28656	0.863211
AFVG_25M311	25	ed199f6d-aa27-4441-a3c2-8b1cbcb605ce	459_1	FALSE	35449	241	0.334	22	62	537.48	33324	0.94	50	680.58	34029	0.959942
AFVG_25M312	25	5b04dbab-9cd3-4b9b-9980-ad83cc12c540	45_1	FALSE	34318	209	0.482	10	63	467.52	29454	0.86	55	595.145	32733	0.953814
AFVG_25M313	25	aa9cae3c-dbc7-4673-9497-386b3941d804	45_3	FALSE	35172	215	0.479	11	65	456.69	29685	0.84	47	695.617	32694	0.929546
AFVG_25M314	25	04ea0d62-5957-474a-849a-d150a15bc494	460_1	FALSE	34772	325	0.325	19	71	450.04	31953	0.92	63	529.762	33375	0.959824
AFVG_25M315	25	1c7e664e-7dea-4add-9278-c6d50315d697	462_1	FALSE	34840	215	0.444	24	54	585.33	31608	0.91	42	768.929	32295	0.926952
AFVG_25M316	25	98489559-f0a5-4cea-a5fe-0f0db3d08f55	466_2	FALSE	38895	165	0.342	10	73	432.9	31602	0.81	57	571.526	32577	0.837563
AFVG_25M317	25	b9c7135c-e16c-4de4-b93c-f672c89022d8	467_1	FALSE	38338	167	0.339	54	48	731.25	35100	0.92	44	823.773	36246	0.945433
AFVG_25M318	25	b1419776-efde-46c7-bd22-3713b46147f6	468_1	FALSE	50672	342	0.334	28	82	539.38	44229	0.87	70	675.129	47259	0.932645
AFVG_25M319	25	119cd568-f395-415d-b244-14ee17946513	472_1	FALSE	36998	164	0.359	16	59	562.98	33216	0.9	47	738.064	34689	0.937591
AFVG_25M320	25	132cd233-8ce7-4db6-a68a-af0d33b07999	473_3	FALSE	34433	279	0.423	20	59	525.71	31017	0.9	55	565.527	31104	0.903319
AFVG_25M321	25	1c15b725-85fe-49d2-9c1d-dbb94bebe1ec	474_2	FALSE	34437	228	0.413	19	59	538.63	31779	0.92	57	566.684	32301	0.937974
AFVG_25M322	25	2f70124f-1273-4e3e-b3e3-767209a0b28c	476_1	FALSE	37840	248	0.453	13	50	669.48	33474	0.88	49	678.061	33225	0.878039
AFVG_25M323	25	0ff896dc-4b38-4b53-9f72-f5fc985e1efe	478_1	FALSE	33364	222	0.46	24	50	612.24	30612	0.92	49	632.755	31005	0.929295
AFVG_25M324	25	bc5c076e-b80c-4304-95a2-0716409a9cc5	479_1	FALSE	56856	2667	0.337	29	140	338.31	47364	0.83	93	559.129	51999	0.914574
AFVG_25M325	25	880a6d9b-9ca8-4c34-aa88-d6cc03531540	481_3	FALSE	35967	165	0.336	19	85	362.33	30798	0.86	65	502.8	32682	0.908666
AFVG_25M326	25	8e419d19-efe8-45d3-85b8-f993cf7f96fb	482_1	FALSE	31984	214	0.349	17	59	492.61	29064	0.91	48	635.188	30489	0.953258
AFVG_25M327	25	2a397b3c-d90d-454b-a678-13e0120adbde	488_2	FALSE	59421	3677	0.37	23	107	501.76	53688	0.9	94	588.447	55314	0.930883
AFVG_25M328	25	15f4a580-e2bb-4659-a753-163c857e6710	489_2	FALSE	43011	210	0.421	12	69	521.91	36012	0.84	56	698.196	39099	0.909047
AFVG_25M329	25	ab1e6b56-d017-4211-a6be-ca4d35bf3f2b	490_1	FALSE	43455	136	0.42	12	68	522.75	35547	0.82	61	628.23	38322	0.881878
AFVG_25M330	25	d12b6486-972f-4131-9a9f-01f7094ab485	491_1	FALSE	32231	501	0.405	18	61	470.9	28725	0.89	61	495.443	30222	0.937669
AFVG_25M331	25	4760a7c2-3861-4059-8550-c1c44aa696fd	492_1	FALSE	31929	509	0.405	35	55	538.8	29634	0.93	49	614.449	30108	0.942967
AFVG_25M332	25	e2e0195b-6824-4c40-8afc-49f4f0622a84	496_1	FALSE	30873	142	0.418	28	56	508.71	28488	0.92	51	579.471	29553	0.957244
AFVG_25M333	25	9383d040-242f-4972-a2a2-93884b0aac42	498_1	FALSE	35547	237	0.362	42	52	618.23	32148	0.9	44	752.523	33111	0.931471
AFVG_25M334	25	9ce40498-8240-46ab-b145-b0f7173bd6e9	499_1	FALSE	36192	209	0.348	12	79	381.95	30174	0.83	65	498.738	32418	0.895723
AFVG_25M335	25	8fcd505f-3885-402d-90e1-dd2b5d682eae	4_1	FALSE	34580	287	0.426	45	57	558.21	31818	0.92	56	563.732	31569	0.912927
AFVG_25M336	25	93acff77-9fa3-4eb6-b28a-1fba7aae01ed	4_2	FALSE	34567	286	0.425	43	60	514.75	30885	0.89	60	518.25	31095	0.899557
AFVG_25M337	25	1f2d6969-9bf9-4728-9b55-26b287e1ce32	4_4	FALSE	34207	285	0.424	50	56	543.91	30459	0.89	55	561.055	30858	0.902096
AFVG_25M338	25	2b8bc764-2cc5-4cd5-8851-b4832e644267	4_5	FALSE	34724	284	0.425	16	61	493.13	30081	0.87	59	532.831	31437	0.905339
AFVG_25M339	25	6b825507-cacd-4d39-b75e-fe9a21cbd502	500_2	FALSE	37168	209	0.348	23	70	450.9	31563	0.85	47	726.766	34158	0.919016
AFVG_25M340	25	b2a5c39c-165c-492b-988a-0ac0bca8bd0e	501_1	FALSE	34466	211	0.34	15	68	429.97	29238	0.85	55	586.364	32250	0.935705
AFVG_25M341	25	d678cb83-999e-4996-86cf-36f24f43c21b	504_1	FALSE	33886	187	0.505	23	45	672.67	30270	0.89	45	684.667	30810	0.909225
AFVG_25M342	25	7f5933a6-4716-4ec4-b31c-7275820e9ea1	504_2	FALSE	34423	187	0.505	14	54	528.89	28560	0.83	58	520.759	30204	0.877437
AFVG_25M343	25	aaaa482e-fb29-4c82-a33b-286e8d860ca6	505_1	FALSE	34313	324	0.329	54	66	493.55	32574	0.95	61	539.705	32922	0.959461
AFVG_25M344	25	bf64f010-7118-4029-959c-38a003c5d692	510_3	FALSE	31792	140	0.484	21	58	514.09	29817	0.94	52	591.865	30777	0.968074
AFVG_25M345	25	eeeb77ce-1623-4c16-83b3-9464f785d0d2	512_1	FALSE	31027	356	0.362	29	57	498	28386	0.91	44	678.205	29841	0.961775
AFVG_25M346	25	32d2e699-1593-4aa1-a10a-623072aa55c0	516_1	FALSE	60925	198	0.458	23	84	686.75	57687	0.95	75	775.64	58173	0.95483
AFVG_25M347	25	3c21182b-d958-4305-86ef-4959dac13b21	517_1	FALSE	54096	171	0.308	11	124	341.61	42360	0.78	97	519.031	50346	0.930679
AFVG_25M348	25	c331a270-dad4-4ce2-a064-b75fb16122da	522_2	FALSE	56480	152	0.33	64	103	511.02	52635	0.93	93	582.355	54159	0.958906
AFVG_25M349	25	89d42314-a6c7-45c5-9f5d-388d40d13f54	526_1	FALSE	32230	297	0.474	15	59	439.27	25917	0.8	54	529	28566	0.886317
AFVG_25M350	25	76a87630-3e88-42a9-a651-1a345f5ee622	52_2	FALSE	34302	304	0.418	26	49	603.98	29595	0.86	50	614.7	30735	0.896012
AFVG_25M351	25	b8c8fcd6-40cf-43f4-90a4-1e8d9b815bd7	537_1	FALSE	35889	242	0.335	12	77	260.84	20085	0.56	76	373.5	28386	0.790939
AFVG_25M352	25	bc4b1c86-5ff0-487f-9239-56fab2032d0e	541_1	FALSE	34389	195	0.358	13	64	446.16	28554	0.83	60	513.25	30795	0.89549
AFVG_25M353	25	645e5306-b6eb-49d2-b6b1-af3257141e02	542_3	FALSE	34325	113	0.318	17	60	501.75	30105	0.88	57	553.211	31533	0.91866
AFVG_25M354	25	ddd54cf9-3e10-4af4-a0fc-3ec8183f624a	544_1	FALSE	34222	290	0.326	34	70	451.33	31593	0.92	63	525.952	33135	0.968237
AFVG_25M355	25	bd996ded-9199-4116-93f9-896a9ab10b1d	547_2	FALSE	32776	424	0.408	29	53	574.19	30432	0.93	49	640.102	31365	0.95695
AFVG_25M356	25	b1138719-90a1-48c6-b76c-740d77d49488	548_1	FALSE	34556	197	0.387	15	73	410.47	29964	0.87	45	741.467	33366	0.965563
AFVG_25M357	25	44666083-5f14-4c43-b3f0-f8273d3dc8b9	552_1	FALSE	37367	230	0.34	16	71	459.21	32604	0.87	67	505.925	33897	0.907137
AFVG_25M358	25	d5459e6a-68bc-4d38-acc7-1fead8f6f5dc	553_1	FALSE	43282	210	0.418	20	68	569.74	38742	0.89	56	737.143	41280	0.953745
AFVG_25M359	25	2041cd8a-a319-4026-8d13-102984ecdef6	556_2	FALSE	32876	233	0.338	31	59	491.8	29016	0.88	53	574.585	30453	0.926299
AFVG_25M360	25	fc17b746-f765-480b-b39a-5c6cb9674bc9	557_2	FALSE	32658	138	0.454	28	45	654.6	29457	0.9	43	701.86	30180	0.924123
AFVG_25M361	25	34369ebe-d821-4d1f-92e3-09ff1a0b33d2	559_1	FALSE	31663	247	0.34	17	54	529.78	28608	0.9	51	589.882	30084	0.950131
AFVG_25M362	25	0ae070c6-70fe-445d-93a9-d54b9a5b2587	562_1	FALSE	53386	153	0.303	17	109	425.7	46401	0.87	94	533.457	50145	0.939291
AFVG_25M363	25	bea8cdda-d935-4a4a-b148-94031c30ab44	563_1	FALSE	35822	204	0.33	41	64	509.2	32589	0.91	66	514.182	33936	0.947351
AFVG_25M364	25	2fc4d5da-e78f-403d-99fe-9858f88eb726	564_2	FALSE	32611	105	0.445	17	64	466.83	29877	0.92	53	574.585	30453	0.933826
AFVG_25M365	25	7cd3ea04-607c-4aab-b24f-c34044cee75d	566_1	FALSE	60579	2852	0.373	14	112	452.84	50718	0.84	91	616.615	56112	0.926262
AFVG_25M366	25	483707e5-1dd5-459b-bcff-8f10bd24110b	56_1	FALSE	34280	277	0.332	31	67	491.19	32910	0.96	60	554.2	33252	0.970012
AFVG_25M367	25	b87f0466-f0e4-4f46-936d-544d5fca3a94	573_2	FALSE	59367	1173	0.36	12	134	358.32	48015	0.81	109	493.982	53844	0.906969
AFVG_25M368	25	cdf5af02-d677-4bd5-8581-fe1830c97810	576_2	FALSE	54630	241	0.357	25	88	563.15	49557	0.91	78	652.385	50886	0.931466
AFVG_25M369	25	d3f8cab4-f19b-43db-9152-84497bdc20f8	578_2	FALSE	37727	227	0.335	57	57	595.26	33930	0.9	50	709.68	35484	0.940547
AFVG_25M370	25	adfcf9f4-c70c-4d1b-b867-3125e396eae6	582_1	FALSE	37880	180	0.363	21	53	630.62	33423	0.88	48	734.812	35271	0.931125
AFVG_25M371	25	aaee2f13-084e-4b8f-89cb-96fe0da3e381	585_2	FALSE	34402	185	0.458	30	54	560.67	30276	0.88	49	642.796	31497	0.915557
AFVG_25M372	25	b7bf9aa5-6a5f-4022-aa17-68756b5bee7e	586_1	FALSE	36390	208	0.362	22	74	439.7	32538	0.89	65	526.477	34221	0.940396
AFVG_25M373	25	41b0a172-e99e-4f16-a337-8e2a281d93eb	587_1	FALSE	36547	259	0.352	22	70	460.2	32214	0.88	70	492.6	34482	0.943497
AFVG_25M374	25	6b839f42-5a81-4425-b78a-f1f8d6509f12	588_1	FALSE	33989	231	0.336	28	78	361.65	28209	0.83	60	536.75	32205	0.947512
AFVG_25M375	25	f3504083-5a38-410a-8fd5-a08b8d2ef8e1	589_2	FALSE	34104	213	0.341	10	75	351.6	26370	0.77	57	548.579	31269	0.916872
AFVG_25M376	25	27a7ca3b-3bde-4474-9b28-22fb675c58c0	595_1	FALSE	34425	95	0.318	45	58	537.05	31149	0.9	53	615.792	32637	0.948061
AFVG_25M377	25	6fddfeb2-637e-4f4d-aa0e-1ca794ddf9c5	599_1	FALSE	37584	206	0.346	16	74	461.64	34161	0.91	60	578.9	34734	0.92417
AFVG_25M378	25	23a8ea8d-5ef2-4361-9d94-ccadd41fec8d	601_1	FALSE	37319	503	0.385	32	59	568.53	33543	0.9	49	694.163	34014	0.911439
AFVG_25M379	25	fc7a6c8a-f575-4594-b2f4-917d5e66ea7d	609_3	FALSE	35202	282	0.45	17	62	471.63	29241	0.83	53	598.245	31707	0.900716
AFVG_25M380	25	cd2e525c-3394-4a21-b3c2-511347420863	612_1	FALSE	34779	175	0.36	22	48	664.12	31878	0.92	44	738.955	32514	0.934874
AFVG_25M381	25	fc1a07f0-32e1-4c97-9915-92d6e861268b	614_1	FALSE	33930	323	0.326	84	63	520.52	32793	0.97	60	542.5	32550	0.959328
AFVG_25M382	25	a3139bc7-c513-42bf-8d41-b9a2fea7aabe	614_2	FALSE	33903	315	0.325	42	68	454.9	30933	0.91	63	500.81	31551	0.930626
AFVG_25M383	25	3c4373d0-d38b-4ea6-b231-c24d867d1873	616_1	FALSE	35361	502	0.337	36	67	469.84	31479	0.89	64	510.891	32697	0.924663
AFVG_25M384	25	b7418ec1-90b1-41f9-a9ed-d6b700bc9738	618_1	FALSE	32506	334	0.36	79	48	631.94	30333	0.93	47	666.894	31344	0.964253
AFVG_25M385	25	f1357055-0d8c-4caf-904f-7c2a51d86225	61_2	FALSE	33947	283	0.335	14	74	400.09	29607	0.87	65	488.354	31743	0.935075
AFVG_25M386	25	ee433989-5b27-45b3-9e75-8077f038cc7c	61_3	FALSE	33440	284	0.334	73	59	531.1	31335	0.94	58	554.586	32166	0.961902
AFVG_25M387	25	d5e9f800-e192-4702-9dc9-cf787790aaf4	621_1	TRUE	33169	878	0.346	23	66	443.41	29265	0.88	60	512.85	30771	0.927704
AFVG_25M388	25	b707442b-6ac1-42ed-98a0-4ef1542e13ec	621_2	TRUE	33944	1636	0.346	25	69	434.22	29961	0.88	65	487.985	31719	0.934451
AFVG_25M389	25	19b4c1ed-6d83-4a8a-b823-5d2343ce0a9c	626_2	FALSE	37409	163	0.331	21	67	498.76	33417	0.89	46	763.239	35109	0.938517
AFVG_25M390	25	1e53ec83-219d-428f-a739-8bbfa82a2983	628_2	FALSE	38079	159	0.399	51	59	596.64	35202	0.92	57	625.526	35655	0.936343
AFVG_25M391	25	878a497e-ef51-43f6-b204-9888d8322774	630_1	FALSE	32223	307	0.387	14	59	458.69	27063	0.84	52	575.308	29916	0.928405
AFVG_25M392	25	e0898427-e691-4cd4-8bc7-d4048dd37fde	632_2	FALSE	44129	139	0.42	23	64	587.67	37611	0.85	59	696.61	41100	0.93136
AFVG_25M393	25	35b93169-f067-4919-9698-bf6616652426	638_2	FALSE	41440	338	0.377	10	76	454.3	34527	0.83	67	572.149	38334	0.925048
AFVG_25M394	25	ade6defc-5c0c-4773-a7e1-f5a4efce5e35	639_5	FALSE	38139	276	0.335	43	79	436.82	34509	0.9	72	486.208	35007	0.917879
AFVG_25M395	25	9930dce5-99e4-491e-9549-513ba1a0595c	647_1	FALSE	36669	262	0.453	22	54	597.72	32277	0.88	52	644.365	33507	0.913769
AFVG_25M396	25	29573d12-ccb3-4e05-8d8a-6a4849bfd2fa	648_2	FALSE	37499	165	0.353	35	62	537.87	33348	0.89	52	676.615	35184	0.938265
AFVG_25M397	25	861aa9bd-aaec-4ef6-9a6d-3945f2d79f2a	651_2	FALSE	36396	211	0.33	22	65	459.97	29898	0.82	59	560.898	33093	0.909248
AFVG_25M398	25	edd4ea90-b13a-4422-b150-a65049adc475	654_1	FALSE	53253	204	0.322	18	96	488.28	46875	0.88	80	628.35	50268	0.943947
AFVG_25M399	25	e579e85e-3297-46fd-b6d3-d66afa4d7fcb	659_1	FALSE	42990	257	0.395	29	53	721.42	38235	0.89	50	801.96	40098	0.932729
AFVG_25M400	25	af0e9478-1e7e-4a00-9f73-a89ce2008a89	662_1	FALSE	34440	339	0.568	17	55	552	30360	0.88	58	546.31	31686	0.920035
AFVG_25M401	25	f28baf52-94c8-47d2-9a6a-c6d178df0c84	663_2	FALSE	34345	352	0.569	63	52	618.29	32151	0.94	52	618.288	32151	0.936119
AFVG_25M402	25	4b570ca2-6005-42b4-98c7-af6652e49b44	672_1	FALSE	59868	3842	0.368	20	137	296.98	40686	0.68	95	559.168	53121	0.887302
AFVG_25M403	25	28fc0c0c-d4d6-4a42-a123-ea2e2290ef68	673_4	TRUE	33108	1667	0.312	33	72	441.92	31818	0.96	68	478.059	32508	0.981877
AFVG_25M404	25	64bdfe9b-954e-4866-a8ef-80953daf727f	677_1	TRUE	43673	194	0.397	14	75	482.8	36210	0.83	55	729.873	40143	0.919172
AFVG_25M405	25	2efd1e68-19b8-46e6-aea6-11c1c08fc66c	679_1	FALSE	39076	292	0.331	12	90	356.33	32070	0.82	79	459.076	36267	0.928114
AFVG_25M406	25	9152d1e3-39ec-4d4b-b51b-35566411ec75	681_1	FALSE	34762	234	0.356	20	66	479.82	31668	0.91	56	596.839	33423	0.961481
AFVG_25M407	25	5453c830-b16a-4f93-b4a3-42899d323208	683_1	FALSE	31980	276	0.349	19	55	543	29865	0.93	47	642.128	30180	0.943715
AFVG_25M408	25	c02e13a9-0ce9-483e-8e67-d07b801bec15	684_2	FALSE	39542	223	0.366	17	59	608.59	35907	0.91	45	845.467	38046	0.962167
AFVG_25M409	25	6d60f185-a614-444c-b16f-c0770f2a77aa	686_1	FALSE	32812	270	0.341	70	46	650.93	29943	0.91	44	697.841	30705	0.935786
AFVG_25M410	25	dbd84e37-1ee8-4759-b9ae-1c5a53ab3839	688_3	FALSE	51190	162	0.335	28	89	520.69	46341	0.91	78	630.462	49176	0.960656
AFVG_25M411	25	e9cea44c-3a55-4150-b230-605ad8e5cfb1	690_1	FALSE	50666	253	0.329	11	111	373.92	41505	0.82	83	575.675	47781	0.943058
AFVG_25M412	25	7ee5f05b-f1a3-432b-b0dd-a57f12c9b15b	691_1	FALSE	33702	150	0.313	30	59	508.32	29991	0.89	54	570.167	30789	0.913566
AFVG_25M413	25	7de6c5eb-33e9-49fc-9792-d33f5b257f0c	694_1	FALSE	54085	275	0.368	15	97	481.86	46740	0.86	79	637.329	50349	0.930924
AFVG_25M414	25	dcf2f8e0-0736-4ae1-a31c-d6f3960e22b2	698_1	FALSE	43829	135	0.42	19	60	659.75	39585	0.9	59	702.305	41436	0.945401
AFVG_25M415	25	a8d7f5de-1b17-461f-a96c-5d51773d75fe	700_4	FALSE	36848	164	0.358	77	56	578.41	32391	0.88	43	797.86	34308	0.931068
AFVG_25M416	25	12693297-fe72-49d0-84f7-d4764700e7e9	706_2	FALSE	31332	377	0.366	38	52	559.79	29109	0.93	52	583.558	30345	0.968499
AFVG_25M417	25	b1664548-be5e-4489-a1bb-dcfdd1cde0a6	707_1	FALSE	31296	387	0.366	30	58	497.02	28827	0.92	56	537.321	30090	0.961465
AFVG_25M418	25	0c6ed199-cf2a-4768-a342-61ef18dfbb28	709_1	FALSE	44013	258	0.398	25	54	695.5	37557	0.85	48	816.188	39177	0.890123
AFVG_25M419	25	a36f80af-3c05-4c02-8991-36867df685c1	70_1	FALSE	32142	369	0.373	12	62	442.26	27420	0.85	59	491.898	29022	0.902931
AFVG_25M420	25	f327ce60-0c1b-4e3d-bf7e-dbf731abd0c5	710_1	FALSE	43872	267	0.398	13	68	538.99	36651	0.83	52	769.096	39993	0.911584
AFVG_25M421	25	ff67fdf9-83d7-4ffc-b1ae-18e88e292d58	711_3	FALSE	34395	239	0.407	25	48	627.12	30102	0.88	40	784.725	31389	0.912604
AFVG_25M422	25	6812c11b-aed5-412e-a447-8efcb326d9a7	712_3	FALSE	35659	140	0.425	16	57	537.26	30624	0.86	58	550.5	31929	0.895398
AFVG_25M423	25	26b3fb3a-16de-463d-90de-94666871ddf0	717_4	TRUE	33647	1773	0.309	49	75	416.36	31227	0.93	78	411.615	32106	0.954201
AFVG_25M424	25	2a29679e-a536-4785-9320-cdec325ae91b	717_5	TRUE	33363	1498	0.308	21	80	382.24	30579	0.92	79	383.886	30327	0.909001
AFVG_25M425	25	6f5a8528-776f-41a8-b02b-d0f62e13b43d	717_6	TRUE	33245	1367	0.31	18	85	349.45	29703	0.89	87	341.966	29751	0.894901
AFVG_25M426	25	f82b076b-cb32-434c-88d9-2cc2bf3deb3b	718_1	TRUE	32588	1699	0.324	22	76	395.25	30039	0.92	63	499.571	31473	0.965785
AFVG_25M427	25	ec7a4723-1e1c-49fd-b287-64ae6346b712	720_1	FALSE	59920	193	0.37	24	94	574.47	54000	0.9	77	738.273	56847	0.948715
AFVG_25M428	25	5601d3d3-d49f-4915-8a47-7361ff99d8c0	722_3	FALSE	33905	229	0.469	26	52	592.44	30807	0.91	49	627.796	30762	0.9073
AFVG_25M429	25	40dd812f-2847-4f3c-b2a6-4b5ab5b68820	722_5	FALSE	34181	230	0.469	32	53	567.17	30060	0.88	49	628.837	30813	0.901466
AFVG_25M430	25	6489ecb9-369f-4a08-9d43-eb8232d489f6	725_5	FALSE	38480	166	0.348	44	54	659.89	35634	0.93	44	829.568	36501	0.948571
AFVG_25M431	25	ffc6e20b-f081-4840-aa1b-f63c899179ac	726_2	FALSE	41071	563	0.347	20	72	493.67	35544	0.87	67	560.687	37566	0.91466
AFVG_25M432	25	01b38a55-9827-4122-abbe-c8ea0b30a7ee	727_1	FALSE	50575	180	0.335	12	112	374.95	41994	0.83	81	592.741	48012	0.949323
AFVG_25M433	25	26414df4-fc0d-4516-b501-3c88c076a0c2	729_2	FALSE	34146	126	0.443	12	69	434.96	30012	0.88	60	540.35	32421	0.949482
AFVG_25M434	25	6bfe469d-d6b5-45a4-b5cc-091beed71a00	72_1	FALSE	37167	189	0.334	73	75	464.96	34872	0.94	68	520.941	35424	0.953104
AFVG_25M435	25	e47cceae-40b8-40a0-b6fe-46fece1995ef	731_1	FALSE	33441	500	0.412	33	63	500.14	31509	0.94	54	591.111	31920	0.954517
AFVG_25M436	25	a7412bcc-fdbb-48a7-9864-431822c767b8	734_2	FALSE	33069	143	0.416	12	59	483.51	28527	0.86	49	623.449	30549	0.923796
AFVG_25M437	25	3312be61-302f-4bd7-baf6-c75dee695263	73_2	FALSE	32945	287	0.331	13	64	463.5	29664	0.9	62	483.726	29991	0.910335
AFVG_25M438	25	e9a6dc88-c64e-43cf-a862-ff1184167fbf	73_3	FALSE	33224	283	0.333	48	57	545.58	31098	0.94	57	554.842	31626	0.951902
AFVG_25M439	25	af9df215-0b68-49a1-921d-3e7232ce623c	743_1	FALSE	31560	139	0.365	10	67	399	26733	0.85	58	504	29232	0.926236
AFVG_25M440	25	6a0f4f16-220d-4ea7-90fd-109ce0b49f18	745_1	FALSE	56471	294	0.318	15	119	413.39	49194	0.87	91	595.253	54168	0.959218
AFVG_25M441	25	04f97dd3-bc24-45ef-82cc-f8db871760f0	748_5	FALSE	36593	180	0.33	26	70	463.59	32451	0.89	58	579.31	33600	0.918208
AFVG_25M442	25	546bc51e-dbf3-4809-967a-9236a1a9401e	749_3	FALSE	33785	289	0.332	53	59	542.34	31998	0.95	55	596.4	32802	0.970904
AFVG_25M443	25	d1e14903-c940-4333-bf32-c6b0a3d82afd	751_1	FALSE	43762	217	0.419	16	61	645.15	39354	0.9	56	734.518	41133	0.939925
AFVG_25M444	25	1284212e-530a-441b-93b2-8e7afa45f6c2	751_4	FALSE	43934	129	0.419	21	57	722.32	41172	0.94	52	801.808	41694	0.949014
AFVG_25M445	25	5a735129-985d-44c5-b151-aa32453c2a31	752_3	FALSE	52118	160	0.333	13	100	450.57	45057	0.86	77	649.87	50040	0.960129
AFVG_25M446	25	dada5af7-beb5-45a9-a8da-4d0172e16ba7	753_1	FALSE	37967	171	0.345	18	56	592.5	33180	0.87	54	637.167	34407	0.906234
AFVG_25M447	25	9ebc0550-076e-4196-ad15-c8c08fb5a162	755_3	FALSE	36611	242	0.366	20	72	451.79	32529	0.89	70	489.3	34251	0.935538
AFVG_25M448	25	cbdf3fef-e807-4a3d-90ce-dde6f70aa535	757_1	FALSE	36481	205	0.329	11	68	461.69	31395	0.86	54	619.722	33465	0.917327
AFVG_25M449	25	20e69edb-5a12-4a44-ba1e-d300274d5a00	760_3	FALSE	56212	212	0.387	10	108	435.06	46986	0.84	75	709.88	53241	0.947147
AFVG_25M450	25	7fcc5e03-2916-4e8e-8084-af1b30e67720	762_3	FALSE	33199	259	0.341	21	56	553.02	30969	0.93	52	595.673	30975	0.93301
AFVG_25M451	25	a24ecbdc-3fe6-47f8-aad8-77b38f26de73	762_4	FALSE	33361	246	0.34	27	57	537.21	30621	0.92	54	576.611	31137	0.933335
AFVG_25M452	25	f1e2587e-8ce4-41bf-b82f-da69a6c9faea	768_3	FALSE	32553	155	0.36	23	62	478.26	29652	0.91	56	559.125	31311	0.961847
AFVG_25M453	25	24c6aa43-9dc9-48be-8420-148c4cf9a0f6	770_1	FALSE	35944	170	0.374	12	78	372	29016	0.81	60	534.3	32058	0.891887
AFVG_25M454	25	be66ac47-59c5-404e-ac79-6fd16797cb13	771_1	FALSE	33734	174	0.362	11	75	361.72	27129	0.8	69	441.087	30435	0.902205
AFVG_25M455	25	4ded63e8-2ca2-41d8-bc38-08bf2ad8738e	772_2	FALSE	42997	136	0.42	21	58	674.12	39099	0.91	52	777.346	40422	0.940112
AFVG_25M456	25	829f7504-a76e-4b79-bf07-2525e3ba96f6	775_4	FALSE	43733	217	0.419	117	56	741.11	41502	0.95	51	817	41667	0.952759
AFVG_25M457	25	56df7d2a-fdfe-4020-8652-46f54324a57e	778_1	FALSE	34464	255	0.457	18	61	451.97	27570	0.8	45	653.333	29400	0.853064
AFVG_25M458	25	76ff1fc0-a427-4a8e-b285-c791479d3a86	785_1	FALSE	31504	306	0.354	33	59	463.73	27360	0.87	57	497.895	28380	0.900838
AFVG_25M459	25	806da548-9d86-4fdd-8a06-4c97b68a4abe	786_1	FALSE	35189	247	0.423	13	63	477.62	30090	0.86	61	505.475	30834	0.87624
AFVG_25M460	25	7cf88bbd-b0a2-4bf3-ab1f-cc4ba9a7eab0	78_2	FALSE	37581	164	0.347	17	74	428.51	31710	0.84	54	622.111	33594	0.893909
AFVG_25M461	25	3c40db38-a1a1-43cd-92c9-93fd141cd4c7	790_1	FALSE	44710	199	0.412	16	63	582.71	36711	0.82	52	797.827	41487	0.927913
AFVG_25M462	25	08428d67-6a14-4dab-bd40-f53e001e6b89	791_1	FALSE	43635	136	0.413	15	64	613.17	39243	0.9	54	772.5	41715	0.955999
AFVG_25M463	25	eb4c0bcb-9b95-4bf8-8765-7ed4a09c2830	793_1	FALSE	33366	141	0.429	29	56	530.04	29682	0.89	55	549.109	30201	0.905143
AFVG_25M464	25	7fea3172-759d-4d94-b3b7-6dc1725b6260	793_2	FALSE	33040	135	0.429	22	53	543.11	28785	0.87	54	536.056	28947	0.87612
AFVG_25M465	25	4fa1ede0-da69-448b-ae22-e95171d5047f	795_1	TRUE	33053	1618	0.313	35	70	447.43	31320	0.95	70	454.457	31812	0.962454
AFVG_25M466	25	3740887c-6dd4-448c-8326-353ab4158fae	795_2	TRUE	32769	1341	0.312	24	67	433.39	29037	0.89	67	435.806	29199	0.891056
AFVG_25M467	25	f2547549-fdeb-46b6-878b-96f54895a6c1	796_2	FALSE	43764	205	0.413	43	59	684.97	40413	0.92	59	707.542	41745	0.953866
AFVG_25M468	25	eeb9dd03-d7cd-4216-9f92-d108734d7d1c	797_2	FALSE	32292	168	0.468	77	49	605.14	29652	0.92	47	647.809	30447	0.942865
AFVG_25M469	25	b4e37267-8abd-4a20-a544-a4fcb1dbb5a1	799_1	FALSE	34227	176	0.407	58	57	568.63	32412	0.95	52	627.75	32643	0.953721
AFVG_25M470	25	ffd3a177-896f-4637-80aa-87f4f930ac7f	79_2	FALSE	31478	369	0.356	10	69	397.3	27414	0.87	43	712.186	30624	0.97287
AFVG_25M471	25	f6f20301-f101-4429-8085-37c9e20e7066	802_2	FALSE	33587	221	0.505	10	63	452.62	28515	0.85	53	577.981	30633	0.912049
AFVG_25M472	25	0f7e1843-dd1d-4167-a171-5c944e7175cc	802_4	FALSE	33297	212	0.507	18	53	560.72	29718	0.89	50	617.52	30876	0.927291
AFVG_25M473	25	2ff1ec90-9702-4439-b491-392d3ddadd14	804_1	FALSE	43519	136	0.417	20	56	706.55	39567	0.91	52	784.788	40809	0.937728
AFVG_25M474	25	97281990-e428-4539-a6db-9c5ffb93c516	80_2	FALSE	33643	237	0.405	24	55	550.58	30282	0.9	48	646.125	31014	0.921856
AFVG_25M475	25	11b219a5-5013-4ce0-a44d-4a86f70e08af	810_1	FALSE	32145	366	0.359	68	59	518.54	30594	0.95	58	533.638	30951	0.962856
AFVG_25M476	25	29462c83-8f16-4495-a33e-f20ba9d56786	810_2	FALSE	32118	366	0.358	69	54	569.94	30777	0.96	52	600.231	31212	0.971792
AFVG_25M477	25	258c1a08-76b6-466e-a344-7f7e1bb16e5e	814_6	TRUE	40183	1202	0.378	23	84	427.75	35931	0.89	82	445.244	36510	0.908593
AFVG_25M478	25	19cbc8ce-bc0c-45eb-a157-1ddf6a0977f2	814_7	TRUE	39933	788	0.378	64	73	490.03	35772	0.9	72	513.792	36993	0.926377
AFVG_25M479	25	ade6654e-619a-4ac6-a011-fa7a741354b8	816_1	FALSE	35980	321	0.516	37	57	560.89	31971	0.89	44	752.795	33123	0.920595
AFVG_25M480	25	1591a1a1-3a99-4e2d-9496-e59d3994861c	818_1	FALSE	60072	307	0.352	22	109	489.61	53367	0.89	97	577.082	55977	0.931832
AFVG_25M481	25	0d61baa1-ae8c-44a3-8e64-480f3f4d0070	818_4	FALSE	59832	286	0.351	12	125	399.41	49926	0.83	101	551.198	55671	0.930455
AFVG_25M482	25	a3105f18-7c1c-4297-b6b7-ed2c2fceba1e	819_1	FALSE	41536	187	0.347	20	72	517.96	37293	0.9	59	648.305	38250	0.920888
AFVG_25M483	25	b2d4cd86-d315-483b-aca5-3aa27bde8494	81_3	FALSE	32486	213	0.35	55	51	586.06	29889	0.92	47	663.383	31179	0.959767
AFVG_25M484	25	eda6dc9f-adab-46ca-80a7-58496fd05b63	822_1	FALSE	43177	182	0.528	19	59	681.81	40227	0.93	44	894.341	39351	0.911388
AFVG_25M485	25	26888960-6db2-4af9-89a7-e66250c0e213	823_1	FALSE	32497	215	0.369	24	78	328.85	25650	0.79	46	666.457	30657	0.943379
AFVG_25M486	25	98d68341-e99a-4977-9d3b-2913f3f3f403	825_2	FALSE	52912	204	0.331	17	91	516.69	47019	0.89	81	625.889	50697	0.958138
AFVG_25M487	25	e77ee59c-c77c-480a-96b0-a2b05d3644cf	827_1	FALSE	44596	475	0.474	16	76	502.34	38178	0.86	63	650.952	41010	0.919589
AFVG_25M488	25	d2335669-4f21-4210-9051-7f49deb95255	82_2	FALSE	36774	181	0.361	58	68	470.34	31983	0.87	48	696.25	33420	0.908794
AFVG_25M489	25	c7b699b3-3d2c-4021-b55c-77a5dbf29652	83_1	FALSE	36637	218	0.32	21	69	445.26	30723	0.84	64	510.375	32664	0.891558
AFVG_25M490	25	32a89b49-6bcf-4a07-bfcb-dd863ad97bc1	83_2	FALSE	36872	217	0.32	22	75	419.68	31476	0.85	67	520.567	34878	0.945921
AFVG_25M491	25	810794a4-e933-42a2-9dad-71b6c06e1724	845_1	FALSE	58607	243	0.363	17	113	441.08	49842	0.85	87	634.828	55230	0.942379
AFVG_25M492	25	6de2a2e4-c748-4757-889e-237fde711341	848_3	FALSE	34313	1312	0.448	50	50	599.04	29952	0.87	47	652.149	30651	0.893277
AFVG_25M493	25	326e4ec2-a895-43e2-903f-2f18430f68b5	84_1	FALSE	31469	172	0.472	49	45	650.53	29274	0.93	46	644.348	29640	0.941879
AFVG_25M494	25	ee44f041-8933-41e2-94f7-fb6cf93dd9d7	850_1	FALSE	30538	229	0.416	45	47	584.36	27465	0.9	48	583.438	28005	0.917054
AFVG_25M495	25	fa2de12b-94cc-45d1-b5e5-e17efd28a4bc	856_1	FALSE	37209	176	0.355	10	70	455.06	31854	0.86	50	690.96	34548	0.928485
AFVG_25M496	25	f3d2d7a5-8b4e-4ec1-bec0-718feee64a29	858_1	FALSE	31022	428	0.364	50	53	538.42	28536	0.92	47	644.809	30306	0.97692
AFVG_25M497	25	c3427dce-e41d-4712-b968-60cdfa681591	85_1	FALSE	31088	170	0.472	11	50	542.88	27144	0.87	49	553.102	27102	0.871783
AFVG_25M498	25	24d8f687-a94b-4f6b-958d-95ec7f8d95ef	85_5	FALSE	31471	173	0.473	90	48	610.56	29307	0.93	48	618.688	29697	0.943631
AFVG_25M499	25	2d83b0a5-5da0-412d-b573-1c9639365b09	85_7	FALSE	31281	167	0.471	13	55	491.95	27057	0.86	50	540.3	27015	0.863623
AFVG_25M500	25	d5510c70-d2fb-4589-b6ea-08ef4593b764	85_8	FALSE	31668	171	0.472	51	50	589.38	29469	0.93	50	592.32	29616	0.935203
AFVG_25M501	25	1e1a04a8-dd5e-453f-81bb-96b203f88d56	85_9	FALSE	31666	168	0.473	45	46	606.85	27915	0.88	46	610.043	28062	0.886187
AFVG_25M502	25	5a31b7ee-e54c-4d16-b491-18d36f5a591b	864_1	FALSE	34727	91	0.346	10	72	423.12	30465	0.88	54	619.833	33471	0.963832
AFVG_25M503	25	d3c05180-e430-4d08-9d42-38912b166095	86_1	FALSE	59374	3661	0.366	16	109	455.5	49650	0.84	85	639.988	54399	0.916209
AFVG_25M504	25	9c61392e-6471-4dcd-b2e2-29977551cfef	870_2	FALSE	44921	212	0.417	25	66	585.91	38670	0.86	52	802.038	41706	0.92843
AFVG_25M505	25	4c59c956-439d-406d-8942-207a51b1f695	871_2	FALSE	37072	176	0.352	95	51	662.35	33780	0.91	46	750.522	34524	0.931269
AFVG_25M506	25	d25b4f36-65dc-49da-b5d0-c3a95b546787	872_1	FALSE	32979	156	0.354	27	59	515.64	30423	0.92	57	554.158	31587	0.957791
AFVG_25M507	25	b8690f5f-05eb-4157-b6fe-1396dacb9898	876_1	FALSE	35678	216	0.324	20	66	383.64	25320	0.71	59	552.254	32583	0.913252
AFVG_25M508	25	93ddc49e-0999-40ca-a20e-88db49b7f5c4	879_2	FALSE	34874	154	0.474	21	61	522.69	31884	0.91	55	580.364	31920	0.915295
AFVG_25M509	25	4e90b751-e087-4308-b92e-e43599f5457a	87_1	FALSE	34695	230	0.561	79	57	568.11	32382	0.93	53	613.302	32505	0.936879
AFVG_25M510	25	400012b0-ed59-4f5f-accb-08f19554bc64	87_5	FALSE	34039	224	0.56	26	61	515.56	31449	0.92	58	556.759	32292	0.948677
AFVG_25M511	25	f8e61035-d609-45a5-9e8c-397c166bbf4d	884_1	FALSE	36972	177	0.35	21	59	556.17	32814	0.89	47	739.915	34776	0.940604
AFVG_25M512	25	c3e539de-012c-47c8-b498-31615f143c5e	885_1	FALSE	35021	221	0.321	10	87	336.34	29262	0.83	67	492	32964	0.941264
AFVG_25M513	25	362bf22c-4351-44bc-a70b-e5a39416cd5f	887_2	FALSE	37498	287	0.334	32	81	400.74	32460	0.87	79	445.177	35169	0.93789
AFVG_25M514	25	c2f648d8-0cb8-471d-93b0-c975fb16819a	887_3	FALSE	37187	285	0.333	43	77	417.04	32112	0.86	74	453.203	33537	0.901847
AFVG_25M515	25	54bb8906-59a8-4529-8cea-4d2abdda596e	887_4	FALSE	37572	285	0.333	29	79	439.82	34746	0.92	75	469.84	35238	0.937879
AFVG_25M516	25	a6a07c7b-5b2c-48ef-980a-469fa8b6dbb6	892_1	FALSE	41803	204	0.351	13	70	505.2	35364	0.85	56	667.929	37404	0.894768
AFVG_25M517	25	ccec5442-a252-4b31-8242-62c76722bf15	893_1	FALSE	37418	224	0.536	19	58	582.62	33792	0.9	52	673.385	35016	0.935806
AFVG_25M518	25	2c87f5aa-95ef-4d7a-93ff-c6340e1e1507	898_1	FALSE	36701	176	0.358	50	47	715.91	33648	0.92	45	767.4	34533	0.940928
AFVG_25M519	25	c6fc6687-91a0-4690-b63c-230b0c80ea6f	899_2	FALSE	37276	168	0.357	25	55	615.65	33861	0.91	47	736.851	34632	0.92907
AFVG_25M520	25	150a423d-36d0-43cb-a92b-e4d4b6c821eb	89_1	FALSE	32791	431	0.373	11	76	361.14	27447	0.84	58	540.983	31377	0.956878
AFVG_25M521	25	4cd8ec8c-2c24-424b-b26a-7e5b1af88ff9	900_1	FALSE	37445	159	0.356	17	57	564	32148	0.86	45	782.8	35226	0.94074
AFVG_25M522	25	a890aa02-8cd5-41e9-9add-8b03ba31ccc6	903_3	TRUE	30499	1631	0.364	15	66	411	27126	0.89	65	426.415	27717	0.908784
AFVG_25M523	25	289d73cb-d839-4cf7-9bb5-4ad89b0c88b6	903_4	TRUE	30809	1936	0.366	17	71	377.7	26817	0.87	70	387	27090	0.879289
AFVG_25M524	25	aacf6bc6-9325-4e87-bb0b-30db4079a1b9	903_5	TRUE	30647	1777	0.366	16	72	378.96	27285	0.89	67	405.672	27180	0.886873
AFVG_25M525	25	7ebb958e-12f4-48fc-8939-94bb89798e02	903_6	TRUE	30958	2091	0.365	27	63	447.95	28221	0.91	59	478.881	28254	0.912656
AFVG_25M526	25	8895cedb-00fc-44dd-85ef-18e0e8c6f87a	903_8	TRUE	30843	1960	0.364	12	71	355.06	25209	0.82	67	380.776	25512	0.827157
AFVG_25M527	25	aaa79aa0-03dd-4b4c-afaa-61b60da293d2	90_14	FALSE	40962	359	0.36	32	69	519.35	35835	0.87	65	566.077	36795	0.898272
AFVG_25M528	25	2583f580-6389-4a61-b3bd-b6d8c7d5e016	90_19	FALSE	40630	359	0.36	131	65	569.82	37038	0.91	64	584.906	37434	0.921339
AFVG_25M529	25	829127b5-aa7b-4ace-9821-10d04876809d	90_20	FALSE	40637	359	0.36	51	66	553.86	36555	0.9	66	562.591	37131	0.913724
AFVG_25M530	25	cbd63a9c-ed91-4dc9-91a8-04bd0a855dd2	90_21	FALSE	40630	356	0.36	240	64	569.86	36471	0.9	63	582.333	36687	0.902953
AFVG_25M531	25	f7ed5525-d13b-42a5-9d65-f0df0e15ce37	910_1	FALSE	35181	214	0.441	108	53	618.11	32760	0.93	50	668.04	33402	0.949433
AFVG_25M532	25	9c2d81ea-29f2-4bb2-8d55-2e7a39413aa5	910_2	FALSE	35175	213	0.441	21	52	610.56	31749	0.9	49	666.184	32643	0.928017
AFVG_25M533	25	d683bf1f-7835-4d84-ad52-38a272499a6d	911_1	FALSE	36620	164	0.349	17	59	532.47	31416	0.86	49	697.837	34194	0.933752
AFVG_25M534	25	95e0ffcf-4244-43b4-800c-20326afaacee	914_1	FALSE	40969	129	0.397	14	60	606.65	36399	0.89	49	785.082	38469	0.938978
AFVG_25M535	25	1f826c06-c03e-4887-819f-ca015e386e18	918_2	FALSE	34112	196	0.328	25	75	406.6	30495	0.89	62	521.371	32325	0.947614
AFVG_25M536	25	5bceeb13-aa44-47fe-81f2-fabb16e5a23e	919_1	FALSE	34832	206	0.324	24	77	409.52	31533	0.9	65	509.954	33147	0.951625
AFVG_25M537	25	dd49f793-56ef-4b87-adfd-d315299e3318	921_4	TRUE	36049	1350	0.364	12	72	400.42	28830	0.8	73	416.959	30438	0.844351
AFVG_25M538	25	ee07694d-35fb-475d-8540-7e65a6e69e56	921_5	TRUE	35719	1009	0.365	19	73	425.01	31026	0.87	68	479.029	32574	0.911952
AFVG_25M539	25	474e2a64-2ab8-4d31-911c-54c59d9f3ed9	923_1	FALSE	34325	224	0.32	20	72	422.46	30417	0.89	63	518.524	32667	0.951697
AFVG_25M540	25	b3f92a3e-461c-4a06-8add-5f2952807f92	926_1	TRUE	32716	1932	0.313	39	74	400.42	29631	0.91	67	465.493	31188	0.953295
AFVG_25M541	25	721c66d8-55ff-49b5-9685-50124e5881c5	933_1	FALSE	44223	139	0.421	21	58	709.86	41172	0.93	56	754.982	42279	0.956041
AFVG_25M542	25	ec33efa1-4419-4d84-9d55-d6c394e4d143	934_2	FALSE	37080	175	0.363	49	50	664.44	33222	0.9	44	791.591	34830	0.93932
AFVG_25M543	25	18bf69ed-fa7f-4693-911c-6360ee7dab2b	935_1	FALSE	60520	3111	0.429	21	109	515.83	56226	0.93	82	705.073	57816	0.955321
AFVG_25M544	25	3390c44e-01ef-44c1-ae9a-c0ace07e439c	938_2	FALSE	44122	137	0.416	24	55	705.27	38790	0.88	44	918.682	40422	0.916142
AFVG_25M545	25	e068d29f-94b6-4af6-af85-3aa8e539e648	93_1	FALSE	32788	380	0.348	24	65	452.26	29397	0.9	57	542.684	30933	0.943424
AFVG_25M546	25	e6ad1044-fb51-4108-a654-a0a78ebc922a	952_1	FALSE	36304	218	0.459	53	57	597.79	34074	0.94	56	621.857	34824	0.959233
AFVG_25M547	25	48d788fe-3a9c-416e-8b3c-f012649adefc	952_10	FALSE	36237	216	0.459	31	58	608.53	35295	0.97	58	609.207	35334	0.975081
AFVG_25M548	25	c9a12297-d3e2-4364-8f0c-56606758fe26	952_12	FALSE	36235	217	0.459	90	55	634.2	34881	0.96	55	638.509	35118	0.969173
AFVG_25M549	25	7f664156-00ea-4387-acde-4b6e953bb387	952_3	FALSE	36338	217	0.459	10	65	489.83	31839	0.88	67	482.015	32295	0.888739
AFVG_25M550	25	342f88a1-6ee1-494a-a8f4-f32b8d3acf3d	955_1	FALSE	40014	496	0.357	39	67	524.6	35148	0.88	65	562.938	36591	0.914455
AFVG_25M551	25	8564e4fa-2dbe-4aa5-bcea-a4cfeff7de3c	95_4	FALSE	31069	130	0.447	49	39	740.92	28896	0.93	39	742.462	28956	0.93199
AFVG_25M552	25	1bce3d09-55f7-43e6-a820-75059a62d036	95_5	FALSE	31548	137	0.448	27	38	767.37	29160	0.92	38	769.816	29253	0.927254
AFVG_25M553	25	883255c6-8e69-4892-84fc-c4f2d431d844	963_3	FALSE	42223	563	0.354	26	76	472.86	35937	0.85	64	603.844	38646	0.915283
AFVG_25M554	25	476f14e4-b99b-4069-bbca-2e394731098b	968_1	TRUE	38706	1454	0.381	36	77	443.14	34122	0.88	75	480.56	36042	0.931173
AFVG_25M555	25	027aa2c0-d7f2-4575-8578-3cd3af1a48b8	970_1	FALSE	39115	235	0.333	26	70	470.23	32916	0.84	64	573.562	36708	0.938464
AFVG_25M556	25	cc511f8d-9e17-4831-bb1f-2314013ae920	971_4	FALSE	34241	229	0.427	36	55	582.55	32040	0.94	53	610.642	32364	0.945183
AFVG_25M557	25	1f836a32-c220-4372-aaeb-6529a6ec9cf0	971_5	FALSE	34443	229	0.428	36	60	541.05	32463	0.94	58	564.569	32745	0.950701
AFVG_25M558	25	d1c01712-c4fc-473c-acd4-5590cc6c339c	974_1	FALSE	51160	236	0.336	10	94	466.44	43845	0.86	79	611.696	48324	0.944566
AFVG_25M559	25	81db033e-7dd9-4cd1-8f7b-66b25dc7093b	981_1	FALSE	53811	202	0.321	28	91	533.67	48564	0.9	83	623.53	51753	0.961755
AFVG_25M560	25	1d8006ec-22b4-487b-882e-5cf497462af1	983_1	FALSE	35918	175	0.329	10	80	361.69	28935	0.81	68	499.5	33966	0.945654
AFVG_25M561	25	287ac729-4a34-46b5-b986-f179e0029d10	985_2	FALSE	33390	213	0.334	15	76	295.54	22461	0.67	63	491.333	30954	0.927044
AFVG_25M562	25	e41000c5-6243-4727-9e29-beceec25724c	990_1	FALSE	56094	239	0.344	12	122	378.93	46230	0.82	83	650.892	54024	0.963098
AFVG_25M563	25	63be1641-423a-43b1-8e46-852207743d17	996_1	FALSE	53325	204	0.386	12	91	498.16	45333	0.85	76	664.895	50532	0.947623
AFVG_25M564	25	3756d44e-3bb4-4625-8801-e07b030b4570	999_1	FALSE	41311	500	0.362	42	71	530.28	37650	0.91	70	542.614	37983	0.91944
AFVG_25M565	25	e68e6b05-5671-4515-99f3-7676d66cf329	999_3	FALSE	40967	500	0.362	12	80	431.06	34485	0.84	79	440.848	34827	0.850123
AFVG_25M566	25	c579a548-b9fe-453a-8ee4-67b3e450fa3c	9_1	FALSE	34733	142	0.355	96	55	558.98	30744	0.88	53	592.811	31419	0.904586
AFVG_117M1	117	44b58895-ff0a-48bd-8d07-e14a70aeb55c	111_1	FALSE	44067	98	0.407	11	75	441.64	33123	0.75	57	669.632	38169	0.866158
AFVG_117M2	117	21a66ce7-57e4-4609-a1d1-200ba898bce4	115_2	FALSE	47697	170	0.383	39	62	705.39	43734	0.92	62	730.306	45279	0.949305
AFVG_117M3	117	e736cac1-f355-45d8-a7ad-21841cd00015	119_1	FALSE	65341	2938	0.36	21	123	466.15	57336	0.88	87	686.172	59697	0.913622
AFVG_117M4	117	92829c9f-64ff-4dc1-a2d7-8f0223fb32fd	11_1	TRUE	30870	1621	0.513	28	53	509.6	27009	0.87	50	540.24	27012	0.875024
AFVG_117M5	117	f53f99d7-c514-43a8-98d5-92c397d61f52	11_5	TRUE	31313	1762	0.512	36	48	547	26256	0.84	44	593.25	26103	0.833615
AFVG_117M6	117	a822ff17-bfc5-4728-82b3-42c52f2176dd	123_1	FALSE	48541	169	0.374	18	66	686.41	45303	0.93	65	707.4	45981	0.947261
AFVG_117M7	117	c8d6c494-d88b-4194-8de1-a1eb89b12661	124_2	FALSE	38755	195	0.335	27	69	516.74	35655	0.92	61	587.656	35847	0.924965
AFVG_117M8	117	fe0194b6-c615-45f9-8492-1abc7b26768e	126_3	FALSE	58350	512	0.327	22	108	486.22	52512	0.9	97	562.515	54564	0.935116
AFVG_117M9	117	ad816fe5-9087-4ee4-b88c-f797ae24de19	130_1	FALSE	54058	278	0.37	15	98	488.79	47901	0.89	95	512.053	48645	0.899867
AFVG_117M10	117	b80422ae-36ee-4859-ab07-538170597095	134_2	FALSE	38011	160	0.332	20	59	582.2	34350	0.9	58	592.397	34359	0.903923
AFVG_117M11	117	c53e42ed-d23c-471e-aac4-68fd1af5cfd0	137_1	FALSE	42841	207	0.345	28	62	633.34	39267	0.92	55	731.836	40251	0.939544
AFVG_117M12	117	9ecded3b-886a-47b1-bce2-8e78086bce74	139_2	FALSE	55403	657	0.432	30	84	583.36	49002	0.88	85	606.953	51591	0.931195
AFVG_117M13	117	abd02264-0746-4d28-8a65-44d802234b25	142_1	TRUE	41394	1364	0.357	17	88	403.88	35541	0.86	74	532.014	39369	0.95108
AFVG_117M14	117	fd83c305-3b36-455c-877f-5bcc9ca0e5d7	147_1	FALSE	36101	161	0.337	10	86	317.44	27300	0.76	85	319.165	27129	0.751475
AFVG_117M15	117	1062d614-9b56-4b9a-9d11-e68f2c704b30	14_3	FALSE	41963	298	0.495	75	67	559.16	37464	0.89	64	580.453	37149	0.88528
AFVG_117M16	117	961d0f46-054a-48a6-b9e0-8cd92d7f17ac	14_4	FALSE	41962	299	0.496	58	67	551.46	36948	0.88	66	559	36894	0.879224
AFVG_117M17	117	4e638978-fb4c-4f25-86bb-950b64a8f7d9	155_1	FALSE	44653	177	0.41	39	45	940.2	42309	0.95	46	927.13	42648	0.955098
AFVG_117M18	117	e1221122-5cc8-47ea-8377-45e357867568	159_2	FALSE	40832	2111	0.406	26	61	609.2	37161	0.91	58	659.586	38256	0.936912
AFVG_117M19	117	60a50406-3154-49ae-90c7-3e2804486482	167_1	FALSE	63761	3537	0.408	17	101	549.21	55470	0.87	81	714.333	57861	0.907467
AFVG_117M20	117	2cd9f1e3-7cdc-41cd-8891-18c1cdbfd9c2	173_1	FALSE	34566	348	0.536	11	74	352.18	26061	0.75	48	645.688	30993	0.896633
AFVG_117M21	117	9012b70b-0dcf-4611-9cd8-e0423ec1dc6f	174_2	FALSE	45577	243	0.383	30	53	793.02	42030	0.92	52	822.577	42774	0.9385
AFVG_117M22	117	cd987315-c430-49e0-b24f-1091ccd202c0	177_1	FALSE	45228	596	0.318	18	86	468.52	40293	0.89	67	624.313	41829	0.924847
AFVG_117M23	117	1d3f6457-459c-491d-9e41-bec716533a9c	179_1	FALSE	40934	118	0.393	13	67	548.46	36747	0.9	50	777.24	38862	0.949382
AFVG_117M24	117	d078938e-5e73-418e-ba04-924441365efb	181_2	FALSE	47753	188	0.399	19	62	720.87	44694	0.94	59	754.881	44538	0.932674
AFVG_117M25	117	4558cfc0-8f43-4f29-93e6-391f0948be97	182_1	FALSE	40007	122	0.392	16	56	667.82	37398	0.93	51	747.647	38130	0.953083
AFVG_117M26	117	09fc230a-570c-481a-a5a0-fdc9cd25d082	191_1	FALSE	37913	285	0.376	68	67	490.84	32886	0.87	56	609	34104	0.899533
AFVG_117M27	117	97467e28-f7f2-415b-b936-37f8583fe525	192_2	FALSE	36904	284	0.375	57	56	547.45	30657	0.83	53	618	32754	0.887546
AFVG_117M28	117	2f292c34-fcb4-4c4a-9a74-287bb0cfec9a	196_1	FALSE	59664	162	0.355	17	129	396.44	51141	0.86	94	606.926	57051	0.956205
AFVG_117M29	117	2a66a5c0-e34e-40e4-9d01-2f49f60a9321	200_1	FALSE	57570	323	0.501	14	91	537.46	48909	0.85	93	533.484	49614	0.861803
AFVG_117M30	117	24b9366b-f600-42fe-950f-0e35bb351c5f	204_1	FALSE	63932	1982	0.366	12	118	451.73	53304	0.83	110	524.7	57717	0.902787
AFVG_117M31	117	29ee0761-ff20-4fb4-acba-55fdcfd98d58	20_2	FALSE	44467	160	0.385	14	53	764.26	40506	0.91	51	807.882	41202	0.926575
AFVG_117M32	117	df437d85-6cf0-4a42-806b-021c26d222d2	215_1	FALSE	62592	3548	0.36	59	108	537.89	58092	0.93	103	573.612	59082	0.943923
AFVG_117M33	117	a921ddc0-25d5-4c0c-b3ac-e8904a814bab	21_3	FALSE	43716	160	0.375	40	53	768.17	40713	0.93	51	802.118	40908	0.935767
AFVG_117M34	117	62e592b8-d362-46e2-a668-864712747e76	223_1	FALSE	39933	116	0.394	11	55	653.45	35940	0.9	53	680.604	36072	0.903313
AFVG_117M35	117	1a8ea395-7d43-4ed9-a5af-6429d7a836c8	224_1	FALSE	39890	120	0.397	52	46	808.63	37197	0.93	44	868.023	38193	0.957458
AFVG_117M36	117	52af0f4a-28bb-4697-ae4c-5272ed7af992	229_1	FALSE	47204	188	0.405	11	75	554.36	41577	0.88	64	687	43968	0.931446
AFVG_117M37	117	c4e8c6f9-bf4f-4526-93cf-5f503df75350	237_1	FALSE	62217	307	0.336	29	143	365.5	52266	0.84	134	422.373	56598	0.909687
AFVG_117M38	117	d3f8539f-0636-49de-b15d-76396956a894	238_1	FALSE	51960	531	0.324	13	81	556.63	45087	0.87	61	802.18	48933	0.941744
AFVG_117M39	117	46f78732-2ac4-467d-80fd-dff286e7c73a	23_5	FALSE	35224	761	0.475	18	55	482.67	26547	0.75	54	573.667	30978	0.879457
AFVG_117M40	117	6f60b134-b598-4b97-9d5e-7c6c6bfb19d7	252_2	FALSE	40351	149	0.407	14	58	650.74	37743	0.93	49	782.449	38340	0.950162
AFVG_117M41	117	c1579728-78c1-411c-b1b2-98bfe250f787	253_2	FALSE	62568	3622	0.356	25	118	488.39	57630	0.92	112	511.018	57234	0.914749
AFVG_117M42	117	cc3ae693-48b1-4803-9253-d46ffb87de95	263_2	FALSE	63450	3200	0.36	25	104	542.37	56406	0.89	100	573.81	57381	0.90435
AFVG_117M43	117	f67d9b51-0b64-4f64-a33f-4b800751abc7	266_1	FALSE	47150	171	0.385	10	80	525.41	42033	0.89	73	602.548	43986	0.932895
AFVG_117M44	117	dd20d493-23c2-49e7-8bbe-cc5a50589121	26_3	FALSE	38093	77	0.351	14	85	212.4	18054	0.48	61	569.607	34746	0.912136
AFVG_117M45	117	e3b9e991-1d38-435c-b3c7-7b474fd16f90	272_2	FALSE	39612	136	0.472	17	72	462.71	33315	0.84	52	714.173	37137	0.937519
AFVG_117M46	117	d423a7a3-9317-42b3-b1ea-841c31c9d0fa	274_3	FALSE	61948	4017	0.356	34	122	430.62	52536	0.85	108	516.611	55794	0.900659
AFVG_117M47	117	06a2750c-3b26-4d47-98b7-c60f1a65ea95	278_1	TRUE	46211	126	0.403	12	69	609.65	42066	0.91	61	706.82	43116	0.933025
AFVG_117M48	117	719986da-426c-464a-844a-f1653cc9a4f1	280_2	FALSE	59484	781	0.4	10	136	346.32	47100	0.79	133	367.241	48843	0.821112
AFVG_117M49	117	328af230-f48d-4c16-90ec-c45873b4bb57	285_1	FALSE	47012	186	0.383	16	65	651.05	42318	0.9	62	694.694	43071	0.91617
AFVG_117M50	117	d9f4ac72-a6b1-4922-92ff-27593be8fe05	29_1	FALSE	64450	2544	0.354	13	116	481.76	55884	0.87	105	545.171	57243	0.888177
AFVG_117M51	117	1887cde5-d63f-4e16-baf0-4c5934abba08	301_2	FALSE	47430	162	0.384	15	68	642.57	43695	0.92	66	676.727	44664	0.941682
AFVG_117M52	117	f7ede50b-fc04-4ca0-b8ec-08ee66da4d01	306_1	FALSE	52702	507	0.319	11	95	493.58	46890	0.89	65	756.692	49185	0.933266
AFVG_117M53	117	36829b0c-4a48-418a-b6f9-a9b52d1ec45a	313_2	FALSE	35861	150	0.366	11	76	254.76	19362	0.54	73	408.616	29829	0.831795
AFVG_117M54	117	edd16ee8-6c35-4f50-94de-66f04ea88ebc	314_1	FALSE	47894	201	0.394	14	72	604.29	43509	0.91	67	661.881	44346	0.92592
AFVG_117M55	117	0b9c26f2-adb4-4bbc-9b9f-65775c441ae6	317_1	FALSE	47697	171	0.393	21	70	626.91	43884	0.92	65	693.692	45090	0.945342
AFVG_117M56	117	94b45e25-7837-47df-b0e2-3a9c5d4b95f1	331_1	FALSE	63842	2073	0.351	33	122	484.65	59127	0.93	114	524.947	59844	0.937377
AFVG_117M57	117	82fd0bc5-a8d8-4b7d-8418-2c257187fa6b	331_2	FALSE	63696	1831	0.351	16	127	447.59	56844	0.89	118	490.347	57861	0.908393
AFVG_117M58	117	0846975d-29cf-482d-8fad-eb696765d176	338_2	FALSE	54839	524	0.351	12	87	560.72	48783	0.89	69	751.783	51873	0.945914
AFVG_117M59	117	134e567c-c0cb-4109-8588-7e23f70659e7	349_3	FALSE	38179	209	0.449	19	55	612.22	33672	0.88	56	608.25	34062	0.892166
AFVG_117M60	117	5ce2cc54-73e1-4d2a-ad93-13d32dc8454d	354_1	FALSE	48172	188	0.401	34	58	743.9	43146	0.9	56	778.554	43599	0.905069
AFVG_117M61	117	70df9774-22d2-4eca-af9e-f592df1c5bd9	366_2	FALSE	64874	3873	0.35	10	141	371.34	52359	0.81	129	418.884	54036	0.832938
AFVG_117M62	117	e669c3e1-6a1e-40c0-ae30-7726d5e0e29a	37_1	FALSE	87365	433	0.304	46	91	904.98	82353	0.94	83	1023.76	84972	0.972609
AFVG_117M63	117	d004ce75-1435-491b-ae16-15287ec047d8	380_1	FALSE	55413	341	0.333	16	83	597.51	49593	0.89	82	621.622	50973	0.919874
AFVG_117M64	117	0dc0556a-b4e2-4e0e-b227-7be1a460c6fd	390_1	TRUE	59707	2358	0.369	10	110	451.12	49623	0.83	106	483.34	51234	0.85809
AFVG_117M65	117	248b21c7-b156-4990-93dc-5b8090276349	39_6	FALSE	42761	111	0.4	110	45	898.33	40425	0.94	44	925.295	40713	0.952106
AFVG_117M66	117	cf689107-6911-4393-bff6-d8911b235731	410_5	FALSE	32260	185	0.426	18	59	478.22	28215	0.87	51	571.941	29169	0.904185
AFVG_117M67	117	dddbb1b3-281d-4701-ae5c-c297ac2de742	411_2	FALSE	36122	370	0.449	11	70	422.1	29547	0.82	70	425.143	29760	0.823875
AFVG_117M68	117	c78a9411-1468-476d-8c6b-110ca268622c	416_2	TRUE	29804	1141	0.329	15	57	439.74	25065	0.84	53	498.906	26442	0.887196
AFVG_117M69	117	9b0b602c-e750-4a6c-b74a-e2a09b0834e8	416_3	TRUE	29974	1307	0.329	34	64	432.8	27699	0.92	58	486.207	28200	0.940815
AFVG_117M70	117	42e9869a-dc0e-4a00-a432-b12be38007be	424_1	FALSE	38533	343	0.409	11	73	459.58	33549	0.87	58	616.448	35754	0.92788
AFVG_117M71	117	145a3ce4-cc9e-4f96-9c2d-0645d3eafd4a	430_1	FALSE	33044	172	0.409	19	52	564.46	29352	0.89	51	597.706	30483	0.922497
AFVG_117M72	117	8368da68-9003-43c4-88c6-438b8e110aa0	44_1	FALSE	86593	398	0.304	13	124	627.68	77832	0.9	82	1015.46	83268	0.961602
AFVG_117M73	117	0100f563-e6dd-40c5-b7c8-2edffd0fbc25	450_1	FALSE	38997	206	0.329	14	78	435.08	33936	0.87	61	610.623	37248	0.95515
AFVG_117M74	117	c564da7d-4916-4444-b013-0b1627ef3a49	45_1	FALSE	86430	380	0.307	25	88	942.38	82929	0.96	80	1049.55	83964	0.971468
AFVG_117M75	117	9b06abdb-46aa-4ba7-831b-776989f13254	49_1	FALSE	58981	272	0.358	16	136	339.2	46131	0.78	132	353.523	46665	0.791187
AFVG_117M76	117	a951a477-1d18-439d-9280-2e853e25e34e	51_1	FALSE	39599	203	0.337	34	61	595.43	36321	0.92	59	626.339	36954	0.933205
AFVG_117M77	117	cd01a8e6-2d75-4b96-80ce-27804fce1743	52_1	FALSE	37555	161	0.346	10	76	410.41	31191	0.83	77	410.104	31578	0.840847
AFVG_117M78	117	88963c19-fa49-4281-8891-b9e101ab4b02	56_1	FALSE	36594	161	0.352	23	53	624.51	33099	0.9	52	637.038	33126	0.90523
AFVG_117M79	117	bcd886e0-2bba-4c68-bfc7-96b7e2cf0caa	63_1	FALSE	38951	159	0.342	12	62	536.18	33243	0.85	59	582.153	34347	0.8818
AFVG_117M80	117	02c43e46-21a0-48b5-82a4-8861933ee006	64_1	FALSE	37190	409	0.466	20	67	441.81	29601	0.8	59	497.898	29376	0.78989
AFVG_117M81	117	60fc595d-6f7d-4bae-9661-0ac297fbb2a1	64_3	FALSE	37347	408	0.466	27	72	432.71	31155	0.83	63	487.714	30726	0.822717
AFVG_117M82	117	1d034b15-4873-4d69-8705-9438839e58f6	6_11	FALSE	38202	196	0.347	90	54	632.83	34173	0.89	52	657.865	34209	0.895477
AFVG_117M83	117	fd5f6773-2233-44b3-b360-f9d03ae23572	6_21	FALSE	38047	195	0.347	11	68	483.09	32850	0.86	67	492.672	33009	0.867585
AFVG_117M84	117	50659f76-bdfc-43e0-84ce-ee340251042b	6_23	FALSE	38478	197	0.347	24	55	621.6	34188	0.89	55	617.018	33936	0.881959
AFVG_117M85	117	543aa3ed-e307-47a7-858e-56d6d737a3ea	6_26	FALSE	38447	194	0.348	17	56	614.89	34434	0.89	56	614.893	34434	0.895623
AFVG_117M86	117	356736f0-0e28-4ba5-816b-fbac14c453ad	73_4	FALSE	38717	261	0.588	26	60	567.65	34059	0.88	57	608.737	34698	0.896195
AFVG_117M87	117	f77bc8b8-925d-4d0b-a1e1-f2e72bf64ff9	76_1	FALSE	47151	177	0.397	24	65	626.91	40749	0.86	64	677.297	43347	0.919323
AFVG_117M88	117	47279e0a-9391-494b-9143-c8a468f0a24d	84_1	FALSE	38849	160	0.334	12	96	328.44	31530	0.81	95	332.526	31590	0.813148
AFVG_117M89	117	a3410473-a932-48e6-a45d-15de32635785	85_1	FALSE	38849	160	0.333	42	67	507	33969	0.87	69	501.348	34593	0.890448
AFVG_117M90	117	47f1f555-3c53-4a02-977a-100433f6184e	86_1	FALSE	68282	2086	0.373	13	113	542.34	61284	0.9	100	631.83	63183	0.925324
AFVG_117M91	117	4e268f34-0b8f-435a-832a-1ae68dfa3a4b	88_1	FALSE	40480	151	0.394	33	45	848.27	38172	0.94	46	841.109	38691	0.955805
AFVG_117M92	117	ed281711-f53c-4663-a801-27ba6176fdb2	8_2	FALSE	34388	120	0.296	17	71	216.08	15342	0.45	66	336.818	22230	0.646446
AFVG_117M93	117	3eadf2fc-74eb-4577-af07-b809f6e132ab	94_1	FALSE	59788	1108	0.442	11	104	498.69	51864	0.87	79	700.747	55359	0.925922
AFVG_250M1	250	62e9775a-d3ca-4426-bf55-a8d8d3a5819e	0_10	FALSE	42580	166	0.447	34	53	772.47	40941	0.96	53	772.472	40941	0.961508
AFVG_250M2	250	54a31291-402f-40e9-8d71-8a9b4c1e7c29	0_2	FALSE	42572	161	0.446	62	56	724.23	40557	0.95	56	724.232	40557	0.952668
AFVG_250M3	250	e842a9cb-0461-4aee-8180-19f1585fb206	0_29	FALSE	42724	166	0.447	119	54	760.72	41079	0.96	53	775.528	41103	0.962059
AFVG_250M4	250	6c24b8e7-74a0-43de-9b30-0c66f0887e66	0_3	FALSE	42580	167	0.447	75	53	772.08	40920	0.96	53	772.075	40920	0.961015
AFVG_250M5	250	d6802403-e9c7-40be-8eab-10fa86c417ca	0_4	FALSE	42574	166	0.446	33	56	723.05	40491	0.95	56	723.054	40491	0.951073
AFVG_250M6	250	b944c0e9-da01-4c5b-9014-0daaf9ae5c4c	0_9	FALSE	42557	161	0.447	26	54	751.78	40596	0.95	53	767.717	40689	0.956106
AFVG_250M7	250	30371e12-5053-4dfd-a169-8bd0dd415f6d	1000_1	FALSE	42054	353	0.435	44	57	674.32	38436	0.91	52	742.154	38592	0.917677
AFVG_250M8	250	32eac70a-1f7e-4b59-83e2-0d8f1bed0f5c	1001_1	FALSE	40016	199	0.321	16	71	504.3	35805	0.89	68	549.838	37389	0.934351
AFVG_250M9	250	21007220-6bc9-4244-bd8c-4ceb04442f05	1002_5	FALSE	40606	205	0.323	34	73	509.75	37212	0.92	72	518.542	37335	0.919445
AFVG_250M10	250	034ea0d7-f00f-42e1-887a-c026417955ce	1002_6	FALSE	40621	205	0.323	157	70	542.19	37953	0.93	70	545.443	38181	0.939933
AFVG_250M11	250	aad5eb78-d34b-4827-8321-61ca1b139550	1003_2	FALSE	39155	144	0.526	20	51	682.18	34791	0.89	37	999	36963	0.944017
AFVG_250M12	250	f1b752dc-c543-4089-a4e1-19001858e6b2	1005_1	FALSE	52580	170	0.374	14	87	545.83	47487	0.9	65	779.262	50652	0.963332
AFVG_250M13	250	d0131181-105b-46b1-86d7-00d87b39cc2d	1009_1	FALSE	39593	265	0.455	45	57	646.42	36846	0.93	58	643.5	37323	0.942667
AFVG_250M14	250	5f67eb88-32d6-403f-b515-6c7b6d60f47e	1010_2	FALSE	44355	90	0.452	17	61	678.49	41388	0.93	58	727.966	42222	0.951911
AFVG_250M15	250	e013e23b-f50d-4adc-8e2e-3f8a6d5296f5	1014_1	FALSE	39512	197	0.443	19	68	559.99	38079	0.96	68	561.441	38178	0.966238
AFVG_250M16	250	446ef2d8-22a6-407d-a745-f70bb46a3229	1019_1	FALSE	46775	140	0.527	10	75	558.12	41859	0.89	68	639.044	43455	0.929022
AFVG_250M17	250	74ac1019-1499-4fc0-9718-d9b52f7feb9c	101_3	FALSE	40970	213	0.467	20	64	566.39	36249	0.88	61	596.803	36405	0.888577
AFVG_250M18	250	de72ef72-e8a7-478d-8e95-c6ba6f86c732	101_6	FALSE	40763	224	0.468	73	62	590.42	36606	0.9	60	612.6	36756	0.9017
AFVG_250M19	250	ddf25681-277d-48b4-8b09-1224c87c9bf2	1020_1	FALSE	66205	366	0.301	38	165	247.35	40812	0.62	83	751.229	62352	0.941802
AFVG_250M20	250	d67bd27f-fb4b-4e6f-9b26-0a32da1f65b2	1022_2	FALSE	49098	353	0.383	11	82	487.76	39996	0.81	77	529.13	40743	0.82983
AFVG_250M21	250	31b32cd2-0b5c-457b-98d3-3d1b3cae1dcd	1022_3	FALSE	49516	350	0.382	29	75	568.84	42663	0.86	67	653.866	43809	0.884744
AFVG_250M22	250	f2e0dec2-9b09-414b-a2ed-9cd8c3c4e8a8	1024_1	FALSE	33542	219	0.527	23	58	524.95	30447	0.91	56	545.196	30531	0.910232
AFVG_250M23	250	26638732-278f-451e-81eb-0d44f3dcf562	1026_1	FALSE	46675	270	0.571	63	67	593.01	39732	0.85	59	723.61	42693	0.914687
AFVG_250M24	250	3efc8093-59a9-4d83-a373-81d070330982	1027_2	FALSE	38124	111	0.473	48	44	763.5	33594	0.88	42	795.286	33402	0.876141
AFVG_250M25	250	a956ae53-3ac8-4a81-b1b0-4b1415e04264	1027_4	FALSE	38269	124	0.474	12	58	586.29	34005	0.89	59	587.644	34671	0.905981
AFVG_250M26	250	6c82a7e1-4182-4628-be25-cfafe947364c	1027_5	FALSE	38371	124	0.473	46	49	728.2	35682	0.93	46	775.565	35676	0.929765
AFVG_250M27	250	002d58a6-4426-4e1c-ac7f-496c782accff	1028_2	FALSE	40351	441	0.496	14	60	587.85	35271	0.87	55	659.945	36297	0.899532
AFVG_250M28	250	d45d95af-d689-48b5-897b-38e5ad105c68	102_1	FALSE	40912	219	0.469	26	58	630	36540	0.89	58	632.069	36660	0.89607
AFVG_250M29	250	688e49b2-6f78-46bc-afe3-f246ddbebe0b	1030_3	FALSE	29909	201	0.385	44	57	434.84	24786	0.83	47	575.553	27051	0.904443
AFVG_250M30	250	0648099b-919f-48bb-93b1-dc2ffdd6f5ba	1034_1	FALSE	44556	266	0.343	19	88	456.85	40203	0.9	80	519.075	41526	0.931996
AFVG_250M31	250	baf50b0c-19e4-4867-8238-e5dd23d4e567	1035_1	FALSE	44197	257	0.345	31	80	507	40560	0.92	76	550.895	41868	0.947304
AFVG_250M32	250	25477d17-564f-4a65-bd1d-a0b4ea2b2393	1036_1	FALSE	35370	359	0.454	11	66	323.91	21378	0.6	60	463.1	27786	0.785581
AFVG_250M33	250	ad05c30c-00e6-4b39-966b-aaf06382df08	1037_1	FALSE	38270	209	0.378	18	80	375.23	30018	0.78	45	794.4	35748	0.9341
AFVG_250M34	250	0fb0ba5c-bd2a-4ef9-8dc6-d31605536d38	1039_1	FALSE	39279	154	0.441	22	67	566.28	37941	0.97	63	604.667	38094	0.969831
AFVG_250M35	250	16bf2652-7d61-4011-8407-4e0bd853b254	103_3	FALSE	40705	220	0.423	27	61	618.64	37737	0.93	61	621.836	37932	0.931876
AFVG_250M36	250	e4d60aa9-7474-4d67-8e8b-ce2cdcb0124a	103_4	FALSE	40939	210	0.423	49	57	669.37	38154	0.93	58	664.448	38538	0.941352
AFVG_250M37	250	0c0fade2-d749-4ddc-904a-6579f123861f	1046_1	FALSE	36008	215	0.348	11	79	362.62	28647	0.8	53	643.245	34092	0.94679
AFVG_250M38	250	3078737a-d623-4342-bfcf-0fd038b4ea1d	1047_3	FALSE	53043	421	0.378	22	67	737.96	49443	0.93	61	816.738	49821	0.939257
AFVG_250M39	250	3ebe8367-471d-4f94-a98c-37752ab0a016	104_1	FALSE	38853	116	0.457	86	55	662.13	36417	0.94	48	759.438	36453	0.938229
AFVG_250M40	250	d05943ab-c599-4571-9d08-dfdcc2df1c53	1050_2	FALSE	36329	242	0.44	44	53	640.75	33960	0.93	54	632.722	34167	0.940488
AFVG_250M41	250	ef9cbf30-e052-4ef6-be60-57d4a890c322	1051_1	FALSE	40025	276	0.439	18	61	576.3	35154	0.88	60	599.95	35997	0.899363
AFVG_250M42	250	078d5395-0935-4c31-92d2-d90848f320b8	1052_1	FALSE	40470	281	0.44	71	52	710.25	36933	0.91	51	732.235	37344	0.922758
AFVG_250M43	250	5a82f68e-8291-4345-abeb-eedaad5e0e13	1052_2	FALSE	39773	282	0.44	48	55	652.47	35886	0.9	54	671.222	36246	0.911322
AFVG_250M44	250	f7070a0b-f461-44cb-aa9b-5ea406fa73ce	1054_1	FALSE	59821	1132	0.442	21	89	616.18	54840	0.92	76	739.105	56172	0.939001
AFVG_250M45	250	a6d55fd3-f5fb-42b5-b4ca-4fa6a92193dd	1055_2	FALSE	56200	1591	0.332	13	90	557.07	50136	0.89	68	778.809	52959	0.942331
AFVG_250M46	250	a7027def-9d1e-486d-9f16-4bb82c556a76	1058_2	FALSE	39046	494	0.498	13	61	593.07	36177	0.93	56	648.696	36327	0.930364
AFVG_250M47	250	f8073127-cc7c-437f-9d4a-129ba2289b48	1058_3	FALSE	38953	493	0.495	22	60	598.45	35907	0.92	58	633.31	36732	0.942983
AFVG_250M48	250	5b4f13f9-b284-4243-8bd2-31f5fff3f5a7	105_1	FALSE	45807	291	0.468	15	71	594.13	42183	0.92	68	649.147	44142	0.963652
AFVG_250M49	250	06943003-2b07-4daf-9b91-c61fd25dbf1c	1063_1	FALSE	36529	242	0.444	11	70	413.23	28926	0.79	62	529.742	32844	0.899121
AFVG_250M50	250	0714480c-a4bd-4809-ae3a-62696fb501f3	1064_1	FALSE	37767	379	0.583	25	84	391.29	32868	0.87	67	531.269	35595	0.942489
AFVG_250M51	250	645d9c9a-740d-41be-97c9-d5d81b8572ee	1066_5	FALSE	38218	231	0.455	22	57	611.47	34854	0.91	51	703.588	35883	0.938903
AFVG_250M52	250	c92671b8-7b26-4e08-a729-6ccb22d925a6	1067_2	FALSE	39118	259	0.445	13	69	459.65	31716	0.81	66	487.227	32157	0.822051
AFVG_250M53	250	56cfec16-7818-48dd-83b9-c9ed85955a0e	1068_3	FALSE	39316	271	0.439	24	68	499.46	33963	0.86	66	520.045	34323	0.873003
AFVG_250M54	250	ff03ad22-57dc-4f58-8700-777171bf95be	1068_4	FALSE	39056	273	0.44	96	62	558.73	34641	0.89	62	563.371	34929	0.894331
AFVG_250M55	250	8a2e0e65-62da-447b-b4b5-04bbd5963ada	1068_5	FALSE	39265	273	0.44	17	66	505.55	33366	0.85	64	527.109	33735	0.859162
AFVG_250M56	250	2338fe5b-3d50-40e2-9b1f-b3a4f0a6dee4	106_1	FALSE	40130	128	0.485	96	59	652.37	38490	0.96	55	706.8	38874	0.968702
AFVG_250M57	250	aaa1bf42-653d-4baa-a52d-6f7b9dada843	1071_3	FALSE	37341	231	0.551	30	49	682.84	33459	0.9	43	803.791	34563	0.925605
AFVG_250M58	250	baaa2c29-fcec-44d4-a4e4-66076a3c3463	1072_2	FALSE	35328	518	0.542	39	52	549.23	28560	0.81	45	683.867	30774	0.871094
AFVG_250M59	250	bd5daa5a-7e58-4ceb-84bc-c99406c48395	1072_4	FALSE	35586	525	0.542	20	59	483.51	28527	0.8	51	591.824	30183	0.848171
AFVG_250M60	250	df90ee30-9552-4a10-b0f1-9ad2f8751efb	1074_3	FALSE	39950	173	0.444	58	65	587.95	38217	0.96	63	616.952	38868	0.972916
AFVG_250M61	250	44e49c9d-fd73-4ce1-bf26-8c28f53b1f05	1076_1	FALSE	35784	261	0.533	27	55	583.75	32106	0.9	49	655.959	32142	0.898223
AFVG_250M62	250	322c0769-bb9d-48a3-a7c9-da86c69f9084	107_10	TRUE	35745	1531	0.322	11	89	323.76	28815	0.81	89	338.191	30099	0.842048
AFVG_250M63	250	cf199f52-e75e-4008-bfb3-729d5fd60ec2	107_11	TRUE	35837	1607	0.322	50	77	430.99	33186	0.93	76	437.684	33264	0.928203
AFVG_250M64	250	2094952b-bbd7-4426-aab5-6fccbb216e93	107_12	TRUE	35927	1698	0.321	26	80	405.26	32421	0.9	80	408.488	32679	0.909594
AFVG_250M65	250	db5869ee-ea13-4942-a0b1-42c604a8a751	107_13	TRUE	35669	1414	0.321	45	77	427.29	32901	0.92	76	437.763	33270	0.932743
AFVG_250M66	250	f971653d-ee4a-4daf-b102-b7e8145eb09a	107_5	TRUE	36010	1796	0.322	10	91	326.27	29691	0.82	92	330.359	30393	0.844016
AFVG_250M67	250	f108abd8-f632-4223-bc88-20b0f45e8761	107_7	TRUE	36094	1893	0.321	13	83	375.9	31200	0.86	83	379.771	31521	0.873303
AFVG_250M68	250	887c8ca5-50ba-47ac-a3b3-3484fd54f0ba	107_8	TRUE	36142	1899	0.322	15	72	423.42	30486	0.84	71	430.606	30573	0.845913
AFVG_250M69	250	21802df7-24b6-4e95-b46e-e00f99e54074	107_9	TRUE	35891	1646	0.321	23	78	401.46	31314	0.87	77	407.377	31368	0.87398
AFVG_250M70	250	11cf7bea-13e3-4300-beaf-d910c489c4b5	1081_1	FALSE	45541	239	0.564	14	74	506.68	37494	0.82	67	616.701	41319	0.907292
AFVG_250M71	250	11204b81-6a41-4242-8801-e6b3bbeded98	1082_1	FALSE	44626	154	0.499	12	65	646.57	42027	0.94	55	762.927	41961	0.940281
AFVG_250M72	250	5acc8836-1075-48e4-8760-5cf8871c4221	1083_1	FALSE	38397	315	0.412	10	64	465.84	29814	0.78	58	567.672	32925	0.857489
AFVG_250M73	250	42b4ba68-6017-41ac-b808-91af41f44dd0	1084_1	FALSE	38877	321	0.415	69	55	632.73	34800	0.89	54	668.222	36084	0.928158
AFVG_250M74	250	03183368-3c2a-41d8-9510-d184eae07d90	1086_2	FALSE	35676	469	0.395	28	50	622.5	31125	0.87	47	669.383	31461	0.881853
AFVG_250M75	250	6e14c27e-0160-4d19-af7d-065d24d3b36d	1086_5	FALSE	35889	470	0.394	25	55	574.42	31593	0.88	51	627.765	32016	0.892084
AFVG_250M76	250	8ec5a12b-f86a-4f8f-9791-906bd40ff0c6	1087_4	FALSE	44146	295	0.513	29	62	669.34	41499	0.94	57	743.895	42402	0.960495
AFVG_250M77	250	61e4061f-e5f1-42d4-8295-37342f876b2d	1088_1	FALSE	36159	234	0.326	21	63	527.67	33243	0.92	60	568.15	34089	0.942753
AFVG_250M78	250	2f063605-321e-4f3e-886e-e3f2057fb89e	108_3	FALSE	38747	186	0.441	55	57	651.26	37122	0.96	55	676.036	37182	0.95961
AFVG_250M79	250	f0d6635d-f217-4e7f-a162-7732de5cb8b8	108_4	FALSE	38871	185	0.442	39	59	621.56	36672	0.94	57	643.158	36660	0.94312
AFVG_250M80	250	48d0e8ac-cbb8-49e4-bb6f-0dce01dab56d	1095_3	FALSE	37211	423	0.604	42	61	536.07	32700	0.88	50	701.58	35079	0.942705
AFVG_250M81	250	98ec9228-da1d-4f9e-89d7-eca3b04cf61c	1096_1	FALSE	39667	77	0.391	16	59	601.12	35466	0.89	48	761.625	36558	0.921623
AFVG_250M82	250	ee1378da-1986-4790-813b-dcc0c154da2b	1097_1	FALSE	41964	427	0.453	17	65	553.57	35982	0.86	55	677.509	37263	0.887975
AFVG_250M83	250	74cc4b07-5018-4811-ac7a-5a9964ebf107	1098_2	FALSE	33589	193	0.309	29	61	468.69	28590	0.85	57	517.947	29523	0.878948
AFVG_250M84	250	a06967a0-0e03-4978-bde0-4cf8a88d6725	109_1	FALSE	42966	292	0.422	17	71	554.66	39381	0.92	66	601.773	39717	0.924382
AFVG_250M85	250	6d2d1aa6-3ffc-4fb2-94a7-bd76a72bdd6a	10_1	FALSE	41739	113	0.445	74	57	705.42	40209	0.96	57	705.421	40209	0.963344
AFVG_250M86	250	51a7f240-2f12-497d-96bb-5830a9a32afd	1101_1	FALSE	48987	90	0.515	16	77	571.29	43989	0.9	58	795.724	46152	0.942128
AFVG_250M87	250	a23f6678-2da9-471e-b45b-5d80d2dd1ec1	110_1	TRUE	32171	1728	0.624	13	68	417.62	28398	0.88	67	424.119	28416	0.88328
AFVG_250M88	250	1659f491-5f48-464c-a4c9-cf3affd02e18	110_2	TRUE	32238	1768	0.624	29	57	513.95	29295	0.91	58	518.793	30090	0.933371
AFVG_250M89	250	ce24a6ea-bdf6-4d0a-84a6-b2e3bc575bb7	110_3	TRUE	32600	2139	0.625	26	54	547.33	29556	0.91	53	561.566	29763	0.912975
AFVG_250M90	250	bee6aac2-062a-49d5-a3b8-480fc159fefa	110_4	TRUE	32249	1776	0.624	22	53	549.17	29106	0.9	53	549.057	29100	0.902354
AFVG_250M91	250	06a283e1-2f4c-4560-a426-86e6be34f04f	110_6	TRUE	32364	1898	0.625	18	55	511.8	28149	0.87	56	502.821	28158	0.870041
AFVG_250M92	250	84a5436b-6260-4900-aacd-324638209d8a	1110_1	FALSE	37940	330	0.375	32	59	555.51	32775	0.86	54	629.722	34005	0.896284
AFVG_250M93	250	ddddfa35-4674-43a3-bf83-ae79ed66cebe	1115_2	FALSE	42816	184	0.448	35	56	699.54	39174	0.91	58	688.966	39960	0.933296
AFVG_250M94	250	416fb402-c39d-4098-b3d8-7680efca4c0a	1117_3	TRUE	33180	1752	0.606	28	55	565.31	31092	0.94	51	629.118	32085	0.966998
AFVG_250M95	250	14d40a32-365a-42c1-bb97-821def18c96f	1120_10	FALSE	38281	333	0.46	44	52	642.12	33390	0.87	52	642.115	33390	0.872234
AFVG_250M96	250	62e3199a-71ca-43ab-a045-5daa01f3b8c1	1120_11	FALSE	38276	332	0.46	96	51	679	34629	0.9	50	694.56	34728	0.907305
AFVG_250M97	250	a8383355-b22a-4e4f-810c-a11475971643	1120_13	FALSE	38293	346	0.46	88	50	693.3	34665	0.9	49	704.694	34530	0.901731
AFVG_250M98	250	77a6e60e-fc23-4553-82bf-3f10188f2156	1120_15	FALSE	38281	346	0.46	12	55	580.91	31950	0.83	58	579.362	33603	0.877798
AFVG_250M99	250	882ad148-9675-4b0c-940d-e31f73587217	1121_3	FALSE	44455	415	0.411	17	66	586.73	38724	0.87	58	713.483	41382	0.930874
AFVG_250M100	250	a29bd96f-eec3-42b6-9abe-44d8a736ee30	1122_1	FALSE	45004	309	0.478	10	87	424.93	36969	0.82	73	564.863	41235	0.916252
AFVG_250M101	250	93b6e911-902b-489e-80b2-4c6288496202	1132_2	FALSE	42443	171	0.447	28	59	679.68	40101	0.94	58	692.017	40137	0.945668
AFVG_250M102	250	8c391d2b-0ba4-4a99-9793-12ca11e4abe8	1133_1	FALSE	42652	175	0.444	18	66	593.05	39141	0.92	65	608.446	39549	0.927248
AFVG_250M103	250	f9c1e4d9-7b63-41f7-a216-e2795297f5cf	1133_2	FALSE	42552	175	0.445	24	67	588	39396	0.92	65	609.323	39606	0.930767
AFVG_250M104	250	75256d85-0ed0-49e3-bdef-4e75567217c6	1138_1	FALSE	35918	230	0.632	51	64	503.48	32223	0.9	50	679.14	33957	0.945403
AFVG_250M105	250	e16eeb9f-45f5-4adc-ba62-af4b11dd3914	1139_2	FALSE	47382	346	0.468	14	80	538.88	43110	0.91	67	659.149	44163	0.932063
AFVG_250M106	250	bc52b884-99bb-46a4-b4de-8f47afd11b2e	113_1	FALSE	44171	90	0.453	39	55	735.65	40461	0.92	54	767.833	41463	0.938693
AFVG_250M107	250	ea1f055e-6182-4833-a0f2-6f8648456b80	1140_1	FALSE	40150	304	0.399	13	60	582.65	34959	0.87	55	658.091	36195	0.901494
AFVG_250M108	250	74d9543e-78f2-48a9-8b70-97d60f7df576	1141_1	FALSE	41065	261	0.434	17	67	561.4	37614	0.91	66	568.955	37551	0.914428
AFVG_250M109	250	dde523fc-9f4f-461c-a111-4947982be887	1141_2	FALSE	41241	259	0.434	37	66	592.68	39117	0.95	66	592.227	39087	0.94777
AFVG_250M110	250	3ac419ff-6c26-48a7-a07f-0b51c3a79b2d	1142_3	FALSE	38463	260	0.507	16	63	509.14	32076	0.83	59	563.746	33261	0.864753
AFVG_250M111	250	9976a8ec-7ce6-41fe-a83f-616dbad83963	1143_3	FALSE	37940	274	0.481	27	55	566.13	31137	0.82	52	602.019	31305	0.825119
AFVG_250M112	250	b85457f9-a911-41ce-b601-0948c508cbb7	1143_4	FALSE	38069	266	0.482	55	55	567.55	31215	0.82	52	601.327	31269	0.821377
AFVG_250M113	250	c9e48aad-185c-4b48-9efb-f793145a46fc	1144_1	FALSE	36758	231	0.514	25	66	420.05	27723	0.75	54	627.944	33909	0.922493
AFVG_250M114	250	0c3bfecb-96a3-40a8-9518-f527c1923e45	1145_3	FALSE	32449	178	0.365	32	48	572.5	27480	0.85	49	588	28812	0.887916
AFVG_250M115	250	2d7917cb-eb17-450c-b3a3-b1f3199acbf3	1148_2	FALSE	41340	197	0.329	20	72	512.04	36867	0.89	61	636.59	38832	0.939332
AFVG_250M116	250	7f774b91-b56b-48de-b5a9-5804f230f68c	114_3	FALSE	39974	274	0.438	54	60	598.2	35892	0.9	56	643.607	36042	0.901636
AFVG_250M117	250	f3a15cc0-f01b-4376-a613-6f23cc977559	1150_1	FALSE	40416	180	0.447	17	69	538.96	37188	0.92	61	623.705	38046	0.94136
AFVG_250M118	250	31987486-a411-4dc5-abbf-f6d6600ad194	1151_3	FALSE	37655	229	0.321	14	69	474.78	32760	0.87	62	560.565	34755	0.922985
AFVG_250M119	250	b7674f80-37ea-4825-b6ea-c8113facbb5a	1153_4	FALSE	35505	263	0.535	93	52	598.9	31143	0.88	48	668.062	32067	0.903169
AFVG_250M120	250	d21097e9-c1f9-48a5-b476-5c96cc0c0614	1154_1	FALSE	38913	299	0.382	34	51	665.59	33945	0.87	49	725.755	35562	0.913885
AFVG_250M121	250	a4ff7d91-6c92-4690-9db8-df5cb636a228	1155_1	FALSE	65148	787	0.452	10	86	656.44	56454	0.87	66	914.364	60348	0.926322
AFVG_250M122	250	b2ce45ba-0598-4b0d-aeca-96801a0d2eeb	115_13	FALSE	40772	405	0.328	121	80	479.62	38370	0.94	79	486.722	38451	0.943074
AFVG_250M123	250	1fa91b0d-66f8-4a23-bc88-6876ec0f7c3a	1165_1	FALSE	42222	135	0.458	17	63	621.48	39153	0.93	60	662.35	39741	0.941239
AFVG_250M124	250	9503b072-2ee1-47b0-a953-8047311eb2c7	1166_2	FALSE	46685	865	0.401	15	67	639.04	42816	0.92	64	677.672	43371	0.929014
AFVG_250M125	250	f6fde013-82e2-4c91-b9d6-2618e7baceed	1167_3	FALSE	47481	1073	0.405	46	59	759.56	44814	0.94	58	779.276	45198	0.951918
AFVG_250M126	250	daace202-2aa8-43c9-86c4-5d78482abfcd	116_1	FALSE	33134	325	0.547	19	48	640.75	30756	0.93	47	656.872	30873	0.931762
AFVG_250M127	250	b6a4eeba-7ebd-42eb-af4c-193de24c70d9	1170_1	FALSE	34741	276	0.534	93	51	603.24	30765	0.88	51	613.471	31287	0.900579
AFVG_250M128	250	366d58c8-aea8-4781-889f-5ee02ba76294	1173_2	FALSE	39361	419	0.398	22	73	429.62	31362	0.8	53	672	35616	0.904855
AFVG_250M129	250	ec079475-2483-4a2e-9fd0-88c5a96a56d9	1175_1	FALSE	41734	148	0.43	19	71	552.21	39207	0.94	65	620.215	40314	0.965975
AFVG_250M130	250	e5b95a8a-014d-4924-b023-29a8090d97be	1176_1	FALSE	61181	165	0.324	17	104	549.89	57189	0.93	94	618.479	58137	0.950246
AFVG_250M131	250	f847f98b-3087-4292-8239-b1ace20cf3a2	1179_1	FALSE	34254	428	0.535	13	60	434.3	26058	0.76	50	592.62	29631	0.865038
AFVG_250M132	250	54e67375-7227-40e9-b275-3d09b6ca6f28	117_1	FALSE	44457	845	0.395	69	57	726.21	41394	0.93	57	736.526	41982	0.944328
AFVG_250M133	250	0321bb1e-6030-4e27-830d-1b650c879d6d	1186_3	TRUE	36704	1718	0.388	17	59	564.86	33327	0.91	46	715.435	32910	0.896633
AFVG_250M134	250	c51ab6f9-39e1-4de1-8ce6-02559c991883	1188_1	FALSE	57494	569	0.556	10	94	531.83	49992	0.87	67	806.194	54015	0.939489
AFVG_250M135	250	4adbeb87-244d-4790-846c-c37d78150d15	1189_1	FALSE	38492	249	0.432	41	58	580.71	33681	0.87	57	602.368	34335	0.892004
AFVG_250M136	250	82ff57e2-218d-4a2a-91e7-1cafb17db07b	1189_2	FALSE	38490	245	0.432	59	53	638.6	33846	0.88	51	669.471	34143	0.887062
AFVG_250M137	250	69e1b580-1b86-485a-bb9d-f0b8d045d13e	118_1	FALSE	46272	315	0.369	24	63	694.9	43779	0.95	59	749.746	44235	0.955978
AFVG_250M138	250	5d10e14d-0ff7-4969-b0dd-4ca1017c9140	1193_1	FALSE	63013	433	0.389	13	90	636.07	57246	0.91	81	740.556	59985	0.951946
AFVG_250M139	250	e06881a7-65d0-4f3c-986f-b57089e9ba21	1196_1	FALSE	39831	446	0.456	22	57	612.58	34917	0.88	49	739.592	36240	0.909844
AFVG_250M140	250	f9189a6d-2f5e-4270-8b08-ce8dda754f63	1197_5	TRUE	29098	1421	0.499	22	55	491.24	27018	0.93	53	512.377	27156	0.93326
AFVG_250M141	250	a8c9e4b8-7454-4008-b88c-41ec311cca7f	1197_6	TRUE	29099	1425	0.499	42	47	566.74	26637	0.92	46	590.87	27180	0.934053
AFVG_250M142	250	0e2dc1bb-84ed-4f3d-a03f-fbdbd8752f0e	1197_7	TRUE	28844	1172	0.498	41	52	514.62	26760	0.93	51	530.706	27066	0.938358
AFVG_250M143	250	601166b1-5b06-479e-990c-5e5dcfbbccbd	1198_10	TRUE	39831	2801	0.391	46	48	736.88	35370	0.89	49	727.469	35646	0.894931
AFVG_250M144	250	eeb4537d-e2c6-436c-ada7-475927a7448b	1198_6	TRUE	39136	2127	0.39	24	60	574.75	34485	0.88	60	577.85	34671	0.885911
AFVG_250M145	250	e25acf95-e3d2-4e52-bd6a-5222e8c515f2	1198_7	TRUE	39329	2316	0.393	31	56	637.82	35718	0.91	55	649.745	35736	0.908642
AFVG_250M146	250	cd37eefc-8544-4a0e-b63b-96f1de97bd52	1198_9	TRUE	38619	1607	0.392	38	52	670.21	34851	0.9	52	671.712	34929	0.904451
AFVG_250M147	250	35921425-0ed1-44b5-91fc-5da9be5f9286	119_1	FALSE	42213	164	0.447	51	67	601.12	40275	0.95	66	619.818	40908	0.969085
AFVG_250M148	250	9c33e945-ba4c-4f61-91c0-e59b2dcadf2b	11_1	FALSE	41452	113	0.446	22	60	665.15	39909	0.96	60	665.15	39909	0.962776
AFVG_250M149	250	6b8deb68-7b68-4894-bf83-188da53c91fe	11_2	FALSE	41557	108	0.446	25	57	698.79	39831	0.96	57	698.789	39831	0.958467
AFVG_250M150	250	cdbe55de-efd4-4c8b-8c79-f54a31907426	11_3	FALSE	41560	106	0.446	11	69	570.3	39351	0.95	68	585.706	39828	0.958325
AFVG_250M151	250	eb1e8235-1e21-41a8-896b-ea275efdf83e	1200_2	FALSE	38851	321	0.589	59	55	614.18	33780	0.87	55	649.364	35715	0.919281
AFVG_250M152	250	cf43f06b-b114-4ac6-b24e-28339e69ee98	1201_1	FALSE	40777	405	0.463	40	61	599.8	36588	0.9	54	700.667	37836	0.927876
AFVG_250M153	250	6d1c3ac0-3bbc-4234-a268-24ff21cee2a9	1207_2	FALSE	43120	274	0.455	22	70	528.73	37011	0.86	56	707.464	39618	0.918785
AFVG_250M154	250	d4fb9f7e-e418-4689-8b11-66e387c01df6	1208_1	FALSE	37833	194	0.435	14	55	622.53	34239	0.9	52	664.269	34542	0.913012
AFVG_250M155	250	426b8ea1-ab13-4564-b880-df627a7df2c6	1208_3	FALSE	37091	185	0.437	11	55	620.45	34125	0.92	55	626.073	34434	0.928365
AFVG_250M156	250	3753e5a3-7c3d-44e9-996d-7215757b1211	1209_2	FALSE	41747	361	0.455	20	56	673.98	37743	0.9	54	709.778	38328	0.918102
AFVG_250M157	250	08aa40e9-d389-4797-badb-191b77d0220f	1214_1	FALSE	40605	474	0.387	25	48	801.56	38475	0.95	44	879.614	38703	0.953158
AFVG_250M158	250	b2e7c7cb-f246-4c17-b6e0-eb4eeaf1126e	1216_1	FALSE	36486	345	0.504	41	57	592.63	33780	0.92	54	642.611	34701	0.951077
AFVG_250M159	250	ff007904-5363-4ee2-a224-1d859425c382	1217_1	FALSE	44165	128	0.46	33	57	710.32	40488	0.92	48	850.812	40839	0.924691
AFVG_250M160	250	349de696-52e6-465b-b7c3-fee49e76a6ce	1219_1	FALSE	33066	417	0.561	33	50	568.32	28416	0.86	51	566.118	28872	0.873163
AFVG_250M161	250	46b829e7-5827-4678-9a66-ce2be5063dc2	1219_2	FALSE	33403	443	0.562	28	54	538	29052	0.87	55	555.818	30570	0.915187
AFVG_250M162	250	43baa077-f527-49f0-813e-922d3f067423	1219_3	FALSE	33045	423	0.561	46	51	577.53	29454	0.89	52	579.577	30138	0.912029
AFVG_250M163	250	b2d06e71-bb3b-4b92-bec7-bdf63192051f	1219_5	TRUE	33253	431	0.561	25	53	541.75	28713	0.86	55	530.236	29163	0.877004
AFVG_250M164	250	91a80d1f-7caf-449a-b7b1-e5c3f2306abc	121_1	FALSE	42087	164	0.45	28	59	686.64	40512	0.96	58	698.483	40512	0.962578
AFVG_250M165	250	d8d8d98f-d9f8-4350-9f09-b22743adc619	1220_2	FALSE	39183	442	0.463	25	68	471.22	32043	0.82	58	608.276	35280	0.90039
AFVG_250M166	250	cba892dd-156a-43d5-8f83-8e847683e746	1222_1	FALSE	61031	221	0.391	29	88	649.57	57162	0.94	82	702.037	57567	0.943242
AFVG_250M167	250	d87daa5e-03f9-4064-9f1d-8c1877059c80	1223_1	FALSE	33985	238	0.483	13	51	581.59	29661	0.87	49	633.367	31035	0.913197
AFVG_250M168	250	5ad03060-8122-4fae-86c4-0c7000acc8bc	1227_1	FALSE	38118	302	0.5	45	54	638.5	34479	0.9	47	752.362	35361	0.927672
AFVG_250M169	250	aa7ddbf1-5018-4a98-a2b4-c134d4ad46d2	1232_4	FALSE	53600	193	0.344	37	68	730.1	49647	0.93	68	739.456	50283	0.938116
AFVG_250M170	250	0356ea96-f59e-4293-9284-ce2d63f9bc5a	1232_5	FALSE	53850	192	0.345	29	70	713.31	49932	0.93	70	721.414	50499	0.937772
AFVG_250M171	250	a12e5f76-ce32-4d9e-a6a9-47aa4c904e00	1232_6	FALSE	54105	193	0.345	69	70	727.76	50943	0.94	68	748.235	50880	0.940394
AFVG_250M172	250	02015df1-76b3-4364-a299-1daa23aa545d	1236_1	FALSE	46914	2741	0.498	10	76	482.57	36675	0.78	68	583.015	39645	0.845057
AFVG_250M173	250	af92f1ee-7bde-4962-bbb8-1c29e1f67ddd	1238_3	FALSE	57147	931	0.35	47	84	618.68	51969	0.91	84	636.571	53472	0.935692
AFVG_250M174	250	053bbfe5-31cc-4d72-a3f7-f7b83f71039a	1240_10	FALSE	38009	213	0.374	57	62	525.73	32595	0.86	53	660.283	34995	0.920703
AFVG_250M175	250	f089191f-72e9-4fee-8133-b8a05841e9a8	1240_5	FALSE	38263	212	0.373	19	76	425.25	32319	0.84	66	508.273	33546	0.876722
AFVG_250M176	250	3ece0080-3b24-4d80-9666-28ffaaefbb23	1241_1	FALSE	39673	157	0.355	23	62	565.79	35079	0.88	54	683	36882	0.92965
AFVG_250M177	250	938414c8-db1e-43dd-b6c5-a0b17bda104e	1242_2	FALSE	37869	128	0.37	42	57	627.32	35757	0.94	54	664.167	35865	0.947081
AFVG_250M178	250	65bb8402-55ae-42aa-80f4-c9f0541e1f6d	1243_2	FALSE	39162	483	0.458	17	70	450.39	31527	0.8	62	522.194	32376	0.82672
AFVG_250M179	250	e13a7e47-e2d7-41c2-a6ba-8678c3bac2f5	1246_2	FALSE	40814	120	0.435	32	60	654.75	39285	0.96	54	732.167	39537	0.968712
AFVG_250M180	250	0f4fec3e-8b2f-46dd-a909-ac99a5deafb1	1247_2	FALSE	35643	406	0.529	31	53	629.55	33366	0.94	47	728.17	34224	0.960189
AFVG_250M181	250	4963b292-1112-4fb0-86d8-5070b050fc27	1248_7	FALSE	43239	217	0.373	122	50	814.2	40710	0.94	47	870.128	40896	0.945813
AFVG_250M182	250	f5715ab0-794d-4383-8330-06fe2799bb5c	1252_1	FALSE	37241	346	0.36	24	72	479.54	34527	0.93	64	538.781	34482	0.925915
AFVG_250M183	250	eefd9dfe-8b55-42f8-bf02-03d102031a56	1253_1	FALSE	40932	1494	0.499	21	58	617.33	35805	0.87	52	686.769	35712	0.872471
AFVG_250M184	250	e49447de-83f7-477c-8046-4c18807f3ac4	1256_2	FALSE	35836	360	0.569	79	52	646.04	33594	0.94	51	662.235	33774	0.94246
AFVG_250M185	250	67e24b00-b05c-4ce0-9ba3-7c46e17a39be	1263_2	FALSE	62997	1883	0.415	13	105	533.89	56058	0.89	84	695.107	58389	0.926854
AFVG_250M186	250	af8b65ce-2d49-4983-a0a7-34ff3df6af09	1268_1	FALSE	41490	120	0.458	13	72	504.54	36327	0.87	71	519	36849	0.888142
AFVG_250M187	250	a47a6a9d-7911-4bac-94ae-209e81ad3e19	1270_2	FALSE	40084	219	0.449	34	79	465.87	36804	0.92	71	524.535	37242	0.929099
AFVG_250M188	250	07fd1a16-80d6-4def-933b-0c2a04a7398f	1272_2	TRUE	39152	1799	0.527	29	60	556.75	33405	0.85	57	622.789	35499	0.906697
AFVG_250M189	250	38aaa733-1baf-49c1-9b87-73bd15b89896	1274_1	FALSE	39184	234	0.336	25	67	527.82	35364	0.9	59	629.797	37158	0.948295
AFVG_250M190	250	c2f90d6a-2137-46f6-aeb5-6390e69af4b9	1275_4	FALSE	33477	221	0.531	56	54	575.33	31068	0.93	55	567.164	31194	0.931804
AFVG_250M191	250	b7b3e68a-85ab-4e0f-8221-e0f7d5793315	1279_6	FALSE	32712	215	0.529	65	53	583.53	30927	0.94	53	585	31005	0.947817
AFVG_250M192	250	451bf8f2-b954-42fe-a2b0-c1240801f87c	127_1	FALSE	44609	191	0.436	55	50	843.66	42183	0.95	43	986.372	42414	0.950795
AFVG_250M193	250	edae43b7-e8e1-4f3a-b178-9eb962a2d81e	1286_2	FALSE	39198	1190	0.452	22	68	503.78	34257	0.87	55	654.164	35979	0.917878
AFVG_250M194	250	ab220e9d-e0d2-4755-8dd1-7a2d22fbbd6f	1288_1	FALSE	38269	338	0.516	13	83	368.57	30591	0.8	70	474.686	33228	0.868275
AFVG_250M195	250	b645ae78-eb95-4eb1-8b7e-bbd28aa68280	128_1	FALSE	42153	80	0.437	65	55	745.2	40986	0.97	54	758.944	40983	0.972244
AFVG_250M196	250	e731dcae-8eca-4c72-8f90-f62cf38030c6	1290_3	FALSE	33427	218	0.57	12	52	530.02	27561	0.82	51	545.176	27804	0.831783
AFVG_250M197	250	8b3c3e5a-8476-4fb9-ac96-dfd5094faa8e	1290_4	FALSE	33157	223	0.57	19	55	539.62	29679	0.89	50	592.98	29649	0.8942
AFVG_250M198	250	368db8fd-4403-4ac0-9205-218b35778710	1291_2	FALSE	44189	295	0.541	45	54	772.17	41697	0.94	46	916.174	42144	0.953722
AFVG_250M199	250	4b32caad-005e-46f1-b5cd-1930c8cfb192	1295_1	FALSE	39158	199	0.406	24	70	498.69	34908	0.89	67	525.224	35190	0.898667
AFVG_250M200	250	cffc25db-f973-45b0-89cd-7b50fcf7d95f	1295_2	FALSE	39402	187	0.406	22	75	461.36	34602	0.88	71	493.183	35016	0.888686
AFVG_250M201	250	ef50f77a-82b1-46aa-8580-7aec58c36a18	1296_1	FALSE	40425	275	0.412	10	84	405.75	34083	0.84	60	610.45	36627	0.906048
AFVG_250M202	250	3a6f04b7-2e04-4633-9095-c69e0267e65e	1297_2	FALSE	37288	170	0.516	83	57	561.42	32001	0.86	51	657.353	33525	0.899083
AFVG_250M203	250	5c1e3a6b-4776-450b-9134-de5970af3196	1298_1	FALSE	41896	289	0.328	38	84	458.82	38541	0.92	85	466.729	39672	0.946916
AFVG_250M204	250	a9d97a89-43f3-4da5-9cee-a191cf66365a	1299_1	FALSE	43732	309	0.333	15	91	424.12	38595	0.88	78	527.692	41160	0.941187
AFVG_250M205	250	47ff2dbd-d353-4a8c-bb80-dabf5121c330	129_1	TRUE	40306	2367	0.339	18	61	623.16	38013	0.94	46	846.522	38940	0.966109
AFVG_250M206	250	24c5949e-176c-4702-8503-482a80e3353e	1302_2	FALSE	38886	481	0.365	23	56	632.36	35412	0.91	43	829.256	35658	0.916988
AFVG_250M207	250	70afd630-e969-435e-a71d-db45de911567	1307_1	FALSE	40635	475	0.382	43	54	669.28	36141	0.89	51	744.882	37989	0.934884
AFVG_250M208	250	6a7515cd-f1a7-4e67-a769-8ab314377fc5	1309_1	FALSE	38232	289	0.482	22	54	637.61	34431	0.9	51	685.765	34974	0.914783
AFVG_250M209	250	5dafe8b0-00ee-4621-91c5-7d13d850bba6	1310_2	TRUE	32545	1421	0.333	33	71	407.28	28917	0.89	56	553.929	31020	0.953142
AFVG_250M210	250	52a84d46-ab36-4955-b950-fd587a332ffd	1310_4	TRUE	32405	1199	0.334	10	78	363.46	28350	0.88	69	423.696	29235	0.902176
AFVG_250M211	250	02abfbd4-8c3a-42fe-a9a5-c73b8355e549	1310_5	TRUE	32854	1647	0.333	19	73	410.22	29946	0.91	60	520.1	31206	0.949839
AFVG_250M212	250	63d5c4bb-5e1e-481f-a62b-09a2f226821b	1314_1	FALSE	63263	1549	0.339	20	126	421.62	53124	0.84	99	577.879	57210	0.90432
AFVG_250M213	250	40e6903f-09fe-4dd2-a0d1-0aa27b0444ca	1319_3	FALSE	38282	186	0.372	48	58	624.16	36201	0.94	58	625.448	36276	0.947599
AFVG_250M214	250	9a0341a3-b116-4cfb-a781-53ec4c2c4f92	1319_4	FALSE	38538	188	0.371	22	65	529.66	34428	0.89	66	522.227	34467	0.894364
AFVG_250M215	250	195850dc-8ed0-4f17-ac92-90f2474fc5d2	1319_5	FALSE	38909	192	0.37	84	62	568.65	35256	0.91	61	581.754	35487	0.912051
AFVG_250M216	250	a7317e3d-c4c3-4c26-9400-15dd45fd5128	1322_2	FALSE	41160	231	0.464	41	53	715.53	37923	0.92	52	727.327	37821	0.918878
AFVG_250M217	250	4e5c6547-ec44-49f7-9a27-8f1931f40336	1323_1	FALSE	40609	213	0.462	50	57	668.05	38079	0.94	56	677.518	37941	0.9343
AFVG_250M218	250	a6c360f7-92d4-47c7-85e0-588671589a6d	1325_1	FALSE	39008	157	0.424	38	48	762.75	36612	0.94	45	830	37350	0.957496
AFVG_250M219	250	ae44118b-d3ae-4d53-9aab-9de358a6582b	1327_1	FALSE	54844	465	0.547	13	101	473.41	47814	0.87	86	583.779	50205	0.915415
AFVG_250M220	250	51cdc671-128f-435e-9ecf-5ac07762e55d	1328_2	FALSE	35724	143	0.323	121	58	575.38	33372	0.93	57	589.632	33609	0.940796
AFVG_250M221	250	4997507e-4de9-4a21-be4d-06867fa4c88c	1331_1	FALSE	38945	310	0.381	25	54	663.44	35826	0.92	49	731.755	35856	0.920683
AFVG_250M222	250	0cbc1790-e3ad-4bc6-9d07-f803d3c934ae	1332_1	FALSE	38080	300	0.325	21	86	376.74	32400	0.85	68	506.162	34419	0.90386
AFVG_250M223	250	a952e510-177f-4be9-90a9-8336590dc078	1335_1	FALSE	38549	130	0.407	11	64	542.39	34713	0.9	60	598.6	35916	0.931697
AFVG_250M224	250	4acb4d76-1c77-4faa-a616-a79ef786acc3	1337_1	FALSE	41268	596	0.385	14	69	547.52	37779	0.91	56	715.446	40065	0.970849
AFVG_250M225	250	0711c84a-b4a2-405b-8656-30c093468746	1339_2	FALSE	44969	585	0.383	13	67	602.24	40350	0.9	68	602.559	40974	0.911161
AFVG_250M226	250	82111ae3-5157-456d-a4cd-36592140004f	1340_2	FALSE	58948	306	0.324	32	105	506.77	53211	0.9	81	679.926	55074	0.934281
AFVG_250M227	250	d2e896c8-e7b4-475e-ad50-ee177c995554	1342_1	FALSE	44220	411	0.524	24	67	561.36	37611	0.85	56	705.107	39486	0.892944
AFVG_250M228	250	e05f928f-3e6f-44b9-803a-1e9d8677f973	1347_2	FALSE	41020	296	0.51	13	62	571.98	35463	0.86	60	592.75	35565	0.867016
AFVG_250M229	250	53b69931-0ca7-4e83-949a-7b5cc3be4c48	1349_1	FALSE	58349	505	0.327	11	124	389.56	48306	0.83	98	544.316	53343	0.914206
AFVG_250M230	250	29cfbff0-7330-4b82-a33e-8c963a2d5352	134_1	FALSE	39515	223	0.445	85	47	789.57	37110	0.94	47	794.043	37320	0.944451
AFVG_250M231	250	a051f898-acac-4753-9187-6b681d87ed5c	1352_2	FALSE	38730	383	0.457	21	52	614.37	31947	0.82	48	705.688	33873	0.874593
AFVG_250M232	250	3f2cfdc9-46de-4507-add7-22ce4777b7b2	1356_3	FALSE	36870	184	0.373	14	74	431.92	31962	0.87	67	515.015	34506	0.935883
AFVG_250M233	250	0c0708cf-73e3-4f8e-9661-e05a23648696	1357_1	FALSE	36429	200	0.377	37	63	501.81	31614	0.87	57	582.842	33222	0.911966
AFVG_250M234	250	cfac7bd0-4431-4a6e-ace3-4e171ce1996b	1358_2	FALSE	36762	219	0.317	38	76	422.84	32136	0.87	56	616.232	34509	0.938714
AFVG_250M235	250	f0590b5c-e494-4b73-be1a-d0ef0396f2d5	135_1	FALSE	61485	174	0.362	33	95	617.56	58668	0.95	94	631.819	59391	0.965943
AFVG_250M236	250	e513288e-0242-4ccf-88b7-ae7b332d1931	1364_1	FALSE	40932	297	0.513	33	54	673	36342	0.89	56	661.875	37065	0.905526
AFVG_250M237	250	dc5f2a17-c38d-49b1-a378-dd56442a558d	1364_3	FALSE	40292	284	0.514	21	57	615.42	35079	0.87	56	631.554	35367	0.877767
AFVG_250M238	250	b5cc7bc5-4e7f-4add-b115-46a28d5bd845	1365_1	FALSE	40242	296	0.516	45	59	624.36	36837	0.91	56	671.196	37587	0.934024
AFVG_250M239	250	87596cc2-15b8-4f89-999f-5be6a6b6cb75	1366_1	FALSE	39052	205	0.355	24	85	390.6	33201	0.85	63	576.524	36321	0.930068
AFVG_250M240	250	e43f9fb6-8e61-411a-ba7a-86aa2e17638a	1368_1	FALSE	43505	265	0.436	21	73	550.15	40161	0.92	75	548.88	41166	0.946236
AFVG_250M241	250	3397d5f0-157b-4910-a0b0-739ba4b28142	136_2	FALSE	59552	790	0.399	51	101	532.49	53781	0.9	76	751.026	57078	0.958456
AFVG_250M242	250	c0fab9e4-2724-4a43-bf97-b9223ab68a3d	1370_1	FALSE	67499	370	0.409	40	80	783.15	62652	0.93	78	800.5	62439	0.925036
AFVG_250M243	250	db9e3a0e-1bc9-4017-9867-5ee25523a9db	1372_1	FALSE	33331	339	0.563	11	71	343.73	24405	0.73	67	382.478	25626	0.768834
AFVG_250M244	250	95ac6766-544a-4c80-93b8-2d5ffd25884b	1373_1	FALSE	35217	221	0.367	15	59	517.27	30519	0.87	54	599	32346	0.918477
AFVG_250M245	250	5a2cdfe1-7716-476b-aa85-888df183ca98	137_2	FALSE	40339	317	0.481	10	71	369.42	26229	0.65	51	656	33456	0.829371
AFVG_250M246	250	75f6b124-ee3b-47bb-8352-d4c4bfcdad0b	1383_4	FALSE	43256	283	0.335	22	84	448.21	37650	0.87	80	498.712	39897	0.922346
AFVG_250M247	250	8469f59c-4f14-44e7-8367-d76ccfe70b60	1384_3	FALSE	40564	441	0.493	29	74	443.27	32802	0.81	56	642.536	35982	0.887043
AFVG_250M248	250	54febf92-cc7c-4478-b87c-7b16ca6f8aed	1385_3	FALSE	38150	324	0.43	39	61	547.82	33417	0.88	56	615.696	34479	0.903775
AFVG_250M249	250	0a0a4811-8d17-48d3-9bde-80e445f7b7b5	1391_1	FALSE	38657	306	0.475	30	59	606.25	35769	0.92	56	649.607	36378	0.941046
AFVG_250M250	250	44294e61-4225-4c62-8ba8-6aa54194eb1e	139_5	FALSE	43777	289	0.348	75	86	461.13	39657	0.9	83	489.325	40614	0.927747
AFVG_250M251	250	f9f5c174-0621-4cc9-a834-783b8d358bea	139_6	FALSE	43740	289	0.348	61	75	548.36	41127	0.94	77	542.961	41808	0.95583
AFVG_250M252	250	961f82fd-f9ca-41a9-abff-61794b5c6f20	13_4	FALSE	43349	281	0.521	66	62	663.39	41130	0.95	61	672.246	41007	0.945973
AFVG_250M253	250	d1680cf2-e018-46f9-b1a8-ba16176c3316	1402_3	FALSE	36568	156	0.566	11	83	379.19	31473	0.86	80	419.55	33564	0.917852
AFVG_250M254	250	7f661ffd-e5af-46b9-867f-f0dc2cf3c4ec	1403_1	FALSE	39915	1093	0.434	13	60	570.45	34227	0.86	47	763.468	35883	0.898985
AFVG_250M255	250	77f560d1-5192-4ec9-a185-c020bede390f	1408_4	TRUE	30624	1959	0.329	25	68	409.15	27822	0.91	65	434.215	28224	0.92163
AFVG_250M256	250	ec73f02f-c3b9-45a7-a604-4fc63ef996e4	1408_7	TRUE	29541	871	0.329	33	63	433.67	27321	0.92	61	453.639	27672	0.936732
AFVG_250M257	250	131affa7-bebe-4211-bda9-3d40feda7f91	1408_8	TRUE	29344	676	0.329	35	59	459.56	27114	0.92	54	509.667	27522	0.937909
AFVG_250M258	250	e9dc1eae-83bb-4e65-9e74-2e635283472f	140_2	FALSE	39661	164	0.368	76	58	625.91	36303	0.91	58	628.603	36459	0.919266
AFVG_250M259	250	9c292cff-67fa-4c65-ab23-bba6b5cc9d88	1410_1	FALSE	41724	427	0.453	11	72	514.04	37011	0.89	73	512.219	37392	0.896175
AFVG_250M260	250	3094191b-0eaf-439f-8ea8-201e9158169f	1410_2	FALSE	41602	368	0.453	84	56	686.3	38433	0.92	54	711.5	38421	0.923537
AFVG_250M261	250	a34620f2-2112-4d34-912c-a5883417ddef	1410_5	FALSE	41948	358	0.452	39	57	679.37	38724	0.92	57	679.368	38724	0.923143
AFVG_250M262	250	8fc0836a-3180-44eb-aa10-85e831e09898	1410_6	FALSE	42079	418	0.453	20	64	591.7	37869	0.9	65	585.6	38064	0.904584
AFVG_250M263	250	02a156f1-2d85-49e7-b5e8-3164d0091392	1410_8	FALSE	42163	368	0.452	27	60	636.3	38178	0.91	60	639.7	38382	0.910324
AFVG_250M264	250	e0679c9d-3c9d-4c94-9c84-8aa225799406	1412_1	FALSE	43926	414	0.523	28	74	529.46	39180	0.89	61	670.426	40896	0.93102
AFVG_250M265	250	07ea395c-bf8a-4bfa-a4de-4a331c6613a8	1414_2	FALSE	38550	345	0.436	27	48	734.44	35253	0.91	47	758.234	35637	0.924436
AFVG_250M266	250	fdaf2579-9447-422e-bcc0-6de2500a3bb1	1414_3	FALSE	38787	348	0.435	39	54	672.33	36306	0.94	53	690.283	36585	0.943228
AFVG_250M267	250	808eb54a-8120-47e0-aff1-667c8cfbad10	1416_1	FALSE	38379	144	0.424	20	73	473.75	34584	0.9	61	593.066	36177	0.942625
AFVG_250M268	250	fe1fc082-eef1-4a5a-8167-4774b2e3a11c	141_4	FALSE	42713	264	0.434	50	67	594.22	39813	0.93	60	666.85	40011	0.936741
AFVG_250M269	250	71433bad-727c-4dc4-adc8-0bdfdd6d4ff0	1423_1	FALSE	38965	141	0.393	20	65	518.4	33696	0.86	59	615.407	36309	0.931836
AFVG_250M270	250	398fe9c7-c71c-4ff3-b738-77314114fe03	1430_1	FALSE	38596	172	0.368	48	62	569.27	35295	0.91	57	639.842	36471	0.944942
AFVG_250M271	250	9ef07a68-2315-4b0d-9ade-2e9d943771a3	1431_3	FALSE	36767	402	0.413	23	53	621.74	32952	0.9	53	624.906	33120	0.900808
AFVG_250M272	250	2811f74e-6e5c-4822-90c6-5958ebbf30b9	1431_4	FALSE	36288	390	0.414	52	49	650.08	31854	0.88	52	628.846	32700	0.901124
AFVG_250M273	250	e63e7590-4da9-4b4b-8f19-b12ab5f4be01	1435_5	FALSE	38769	217	0.356	35	76	461.29	35058	0.9	67	551.821	36972	0.953649
AFVG_250M274	250	25239b3a-63b7-4138-94b2-126ae78e54bc	1438_2	FALSE	39303	138	0.337	28	53	688.13	36471	0.93	44	835.364	36756	0.935196
AFVG_250M275	250	5d688740-e545-4007-8d6d-9905dc54d10b	1439_1	FALSE	39459	391	0.443	13	88	351.72	30951	0.78	53	693.396	36750	0.931346
AFVG_250M276	250	49f650e2-9c32-47cf-8d80-e90833cc6969	143_1	FALSE	35821	315	0.533	24	55	557.84	30681	0.85	45	723.267	32547	0.908601
AFVG_250M277	250	b9477f9b-1bc3-432c-a126-ecdf6f479f2c	1442_1	FALSE	37783	99	0.347	30	55	626.51	34458	0.91	54	636.389	34365	0.909536
AFVG_250M278	250	f02ca45f-f869-435f-901c-3322429f96c1	1442_2	FALSE	37799	104	0.347	74	54	648.33	35010	0.93	52	670.731	34878	0.922723
AFVG_250M279	250	ecaa9410-3e1c-4959-8ab5-61cecb0f24b1	1446_4	FALSE	40923	249	0.329	46	85	435.6	37026	0.9	72	535.083	38526	0.941427
AFVG_250M280	250	6965ed94-2d81-4073-8945-e2e518a6e7e2	1447_1	FALSE	54408	152	0.461	28	70	703.41	49239	0.9	62	822.29	50982	0.937031
AFVG_250M281	250	6d416d61-3d6f-4656-b226-79e99951ba30	1449_2	TRUE	42844	174	0.451	27	49	769.53	37707	0.88	49	815.694	39969	0.932896
AFVG_250M282	250	b474c5dd-e0ea-4aed-8ad3-8260269892ac	144_1	FALSE	36103	528	0.528	48	59	526.98	31092	0.86	55	574.909	31620	0.875827
AFVG_250M283	250	f33cc85f-1908-4caa-aacd-56bf0793f946	1450_1	FALSE	60266	1262	0.435	20	90	620.27	55824	0.93	80	712.837	57027	0.946255
AFVG_250M284	250	2aa46a38-05d6-4d24-afc9-7e78a70e0fe2	1451_1	FALSE	39901	136	0.41	11	63	525.76	33123	0.83	51	720.294	36735	0.920654
AFVG_250M285	250	ff6c146a-271c-4a88-b50b-e2264eb9cfb0	1453_2	FALSE	40183	237	0.493	53	51	718.18	36627	0.91	46	809.152	37221	0.926287
AFVG_250M286	250	e718e570-09d4-4969-9553-3ef784730818	1456_2	FALSE	39784	78	0.347	14	84	233.71	19632	0.5	65	559.569	36372	0.914237
AFVG_250M287	250	7179997b-0be6-4551-be43-3c397bfc0a2d	1459_1	FALSE	30445	141	0.324	37	60	477	28620	0.94	56	507.75	28434	0.933946
AFVG_250M288	250	4b8a827e-2ece-438f-863d-70888c6c4aa6	145_2	FALSE	40514	476	0.349	37	52	702.52	36531	0.9	51	718.235	36630	0.904132
AFVG_250M289	250	621c9ce4-e710-4ba6-9bf1-1f138c2f7736	1461_1	FALSE	36920	285	0.317	18	76	445.74	33876	0.92	67	525.851	35232	0.95428
AFVG_250M290	250	e3c52404-140b-4491-8485-fe34e68cac26	1463_1	FALSE	59985	244	0.327	14	108	493.44	53292	0.89	94	604.819	56853	0.947787
AFVG_250M291	250	e8d2c7bc-3ccf-44f6-9ea5-dd238d412d0f	1465_10	FALSE	42305	372	0.34	71	84	466.89	39219	0.93	84	469.25	39417	0.931734
AFVG_250M292	250	a8bb42a7-9175-4f8a-8a58-95f078d6f54d	1465_3	FALSE	41536	366	0.341	15	89	408.98	36399	0.87	91	409.582	37272	0.897342
AFVG_250M293	250	64a91c93-9c58-44ad-aeef-a1b3bf2a589e	1465_4	FALSE	41329	386	0.34	10	96	359.38	34500	0.83	95	376.832	35799	0.866196
AFVG_250M294	250	d49470e4-4c40-4180-8a0e-d1f2d6edbaf2	1465_8	FALSE	41619	380	0.34	40	81	471.15	38163	0.92	80	484.65	38772	0.931594
AFVG_250M295	250	1741aa00-d396-4b11-a4d6-b8b3739939c5	1469_2	FALSE	42930	196	0.341	33	81	476.63	38607	0.9	79	505.025	39897	0.92935
AFVG_250M296	250	9e2ef6b3-5a32-489b-b7ee-f20312ed96bb	1471_1	FALSE	36826	349	0.322	41	61	565.33	34485	0.94	60	581.6	34896	0.947591
AFVG_250M297	250	b26db406-b477-47c6-949f-212a86408ee8	1471_2	FALSE	36839	357	0.322	42	62	546.44	33879	0.92	60	566.75	34005	0.923071
AFVG_250M298	250	24ae52fe-b766-4446-a7b0-1015e0701a80	1473_1	FALSE	40683	213	0.46	15	64	576.75	36912	0.91	42	883.929	37125	0.912543
AFVG_250M299	250	ab3a6b4d-c1df-4db3-ad45-be7eb92cca42	1474_1	FALSE	37493	373	0.362	13	63	524.62	33051	0.88	50	700.8	35040	0.934574
AFVG_250M300	250	a87e4024-ec23-492f-a7b7-800bb64bf7c9	1475_2	FALSE	38300	221	0.358	35	80	412.61	33009	0.86	63	563.667	35511	0.92718
AFVG_250M301	250	55d0e1ff-762c-4baa-b959-5e862da6bf55	1479_3	FALSE	45914	214	0.395	54	54	780.89	42168	0.92	54	782.222	42240	0.919981
AFVG_250M302	250	71c5dc66-eb8c-4451-aab0-4abd496c944c	1479_4	FALSE	45905	205	0.395	32	56	762.11	42678	0.93	54	788.333	42570	0.92735
AFVG_250M303	250	c1accb3d-5f01-4c08-a99a-9fbe898f4279	1481_1	FALSE	37250	460	0.382	40	56	600.7	33639	0.9	56	608.839	34095	0.915302
AFVG_250M304	250	42cfef91-fd1f-4495-999c-3aa3f641f7d9	1483_1	FALSE	50499	709	0.337	15	97	220.76	21414	0.43	82	570.293	46764	0.926038
AFVG_250M305	250	2bcf09a3-463d-412c-99c4-1ef738df855e	1485_3	FALSE	46757	857	0.336	17	120	240.88	28905	0.62	77	538.013	41427	0.886006
AFVG_250M306	250	86e7555b-4f6b-4d36-98db-e00d3e90f21b	1486_1	FALSE	48585	295	0.342	42	57	826.42	47106	0.97	50	941.64	47082	0.969065
AFVG_250M307	250	3357aa40-f253-4193-96fb-ad25ac095128	1490_1	FALSE	52623	168	0.352	26	73	657.16	47973	0.91	72	694.75	50022	0.950573
AFVG_250M308	250	ffa372f0-1571-4183-a3f0-775fdc89176c	1492_1	FALSE	42210	387	0.515	63	60	643.4	38604	0.91	58	661.034	38340	0.908316
AFVG_250M309	250	a845cf31-0008-40ab-b33e-7e5fbc542b51	1494_1	FALSE	39100	196	0.402	11	64	531.23	33999	0.87	60	609.7	36582	0.935601
AFVG_250M310	250	ee6c6de5-3c05-4425-8a6f-1897d0873c32	1495_1	FALSE	53873	253	0.39	19	97	441.65	42840	0.79	69	734.696	50694	0.940991
AFVG_250M311	250	36133910-fb40-4d9d-a0b1-6cb3d063c059	1498_1	FALSE	41245	251	0.44	20	58	658.09	38169	0.92	56	694.125	38871	0.942442
AFVG_250M312	250	80f2faeb-e4de-4cc7-9c47-c5dc47966338	149_1	FALSE	38516	247	0.336	76	53	675.51	35802	0.93	52	691.731	35970	0.933898
AFVG_250M313	250	57fb6702-ad10-419e-9c9b-4aff8e8d4efc	1500_1	FALSE	36299	141	0.334	30	73	465.86	34008	0.94	69	499.304	34452	0.949117
AFVG_250M314	250	a7b0c06b-819e-4409-8822-6c70f4690f10	1500_2	TRUE	35307	141	0.335	15	76	363.2	27603	0.78	73	396.616	28953	0.820036
AFVG_250M315	250	51aa917b-4876-4a3e-b42c-f111f638d10f	1501_1	FALSE	39615	181	0.406	10	77	430.21	33126	0.84	62	577.016	35775	0.903067
AFVG_250M316	250	66d60f26-3699-453c-997b-7e5111c987d5	1502_1	FALSE	39350	174	0.409	12	70	485.66	33996	0.86	58	627.414	36390	0.924778
AFVG_250M317	250	b05fb5fe-c857-4727-93cb-7e1ab36cdcb0	1503_1	FALSE	39319	211	0.333	14	74	445.54	32970	0.84	62	588.823	36507	0.928482
AFVG_250M318	250	43ee2ec0-1bee-4025-a6df-143b6496fab5	1506_1	FALSE	35496	207	0.363	10	82	306.77	25155	0.71	67	468.493	31389	0.884297
AFVG_250M319	250	0e88f45a-7f10-478b-a652-82d3ec7b59d2	1508_1	FALSE	42308	367	0.344	11	89	410.46	36531	0.86	84	457.429	38424	0.908197
AFVG_250M320	250	c762bd4c-9530-4ce8-b261-fb0dcc4d5fc6	1510_2	FALSE	56529	486	0.528	51	74	691.66	51183	0.9	70	733.2	51324	0.907923
AFVG_250M321	250	aec198c5-6621-4214-87f5-901e140ac1f8	1510_3	FALSE	56478	487	0.528	19	83	595.23	49404	0.87	81	627.37	50817	0.899766
AFVG_250M322	250	c76bf753-c4f1-47e3-a7fc-fd040e6dfad5	1514_1	FALSE	35254	258	0.309	38	80	363.9	29112	0.83	63	529.048	33330	0.945425
AFVG_250M323	250	687d70db-5c3d-4907-9481-4456d7e478fa	1517_1	FALSE	36234	252	0.635	16	48	606.81	29127	0.8	41	820.171	33627	0.928051
AFVG_250M324	250	4efcadf4-36a2-42f3-9460-85a45bb1080c	1518_1	FALSE	46125	138	0.483	12	60	715.35	42921	0.93	47	905.745	42570	0.922927
AFVG_250M325	250	45c2e6ae-640d-42b3-8e3a-5bda268b9c79	1521_1	FALSE	44295	352	0.53	20	73	555	40515	0.91	62	654.871	40602	0.916627
AFVG_250M326	250	417cf60b-a8bd-41fe-9e47-86ee2109362a	1522_2	FALSE	43532	345	0.535	11	79	472.14	37299	0.86	74	521.27	38574	0.886107
AFVG_250M327	250	be4e3b6a-0efa-455a-9909-043884648aa2	1525_2	FALSE	33053	140	0.323	19	70	405.17	28362	0.86	64	471.703	30189	0.913351
AFVG_250M328	250	86137d5a-8a9f-4f89-bcc9-1348cc28f143	152_1	FALSE	41558	132	0.444	15	67	597.72	40047	0.96	65	616.154	40050	0.963713
AFVG_250M329	250	0b75656b-c706-458d-aae1-fc3f31a6a9d5	152_2	FALSE	41545	132	0.444	10	73	526.93	38466	0.92	73	526.562	38439	0.925238
AFVG_250M330	250	8d476a4d-b6a6-4125-99e2-5c99d67c0a8d	152_4	FALSE	41415	133	0.444	27	59	669.61	39507	0.95	58	685.759	39774	0.960377
AFVG_250M331	250	d168e0b6-d0a5-4ea1-a8d0-148816c83cb3	1530_1	FALSE	39412	201	0.335	15	73	430.19	31404	0.8	67	508.03	34038	0.863646
AFVG_250M332	250	c7cbf54f-11bf-49ba-884c-aacdb0e40104	1531_3	FALSE	39982	193	0.387	12	85	354.25	30111	0.75	62	593.806	36816	0.920814
AFVG_250M333	250	57972836-c731-4206-b08c-89d5f9c6c83e	1535_1	FALSE	39728	583	0.387	17	54	689	37206	0.94	39	976.154	38070	0.958266
AFVG_250M334	250	1d4159c6-ccdf-4050-ab5d-f7cb7c8f7a3e	1543_1	FALSE	35330	142	0.32	22	70	468.99	32829	0.93	62	532.597	33021	0.934645
AFVG_250M335	250	3e169d00-40a6-4102-97cc-59360e682fcf	1547_2	FALSE	39471	313	0.619	41	68	530.03	36042	0.91	60	621.45	37287	0.944668
AFVG_250M336	250	ee1969c1-fae6-4c92-9c07-064c69a177e3	1549_2	FALSE	38181	195	0.411	59	62	582.73	36129	0.95	62	588	36456	0.95482
AFVG_250M337	250	a7c9380c-0e89-453b-9a9f-c69e70766b87	154_1	FALSE	40313	299	0.439	13	71	494.03	35076	0.87	68	519.529	35328	0.876343
AFVG_250M338	250	a112311a-3e57-4b43-8b38-67e38dea766c	1550_1	FALSE	41556	615	0.53	22	55	700.8	38544	0.93	49	789.612	38691	0.931057
AFVG_250M339	250	ee1d9009-5754-4190-a86d-b9b5977004a7	1553_1	FALSE	42181	450	0.329	22	80	491.06	39285	0.93	75	534.12	40059	0.949693
AFVG_250M340	250	af93a75e-ca55-443c-b810-bef803cacc66	1555_1	FALSE	40098	245	0.447	33	61	612.49	37362	0.93	61	624	38064	0.949274
AFVG_250M341	250	e2c395ba-6d48-4d21-bb2f-c53769de9875	1556_5	FALSE	40997	244	0.445	32	69	559.09	38577	0.94	66	585.545	38646	0.942654
AFVG_250M342	250	1db6ccc1-9b83-427c-aeaf-00cc7e5e5216	1556_7	FALSE	40656	233	0.447	74	60	634.1	38046	0.93	60	638.6	38316	0.942444
AFVG_250M343	250	33484a5c-6a8b-4f8d-bda4-f1f081eca086	1557_1	FALSE	38795	427	0.529	32	62	531.82	32973	0.85	59	587.034	34635	0.89277
AFVG_250M344	250	532a1c5f-3fcd-485b-9752-bb3c84fb950b	1557_2	FALSE	38577	472	0.531	13	70	453.9	31773	0.82	65	508.708	33066	0.857143
AFVG_250M345	250	53a63bb4-76ee-4e33-9c0a-f63e4e8b8a1e	1558_1	FALSE	38061	246	0.343	24	60	587.25	35235	0.92	54	664.111	35862	0.942224
AFVG_250M346	250	3c9e5481-b630-4a8d-ae12-a73d2ea88c15	1559_1	FALSE	59523	259	0.299	14	137	304.18	41673	0.7	91	599.209	54528	0.916083
AFVG_250M347	250	84a46ac5-2cc8-4c32-a810-41b77f4e968d	155_10	FALSE	53755	321	0.428	54	73	671.3	49005	0.91	73	670.767	48966	0.910911
AFVG_250M348	250	b5fff6fd-35ee-4558-a490-b4fb789d4260	155_11	FALSE	53806	306	0.428	84	75	655.56	49167	0.91	74	666.892	49350	0.917184
AFVG_250M349	250	d6d78c59-99c9-4b86-aec9-87fcfcc03636	155_8	FALSE	53657	308	0.428	70	77	638.34	49152	0.92	75	652.6	48945	0.912183
AFVG_250M350	250	f5eb5ef9-ffc5-4cac-b628-bc9da4cbb38e	155_9	FALSE	53690	306	0.428	15	88	531.89	46806	0.87	84	567.607	47679	0.888042
AFVG_250M351	250	64a7d940-092d-4623-aaae-da74c5023d1d	1560_1	FALSE	57410	290	0.487	10	111	443.7	49251	0.86	80	675.3	54024	0.941021
AFVG_250M352	250	a81a05c3-c9eb-4b73-b711-fb500d699038	1562_1	FALSE	36494	163	0.494	29	68	489.57	33291	0.91	53	641.377	33993	0.931468
AFVG_250M353	250	b8472643-fe3c-424d-bdab-389c55433fa1	1563_1	FALSE	41954	432	0.33	18	87	425.86	37050	0.88	85	459.529	39060	0.93102
AFVG_250M354	250	85c0ccca-5320-4948-a4bf-d53760a6d124	1564_1	FALSE	38648	140	0.338	10	71	454.01	32235	0.83	62	549	34038	0.880718
AFVG_250M355	250	664bee85-3161-4173-adea-7668a1159b99	1568_1	FALSE	39890	206	0.325	51	72	499.5	35964	0.9	69	540.609	37302	0.935122
AFVG_250M356	250	06909190-a105-404b-bfe1-4a1516398da4	1569_1	FALSE	38390	128	0.473	17	66	513.59	33897	0.88	54	602	32508	0.846783
AFVG_250M357	250	e8d5b4db-6d8d-4422-8016-942775195f73	1569_2	FALSE	38604	124	0.474	20	57	560.11	31926	0.83	57	568.421	32400	0.839291
AFVG_250M358	250	46536b2c-eb26-45ba-a89b-d8bc02851227	1570_1	FALSE	39512	118	0.473	24	69	485.87	33525	0.85	63	542.429	34173	0.864876
AFVG_250M359	250	647287f5-5c6b-4a66-8cd7-61120106466e	1570_2	FALSE	39043	126	0.473	22	70	473.4	33138	0.85	64	542.438	34716	0.889173
AFVG_250M360	250	116742d7-6d4a-443c-ab2f-a9dd80ba252b	1574_1	FALSE	38770	212	0.438	65	49	734.94	36012	0.93	48	754.938	36237	0.934666
AFVG_250M361	250	16b64770-ea7b-4e93-a226-029d6ff6e00a	1574_3	FALSE	39065	197	0.437	17	60	583.9	35034	0.9	56	634.554	35535	0.909638
AFVG_250M362	250	3fa395fb-2a80-4b3c-9519-fda150bfeb84	1578_2	FALSE	50767	473	0.337	21	75	624.84	46863	0.92	61	798.738	48723	0.959738
AFVG_250M363	250	41970138-b327-4b72-81ce-765f2afff4b1	1578_6	FALSE	49605	268	0.336	11	85	528.92	44958	0.91	61	776.656	47376	0.955065
AFVG_250M364	250	cfb7ce58-e586-4b7a-8d70-989fdd4c2205	1579_1	FALSE	41092	413	0.38	16	59	630.81	37218	0.9	52	729.865	37953	0.92361
AFVG_250M365	250	b531eaa2-3666-44ac-999f-fc15c6118d81	157_1	FALSE	40005	152	0.451	29	59	635.85	37515	0.94	58	646.655	37506	0.937533
AFVG_250M366	250	1b725958-c038-4000-ae5a-083334d1e91e	157_2	FALSE	40019	159	0.451	32	61	610.97	37269	0.93	61	615.148	37524	0.937655
AFVG_250M367	250	efd0d7b2-5fb3-460a-939f-0ec1242be130	157_4	FALSE	40119	32	0.451	27	59	645.1	38061	0.95	58	659.069	38226	0.952815
AFVG_250M368	250	6e8a5cbf-afe5-48e1-8b97-41c4feeb3ab1	1581_1	FALSE	36413	289	0.306	22	68	472.5	32130	0.88	66	494.773	32655	0.896795
AFVG_250M369	250	2b88566e-2128-41ce-a2d2-9789354101fa	1582_1	FALSE	36941	879	0.492	18	52	548.83	28539	0.77	55	610.964	33603	0.90964
AFVG_250M370	250	07155e3d-c1e8-48fd-94b7-e82536d23c2a	1588_1	FALSE	32753	353	0.313	18	79	338.09	26709	0.81	64	450.281	28818	0.879858
AFVG_250M371	250	e685944f-35e8-4a9b-b6e9-ce87b82cbf00	158_1	FALSE	42643	138	0.464	20	60	593.3	35598	0.83	57	697.053	39732	0.931736
AFVG_250M372	250	dfbfc4e4-3c51-4771-a712-1ac8d2f473b0	1594_2	FALSE	39476	296	0.391	48	65	509.22	33099	0.84	61	563.754	34389	0.871137
AFVG_250M373	250	fa675013-534e-4587-ad59-d04b6c875ef9	1598_1	FALSE	41305	261	0.329	12	84	427.07	35874	0.87	66	580.591	38319	0.927709
AFVG_250M374	250	214d2a60-4992-46a7-a985-31a6865b1ea1	15_1	FALSE	38670	520	0.515	14	60	526.55	31593	0.82	59	597.458	35250	0.911559
AFVG_250M375	250	f8916248-6e2f-4713-8a75-48055a971455	1600_1	FALSE	59832	198	0.358	15	112	482.36	54024	0.9	99	578.03	57225	0.956428
AFVG_250M376	250	56f9e6aa-906d-4460-a7d1-a57936704399	1602_6	FALSE	41151	100	0.448	39	60	615.75	36945	0.9	52	726.231	37764	0.917693
AFVG_250M377	250	4a6de8c8-bd54-4018-91a2-576839824c97	1604_1	FALSE	41250	284	0.443	16	82	436.24	35772	0.87	74	487.784	36096	0.875055
AFVG_250M378	250	8b456ed3-8715-45b2-aa77-b9a9d1106c6e	1604_2	FALSE	41300	280	0.444	16	75	496.4	37230	0.9	70	535.5	37485	0.907627
AFVG_250M379	250	76a63184-723e-4c66-bf98-b21502e8ae8a	1606_1	FALSE	41634	760	0.364	35	71	547.27	38856	0.93	70	558.386	39087	0.938824
AFVG_250M380	250	d48121fa-c3d1-4370-85ad-aed0249ea30f	1613_4	FALSE	41456	444	0.56	20	74	514.82	38097	0.92	57	679.737	38745	0.934605
AFVG_250M381	250	9e4996db-1ef8-4a46-868e-b5e4a3af2674	1613_5	FALSE	41541	448	0.56	18	77	493.87	38028	0.92	68	570.397	38787	0.933704
AFVG_250M382	250	f13493e3-c848-468c-a850-67ac3ea819c8	1617_1	FALSE	37418	283	0.357	17	88	329.66	29010	0.77	62	551.903	34218	0.91448
AFVG_250M383	250	b102e96e-a25a-4f47-b55c-f29e4254233c	1618_2	FALSE	38022	212	0.355	16	89	330.64	29427	0.77	69	491.652	33924	0.89222
AFVG_250M384	250	77b78556-f6bc-4708-bb51-0c1df8091592	1619_1	FALSE	42139	299	0.34	23	85	449.47	38205	0.91	84	466.964	39225	0.930848
AFVG_250M385	250	2ebfcace-7b8c-4e7e-aae7-f8106bffa28f	161_1	FALSE	42648	87	0.439	47	54	749.83	40491	0.95	53	766.415	40620	0.952448
AFVG_250M386	250	35ebad1d-4d91-4210-98bc-fa2054de8c87	1621_1	FALSE	41922	360	0.341	20	87	449.14	39075	0.93	80	492.188	39375	0.939244
AFVG_250M387	250	c1f94c19-45f3-4db5-9b2e-dae333b41f5f	1626_2	FALSE	56704	150	0.324	20	98	512.88	50262	0.89	80	671.513	53721	0.947393
AFVG_250M388	250	3ca11d14-7d05-4cb4-bd73-984d560a5727	1627_1	FALSE	36704	314	0.332	20	61	542.46	33090	0.9	57	597.474	34056	0.927855
AFVG_250M389	250	e0f9595c-fa08-4601-aee2-a9124109eda0	1629_1	FALSE	60325	243	0.324	22	96	586.66	56319	0.93	90	650.3	58527	0.970195
AFVG_250M390	250	650c2915-59f2-4a2d-af3d-c3eab0c18b96	162_1	FALSE	38523	245	0.462	50	63	571.1	35979	0.93	61	598.033	36480	0.946967
AFVG_250M391	250	b61b2b84-290f-4eb7-9b1a-2a3b78ffdf8d	1635_1	FALSE	38736	262	0.588	25	60	586.7	35202	0.91	58	604.448	35058	0.90505
AFVG_250M392	250	0cb7d94b-2cb6-45da-80aa-c92814f1dfab	1636_1	FALSE	42495	131	0.32	10	70	478.46	33492	0.79	59	655.322	38664	0.909848
AFVG_250M393	250	00a2048c-ef4d-4620-aa3a-8309bca2415f	1638_1	FALSE	60627	3458	0.386	46	78	693.65	54105	0.89	77	705.39	54315	0.895888
AFVG_250M394	250	c9fc22e4-b15a-40a0-9a15-2d5f616944c6	1638_2	FALSE	61045	3499	0.386	26	87	612.38	53277	0.87	85	625.553	53172	0.87103
AFVG_250M395	250	1a9b05fb-af35-47f1-a466-71cf77ee2f0f	1639_1	FALSE	35971	208	0.371	14	58	555.93	32244	0.9	59	566.441	33420	0.929082
AFVG_250M396	250	c47705c9-351d-40fc-a1d7-18cfa3a29fbc	163_1	FALSE	41293	103	0.493	48	63	631.29	39771	0.96	60	666.1	39966	0.967864
AFVG_250M397	250	f592e052-5d7a-4eed-a242-388a7eed03c9	1643_3	FALSE	49780	476	0.495	30	77	575.26	44295	0.89	74	613.419	45393	0.911872
AFVG_250M398	250	5406ad6b-925f-49d5-acbe-764916cbda86	1644_1	FALSE	50878	491	0.496	53	80	588.49	47079	0.92	79	595.215	47022	0.924211
AFVG_250M399	250	c17cb8e7-a27c-4889-a861-492084801178	1644_2	FALSE	50815	471	0.497	56	79	589.33	46557	0.91	78	599.692	46776	0.920516
AFVG_250M400	250	9c598d14-366d-4184-91aa-1d013863897a	1644_3	FALSE	50470	497	0.496	28	80	562.58	45006	0.89	79	576.949	45579	0.903091
AFVG_250M401	250	1120aca1-6e1d-4914-9e65-bf62580ba2bd	1647_1	FALSE	39068	298	0.572	50	50	702.3	35115	0.9	48	733	35184	0.900584
AFVG_250M402	250	7617fcbd-d87f-41a5-b10c-26e5753b6d19	164_1	FALSE	39901	144	0.491	30	59	657.76	38808	0.97	55	692.182	38070	0.954111
AFVG_250M403	250	52723e6f-dfeb-4ff0-a925-d67ebf51cb7d	1651_1	FALSE	53439	191	0.375	17	95	501.88	47679	0.89	81	624.852	50613	0.947117
AFVG_250M404	250	998bcbd7-c495-42fe-8d41-2f050df21d7a	1652_1	FALSE	41608	108	0.446	12	61	629.16	38379	0.92	56	704.357	39444	0.947991
AFVG_250M405	250	e640e478-75c0-4ae3-bca8-c172b4652f1c	1654_3	FALSE	36914	231	0.503	36	46	720.39	33138	0.9	45	748.067	33663	0.91193
AFVG_250M406	250	929d27be-4e09-414d-b2ae-4b298bc383dd	1654_4	FALSE	36925	241	0.503	33	49	657.67	32226	0.87	44	762.477	33549	0.908571
AFVG_250M407	250	d912a02e-dbf8-4f72-824a-76a12e4c15a5	1655_1	FALSE	36432	394	0.382	29	61	523.33	31923	0.88	54	604.389	32637	0.895833
AFVG_250M408	250	28014842-4a57-4fc6-ab29-4019390b4377	1656_1	FALSE	40704	213	0.311	10	93	206.45	19200	0.47	88	345.477	30402	0.746904
AFVG_250M409	250	a703edb5-44fe-49be-be60-c4dad3db96d8	1660_1	FALSE	42316	453	0.33	12	96	391.69	37602	0.89	86	459.628	39528	0.934115
AFVG_250M410	250	7f877a03-73fa-4d84-9887-f2c54c18b754	1665_5	FALSE	50645	194	0.38	12	118	338.82	39981	0.79	69	670.522	46266	0.913535
AFVG_250M411	250	abe29370-9a0c-47f7-8bb6-0673fc2d059b	166_3	FALSE	40737	456	0.531	12	67	529.25	35460	0.87	59	630.61	37206	0.913322
AFVG_250M412	250	0ac21035-6ba5-4dc6-9998-1e675d521fd0	1673_1	FALSE	45713	346	0.433	15	66	611.27	40344	0.88	51	830.471	42354	0.92652
AFVG_250M413	250	a8b99e0c-fd7b-4a41-a9e5-247324909e0c	1674_2	FALSE	41124	406	0.467	21	63	527.52	33234	0.81	53	700.811	37143	0.903195
AFVG_250M414	250	0d68efd1-a1c9-4363-9691-08c160cfa361	1680_1	FALSE	38600	295	0.394	16	72	442	31824	0.82	66	489.591	32313	0.837124
AFVG_250M415	250	27032c48-7675-4bd1-a4a9-0add9d5e0a59	1681_1	FALSE	39045	196	0.445	17	73	431.42	31494	0.81	66	525.273	34668	0.887899
AFVG_250M416	250	cb30e391-9cf1-47fd-9ff9-4aceddfb9412	1684_1	FALSE	71319	4246	0.371	11	138	437.24	60339	0.85	113	580.54	65601	0.919825
AFVG_250M417	250	5dc1fedd-b616-4050-8977-2fbcc618e439	1687_2	FALSE	38523	268	0.392	12	68	453.97	30870	0.8	50	702.18	35109	0.911378
AFVG_250M418	250	d9c054a5-824d-4ef7-8c50-5300e8bef7c8	1688_1	FALSE	46357	263	0.382	10	82	481.9	39516	0.85	73	582.082	42492	0.916625
AFVG_250M419	250	5843ba75-620a-481a-835f-5982fe4cbb57	1689_2	FALSE	38941	188	0.479	16	79	435.87	34434	0.88	65	554.862	36066	0.92617
AFVG_250M420	250	99ca03ab-554f-42a2-b04c-20e6aed68b32	169_8	FALSE	36830	207	0.331	15	71	452.79	32148	0.87	63	538.095	33900	0.920445
AFVG_250M421	250	2cc876f9-6e5b-48cb-8ff7-a6751e2d23c6	16_4	FALSE	40131	467	0.445	18	58	624.16	36201	0.9	56	650.571	36432	0.907827
AFVG_250M422	250	003550be-5486-48c6-8b7a-6f6ded8ad4d5	16_5	FALSE	40121	458	0.445	100	52	727.33	37821	0.94	50	757.08	37854	0.943496
AFVG_250M423	250	ed8864a8-7388-4844-b96a-9c96cea507c5	16_6	FALSE	40127	471	0.444	43	51	732.82	37374	0.93	49	767.265	37596	0.936925
AFVG_250M424	250	9554aa81-1fba-41f8-8b12-178b2c025ee8	1700_3	FALSE	55991	213	0.589	23	96	516.78	49611	0.89	88	579.648	51009	0.911021
AFVG_250M425	250	2eeb0b9d-2b5b-4ec0-bf0e-a220ab19ba35	1700_4	FALSE	55775	205	0.589	84	80	625.09	50007	0.9	73	699.575	51069	0.915625
AFVG_250M426	250	a22b2359-96fd-4108-a8cb-c53979e6d802	1704_1	FALSE	38640	192	0.498	10	69	418.09	28848	0.75	61	557.705	34020	0.880435
AFVG_250M427	250	0dff9743-252a-44d5-a291-cbb0c951f0d9	1705_1	FALSE	37449	337	0.515	24	64	547.78	35058	0.94	55	641.564	35286	0.942241
AFVG_250M428	250	3fbbec92-13af-4143-b498-c426e0a2c147	1706_2	FALSE	37712	264	0.505	15	49	683.94	33513	0.89	47	717.511	33723	0.894225
AFVG_250M429	250	e415c7bc-8e0d-4c4a-a1b2-a720ae6429da	1707_1	FALSE	36895	285	0.376	14	70	439.97	30798	0.83	60	538.95	32337	0.87646
AFVG_250M430	250	6b3abd30-bb13-42f5-a6ab-c86aa21237bb	1708_4	FALSE	37385	331	0.522	37	55	628.36	34560	0.92	52	687.577	35754	0.956373
AFVG_250M431	250	e775668a-e444-45f7-9f14-59f0eefd27cf	1709_2	FALSE	55859	661	0.318	10	95	523.11	49695	0.89	82	633.622	51957	0.930146
AFVG_250M432	250	f752b08c-4798-43fa-9137-968ca5e1f50e	170_1	FALSE	36932	315	0.459	21	51	618.82	31560	0.85	53	617.604	32733	0.886305
AFVG_250M433	250	6b49a30e-0d62-4c80-9955-8da451a62e50	170_2	FALSE	37411	318	0.46	45	43	783.49	33690	0.9	43	802.256	34497	0.922108
AFVG_250M434	250	1ae99b42-ab3f-4815-bd88-d3162b23bc3f	1716_1	FALSE	37917	129	0.372	54	57	626.11	35688	0.94	55	656.836	36126	0.952765
AFVG_250M435	250	dbf8f12a-ecc5-45a5-90ef-50c724264a72	1717_1	FALSE	42888	207	0.349	34	69	561.61	38751	0.9	57	704.789	40173	0.936696
AFVG_250M436	250	bd0f9ed5-052b-4f2a-ae34-1e2b45fd5fe1	171_5	FALSE	39213	297	0.587	54	60	581.7	34902	0.89	55	647.782	35628	0.908576
AFVG_250M437	250	02604626-6a47-4429-93ab-b5543f373068	171_6	FALSE	38736	300	0.588	82	61	550.87	33603	0.87	58	590.638	34257	0.884371
AFVG_250M438	250	6980bbf2-72e0-4288-9330-9e4b02918e29	171_7	FALSE	38689	288	0.587	37	68	503.51	34239	0.88	66	534.045	35247	0.911034
AFVG_250M439	250	01c19cd3-1ca0-4a43-8e28-7dd87369fc89	1722_3	FALSE	59678	197	0.328	16	116	436.84	50673	0.85	95	586.2	55689	0.933158
AFVG_250M440	250	c817b9fb-a4ba-430b-a4af-c61aa55d1ae5	1725_4	TRUE	35434	1400	0.316	31	73	435.37	31782	0.9	70	485.529	33987	0.959164
AFVG_250M441	250	9614e77f-f367-4bd4-b86b-eff72d76a1f9	1730_1	FALSE	61407	225	0.391	14	94	593.01	55743	0.91	81	713.111	57762	0.940642
AFVG_250M442	250	efb175bf-ca8a-4f65-81f5-7240e17d62ea	1731_2	FALSE	37340	278	0.556	11	52	621.75	32331	0.87	50	679.02	33951	0.909239
AFVG_250M443	250	46003b62-1f49-4808-b83a-1f4bbe197e85	1738_1	FALSE	55116	157	0.326	15	94	536.49	50430	0.91	81	651.148	52743	0.956945
AFVG_250M444	250	74311ccc-f3d6-4fa3-b0a6-293a3189d7b5	1739_3	FALSE	55735	149	0.328	12	93	525.39	48861	0.88	82	641.707	52620	0.944111
AFVG_250M445	250	454f3d5e-ab93-435a-8253-410b791b65bb	173_1	FALSE	44146	316	0.418	14	83	416.78	34593	0.78	64	631.406	40410	0.915372
AFVG_250M446	250	59af12cc-d876-4299-9e0d-044064f8ff0d	1742_2	FALSE	36082	147	0.376	13	53	611.94	32433	0.9	49	681.612	33399	0.925642
AFVG_250M447	250	7da1dd11-4d5b-4b62-bb88-bed05dff64ac	1750_1	FALSE	38757	232	0.513	16	65	494.03	32112	0.83	61	560.852	34212	0.882731
AFVG_250M448	250	512f2893-336a-48f5-88f1-7dff2965d935	1753_1	FALSE	43502	144	0.429	45	49	845.02	41406	0.95	44	944.045	41538	0.954853
AFVG_250M449	250	8b181ebf-acec-4264-b18e-c8465c1c2e92	1755_2	FALSE	41219	246	0.312	18	80	450.82	36066	0.87	72	534.375	38475	0.933429
AFVG_250M450	250	1c59771c-0d12-4699-9d64-90d32b023e9f	175_1	FALSE	38503	236	0.495	18	61	514.92	31410	0.82	57	559.421	31887	0.828169
AFVG_250M451	250	bb35c548-24e8-4411-8c1a-9378cbe158e4	1762_1	FALSE	38757	661	0.503	24	64	526.27	33681	0.87	58	602.224	34929	0.901231
AFVG_250M452	250	52657bf9-07ea-4676-b66f-c318f6921b22	1763_3	FALSE	36504	390	0.512	35	54	612.22	33060	0.91	50	657.6	32880	0.900723
AFVG_250M453	250	757075e2-1f32-42b8-b65f-644dac540306	1766_1	FALSE	53236	249	0.405	10	85	510.11	43359	0.81	71	680.831	48339	0.908013
AFVG_250M454	250	9545699a-c4cb-439a-9f66-52d1bae9c1d8	1768_1	FALSE	51672	560	0.325	61	57	854.58	48711	0.94	57	857.368	48870	0.945773
AFVG_250M455	250	2a98075d-b2f7-4b8c-b30c-59d04dc6fac5	1768_5	FALSE	51660	552	0.326	11	83	565.95	46974	0.91	75	638.92	47919	0.927584
AFVG_250M456	250	e43713d2-9f1f-4f71-96fe-64e5b35b686d	1768_6	FALSE	52076	559	0.325	26	63	767.1	48327	0.93	62	781.452	48450	0.930371
AFVG_250M457	250	6990bd38-1b2f-4036-9341-80b613041b3d	1774_2	FALSE	37101	220	0.322	15	75	431.2	32340	0.87	64	524.297	33555	0.904423
AFVG_250M458	250	7e779c0d-0db0-419c-8d20-379179b3728a	177_3	FALSE	39018	243	0.435	26	53	652.92	34605	0.89	48	743.812	35703	0.915039
AFVG_250M459	250	e397c0f2-34b3-42f2-80b9-71d2d10b8543	1781_1	FALSE	35794	411	0.379	15	60	506.4	30384	0.85	55	566.073	31134	0.869811
AFVG_250M460	250	57897b5d-f6f6-4cb4-b0b5-b24a782dd4eb	1782_1	FALSE	35516	184	0.361	22	64	499.55	31971	0.9	55	596.073	32784	0.923077
AFVG_250M461	250	d22d8b5d-c9c4-482e-83ba-436c41902a2a	1783_2	FALSE	43961	929	0.508	16	58	706.81	40995	0.93	55	761.564	41886	0.952799
AFVG_250M462	250	a679d0a1-b8e7-42f5-9330-54950fb270fb	1786_1	FALSE	39374	226	0.335	13	70	486.43	34050	0.86	53	689.038	36519	0.92749
AFVG_250M463	250	42d4957c-3e89-4d1f-a817-60092b371613	1788_1	TRUE	71205	4703	0.372	10	136	437.82	59544	0.84	111	580.892	64479	0.90554
AFVG_250M464	250	c4874691-193f-4a75-b22e-6cdd8ba1aa03	178_1	FALSE	35333	84	0.417	30	50	642.54	32127	0.91	49	672.673	32961	0.932867
AFVG_250M465	250	432dc697-4cf8-4462-9716-6f5df8a578f0	1792_1	FALSE	38787	293	0.398	11	61	568.72	34692	0.89	52	679.385	35328	0.910821
AFVG_250M466	250	54a95d5d-32bd-4348-9693-bd0a8db2e1eb	1793_2	FALSE	38628	291	0.397	17	56	608.3	34065	0.88	54	648.667	35028	0.906803
AFVG_250M467	250	7e0c47c5-3912-4e54-864a-57a86d665d7c	1793_3	FALSE	38455	299	0.399	51	45	787.6	35442	0.92	45	793.067	35688	0.928046
AFVG_250M468	250	ab787fac-b15c-4b2b-b86b-a652a733606c	1797_1	FALSE	54188	452	0.381	11	92	535.47	49263	0.91	69	750.13	51759	0.955175
AFVG_250M469	250	35f03bdd-4a55-48db-a107-83b97826ba4a	1798_1	FALSE	55128	374	0.384	10	91	502.62	45738	0.83	79	638.43	50436	0.914889
AFVG_250M470	250	1de21a03-2799-476c-9198-d1b7478682b1	17_2	FALSE	39216	352	0.433	68	57	641.42	36561	0.93	52	705.635	36693	0.935664
AFVG_250M471	250	9cb0555a-d067-4336-b42b-0b819e818519	1803_1	FALSE	42230	396	0.581	13	81	468.93	37983	0.9	68	587.029	39918	0.945252
AFVG_250M472	250	fab97665-2ee0-4d54-bbb0-d30cc5d3616f	1806_1	FALSE	45113	199	0.45	28	56	760.23	42573	0.94	52	843.346	43854	0.972092
AFVG_250M473	250	c969e894-9610-4d0c-b9e3-fd65df9f52f2	1807_1	FALSE	52392	37	0.466	21	77	617.45	47544	0.91	59	827.593	48828	0.931974
AFVG_250M474	250	83a457f8-4aab-493d-bec4-0e1fab8ebdcf	1809_3	FALSE	36992	140	0.344	49	51	654.59	33384	0.9	50	677.52	33876	0.915766
AFVG_250M475	250	7edf4744-8ccf-4af9-a20e-56c30791d02e	1810_1	FALSE	38440	124	0.367	14	65	528.83	34374	0.89	57	603.947	34425	0.895552
AFVG_250M476	250	397b2bf7-d423-42ab-b9eb-e158a91ce945	1811_2	FALSE	38103	124	0.365	11	60	572.05	34323	0.9	58	599.379	34764	0.912369
AFVG_250M477	250	073a9ec5-ed57-428f-b51b-824ca0994474	1816_1	FALSE	35297	194	0.51	10	61	464.61	28341	0.8	61	471.197	28743	0.814318
AFVG_250M478	250	de5fca0e-d934-4733-8ecc-4af3d278f420	1817_1	FALSE	39283	144	0.467	40	40	858.15	34326	0.87	38	937.184	35613	0.906575
AFVG_250M479	250	400e94cd-8894-4679-9ad7-cba5c150861b	1819_3	TRUE	71295	1578	0.356	31	123	500.66	61581	0.86	114	559.974	63837	0.895392
AFVG_250M480	250	bd71cf34-b45e-4c33-85d6-cbf70c6c4c2c	181_1	TRUE	40398	2290	0.393	81	47	765.51	35979	0.89	47	779.043	36615	0.906357
AFVG_250M481	250	ff9f2402-ecc4-4755-bc12-7be738ef5472	181_2	TRUE	40632	2536	0.394	44	50	733.56	36678	0.9	49	756.673	37077	0.912507
AFVG_250M482	250	0ab8a344-f66b-4294-a68b-71d17f505025	181_3	TRUE	40530	2423	0.394	53	54	670.39	36201	0.89	54	682.056	36831	0.908734
AFVG_250M483	250	8d308a74-88f4-42fd-9983-f317194053b2	181_4	TRUE	40445	2347	0.394	37	52	701.71	36489	0.9	51	723.294	36888	0.912053
AFVG_250M484	250	289ba255-9e3f-4eb8-82a8-d397993022a5	181_5	TRUE	39929	1831	0.393	19	57	630.63	35946	0.9	56	649.018	36345	0.910241
AFVG_250M485	250	a9905600-dd84-4dcb-8518-58cce758244a	181_6	TRUE	40463	2364	0.393	29	53	685.92	36354	0.9	52	706.788	36753	0.908311
AFVG_250M486	250	3a5bd9ee-3b0c-44f6-8f4e-b56a8efb55c2	181_7	TRUE	40906	2802	0.396	10	62	534.29	33126	0.81	63	529.19	33339	0.815015
AFVG_250M487	250	b2b4cfbd-80a9-4b88-98f8-a19217e59403	181_8	TRUE	40430	2329	0.393	20	59	598.53	35313	0.87	59	609.305	35949	0.889166
AFVG_250M488	250	4ffd53a0-749b-40e1-894f-5d1718d1d4e4	1823_1	FALSE	40483	193	0.334	12	72	493.79	35553	0.88	51	764.765	39003	0.963441
AFVG_250M489	250	54ecc1a9-7a6d-4d7f-b2e5-f2b5839b7af8	1824_2	FALSE	36494	158	0.318	14	72	444.17	31980	0.88	69	491.13	33888	0.928591
AFVG_250M490	250	64af9f84-c2a4-4437-9d37-1fcae7bf1a40	1829_4	FALSE	41922	296	0.343	45	76	500.72	38055	0.91	77	501.351	38604	0.920853
AFVG_250M491	250	fc82d8e2-999f-4add-9ce5-213c751a3ed8	1829_5	FALSE	41925	290	0.342	25	78	477.62	37254	0.89	79	483.57	38202	0.911199
AFVG_250M492	250	509c08dc-b537-4668-8e52-67e4a2ee3919	1830_2	FALSE	40826	289	0.345	15	83	440.24	36540	0.89	82	447.439	36690	0.898692
AFVG_250M493	250	b279dccd-8d25-463d-9b87-dea8c542078b	1836_2	FALSE	38490	216	0.321	21	74	464.51	34374	0.89	67	532.075	35649	0.926189
AFVG_250M494	250	4734da81-9355-44a9-952f-ced654079947	1839_1	FALSE	69695	631	0.31	22	102	632.85	64551	0.93	97	694.144	67332	0.966095
AFVG_250M495	250	c6d27a43-9541-4a15-87dc-b640d4741859	1846_1	FALSE	39688	234	0.326	13	85	396.78	33726	0.85	71	517.056	36711	0.92499
AFVG_250M496	250	6b40ec29-9a08-4017-8380-c5b107ce945c	1849_1	FALSE	35605	280	0.558	18	73	421.19	30747	0.86	68	472.853	32154	0.903075
AFVG_250M497	250	183b0756-3e16-4179-8bc6-be28e2261eda	1850_1	FALSE	39020	279	0.555	24	63	491.76	30981	0.79	55	609.382	33516	0.858944
AFVG_250M498	250	ec3ab32c-8c46-495e-8904-8192ad7d62ab	1850_4	FALSE	38741	279	0.555	38	76	447.16	33984	0.88	60	541.8	32508	0.839111
AFVG_250M499	250	9e2d55e8-4c56-491a-8139-c40aca9a26ad	1852_5	FALSE	50180	293	0.383	38	72	626.04	45075	0.9	66	696.909	45996	0.91662
AFVG_250M500	250	9131d2f8-872d-4c7d-b9f3-b5c81631b687	1855_1	FALSE	49979	577	0.35	13	80	558.08	44646	0.89	61	769.328	46929	0.938974
AFVG_250M501	250	9a9289e5-1a19-4fa0-8b68-eb130e732abe	1862_10	FALSE	35930	125	0.326	42	69	456.17	31476	0.87	67	474.09	31764	0.884052
AFVG_250M502	250	1a45d897-6892-4abf-ad32-e3263a68661e	1862_6	FALSE	36273	134	0.325	60	67	472.52	31659	0.87	65	503.077	32700	0.901497
AFVG_250M503	250	5ef7e311-0de0-4e70-ac49-9a451bd67030	1862_7	FALSE	36486	134	0.325	47	63	519	32697	0.9	62	529.887	32853	0.900428
AFVG_250M504	250	2ee3e0ed-a888-4407-90ba-f63d6c1dc2ed	1862_8	FALSE	36191	134	0.326	43	59	550.93	32505	0.9	60	548.95	32937	0.910088
AFVG_250M505	250	41cfe571-3f82-4b43-b6d9-a527fa8765ca	1862_9	FALSE	36312	125	0.326	51	64	509.58	32613	0.9	63	525.619	33114	0.91193
AFVG_250M506	250	010aaf12-9165-477a-9422-c7611e89732f	1864_2	FALSE	71249	4434	0.354	14	127	492.45	62541	0.88	114	566.816	64617	0.906918
AFVG_250M507	250	c2d02c2b-0330-4402-b4b1-920c51d247d6	1865_1	FALSE	46386	203	0.5	12	84	431.54	36249	0.78	85	451.553	38382	0.827448
AFVG_250M508	250	6e7109a7-c20b-415d-8b32-8d229814314b	1866_1	FALSE	37216	191	0.358	95	85	348.21	29598	0.79	67	501.179	33579	0.902273
AFVG_250M509	250	be3fa093-68b0-4af4-814b-dcfcf3459bb3	186_2	FALSE	41711	469	0.386	14	81	424.41	34377	0.82	68	546.176	37140	0.890413
AFVG_250M510	250	8a36a9ea-5b46-4552-9455-350e6db5d79d	1872_1	FALSE	39952	239	0.425	14	74	488.55	36153	0.9	72	505.125	36369	0.910317
AFVG_250M511	250	bb67a6cd-b54e-4093-a5ed-5d3268faa810	1876_1	FALSE	51913	307	0.335	10	106	434.63	46071	0.89	73	688.027	50226	0.967503
AFVG_250M512	250	7d4add8d-c101-42ba-b6bb-978b96f21c14	1881_1	FALSE	35683	487	0.365	13	47	682.66	32085	0.9	45	722.533	32514	0.91119
AFVG_250M513	250	09bec22d-6559-4685-87ed-2dd658014def	1883_1	FALSE	37924	219	0.359	44	84	363.46	30531	0.8	66	506.455	33426	0.881394
AFVG_250M514	250	3f532bb7-c464-4da6-950c-bc19b5c02fb3	1886_1	FALSE	42376	140	0.407	10	73	435.58	31797	0.75	53	690.283	36585	0.863342
AFVG_250M515	250	f01ef9d2-745d-4432-b1f0-a7374509dfae	1892_2	TRUE	29993	906	0.319	29	55	524.35	28839	0.96	52	558.115	29022	0.967626
AFVG_250M516	250	b35454bb-b940-40b7-ac19-a9cfc7918dbd	1896_1	FALSE	38610	1232	0.382	12	62	460.35	28542	0.74	57	561.421	32001	0.828827
AFVG_250M517	250	40be7d50-cd87-4336-804f-de7b51a2c7d7	189_1	FALSE	38522	321	0.407	29	57	618.63	35262	0.92	56	641.464	35922	0.932506
AFVG_250M518	250	4ba871a2-e216-4da2-b40c-b8ca72ddb1ad	18_11	FALSE	38409	196	0.462	32	56	648.11	36294	0.94	56	648.107	36294	0.944935
AFVG_250M519	250	9f1d3163-9e78-4863-9eb5-8918b0be6811	18_15	FALSE	38460	189	0.46	13	64	556.92	35643	0.93	64	558.047	35715	0.928627
AFVG_250M520	250	c4c7b335-483c-4028-a6dd-57ef65d17364	18_16	FALSE	38415	196	0.459	22	63	564.19	35544	0.92	63	564.19	35544	0.925264
AFVG_250M521	250	73e0b5b6-a421-4734-9e29-04ff20065f5c	18_17	FALSE	38651	197	0.461	10	66	523.55	34554	0.89	66	520.091	34326	0.888101
AFVG_250M522	250	d7c5a3b5-ba30-486f-849c-79bb55805f06	18_22	FALSE	38621	198	0.46	15	66	543.32	35859	0.93	65	551.077	35820	0.927475
AFVG_250M523	250	9ecc401c-b50b-4101-a72c-7ebdd2f2769f	18_24	FALSE	38720	196	0.461	157	60	601.55	36093	0.93	59	613.475	36195	0.934788
AFVG_250M524	250	f8abaef3-04b9-439b-9825-28c5736afe2e	18_26	FALSE	38793	190	0.46	28	60	613.4	36804	0.95	60	615.3	36918	0.951667
AFVG_250M525	250	b42ce470-5af2-4972-a17d-893c5792ddfe	18_7	FALSE	38440	190	0.462	45	58	623.33	36153	0.94	59	614.898	36279	0.943783
AFVG_250M526	250	e22356dd-9b10-470d-a319-b79184b0c889	1906_1	FALSE	56559	399	0.315	11	130	351.42	45684	0.81	75	713.64	53523	0.946322
AFVG_250M527	250	b5965db8-c4df-442a-b45a-3480ccdf3806	1909_1	FALSE	55624	220	0.375	19	96	540.44	51882	0.93	82	645.915	52965	0.952197
AFVG_250M528	250	21181dcb-ce03-4d9c-978b-163cec1e9307	1920_1	FALSE	69317	2187	0.367	14	123	501.66	61704	0.89	114	557.105	63510	0.916225
AFVG_250M529	250	2ea6a6a7-5c9d-42a9-8d16-8f18c1b7e05c	192_1	FALSE	39731	297	0.415	16	66	536.27	35394	0.89	57	636.263	36267	0.912814
AFVG_250M530	250	d2a731a9-0094-4c46-83e2-81fce4ba7b73	1933_1	FALSE	33866	139	0.313	37	58	534.1	30978	0.91	56	564.429	31608	0.933325
AFVG_250M531	250	a3f8e56f-e7d8-4c63-9767-192f97dd6f59	1938_2	FALSE	62853	414	0.41	13	96	562.5	54000	0.86	76	760.974	57834	0.920147
AFVG_250M532	250	6322a812-e4b3-461a-a51b-5b158d8f7550	1939_1	FALSE	48417	216	0.326	52	74	616.18	45597	0.94	69	673.652	46482	0.960035
AFVG_250M533	250	72148498-402a-4f4f-86b0-1fe863141936	193_4	FALSE	40450	394	0.441	32	63	562.29	35424	0.88	55	666.982	36684	0.906897
AFVG_250M534	250	979c7304-fdf5-4caf-93f9-59278c1428b5	193_6	FALSE	40225	403	0.44	35	61	571.18	34842	0.87	56	654.054	36627	0.910553
AFVG_250M535	250	9c8081e3-dfef-4cda-b568-1fb177ca3dac	1940_1	FALSE	38372	156	0.37	20	70	475.24	33267	0.87	54	663.222	35814	0.933337
AFVG_250M536	250	e3d86b5a-11a4-46a4-adf3-890b559484ed	1941_2	FALSE	34857	177	0.49	42	77	376.48	28989	0.83	54	603.778	32604	0.935364
AFVG_250M537	250	dc16b43e-464e-41ab-9b3c-0d219887343e	194_1	FALSE	41470	393	0.45	18	75	441.8	33135	0.8	57	672.789	38349	0.924741
AFVG_250M538	250	90c4d886-11c8-4a7b-99dd-b067f3975617	1954_1	FALSE	64929	444	0.309	11	114	482.16	54966	0.85	85	713.259	60627	0.933743
AFVG_250M539	250	6ab51ba7-c900-4731-af56-4229acc5e447	1958_1	FALSE	70578	4829	0.373	18	125	493.37	61671	0.87	105	619.2	65016	0.921194
AFVG_250M540	250	633e7592-28f8-4054-ba4e-4f31228eac8d	1959_1	TRUE	72950	3761	0.373	12	132	469.84	62019	0.85	105	648.8	68124	0.933845
AFVG_250M541	250	3de0245f-3d2c-406d-8ee9-aa7ab510b89b	195_1	FALSE	40848	2100	0.407	110	64	591.84	37878	0.93	57	666	37962	0.929348
AFVG_250M542	250	f0a8ef3a-9613-4dd9-9e82-b6cc4e1dfe37	1963_1	FALSE	57066	175	0.39	21	101	491.88	49680	0.87	78	688.769	53724	0.941436
AFVG_250M543	250	6f3a5258-3bdb-4c2b-b381-41a030a040d6	1965_2	FALSE	56110	425	0.504	17	77	652.71	50259	0.9	56	929.839	52071	0.928016
AFVG_250M544	250	9e7ad9ac-a35e-4d6b-8c9b-c41095377b9e	196_1	FALSE	38898	160	0.426	111	44	829.84	36513	0.94	45	821.867	36984	0.950794
AFVG_250M545	250	88a6e748-ab93-48fc-ba17-f52b4a5deedc	1974_2	FALSE	36921	119	0.409	19	67	462.9	31014	0.84	46	744.261	34236	0.927277
AFVG_250M546	250	2883dfdf-8da8-43d0-aedd-037cfb7de7a2	197_1	FALSE	40102	307	0.447	10	72	488.42	35166	0.88	69	521.174	35961	0.896738
AFVG_250M547	250	ef36f5c6-1ee5-4ce4-8a2b-b896d464b862	1983_2	FALSE	36425	157	0.324	27	64	522.38	33432	0.92	56	603.321	33786	0.92755
AFVG_250M548	250	eee757ac-e45f-4a55-9f35-00de07bc923c	1985_1	FALSE	32067	175	0.326	54	54	535.39	28911	0.9	48	617	29616	0.923566
AFVG_250M549	250	222ffb9e-b542-4412-b7c8-5e9e25462ba4	1986_1	FALSE	34006	160	0.312	19	68	446.82	30384	0.89	60	517.3	31038	0.912721
AFVG_250M550	250	a266d6aa-8847-45da-a626-382f0403e867	1991_2	FALSE	30422	158	0.365	21	56	481.77	26979	0.89	48	590.062	28323	0.931004
AFVG_250M551	250	fe3dab9a-634d-4489-8b69-15ce5f3ca8de	1992_1	FALSE	34943	148	0.309	60	59	547.73	32316	0.92	58	564	32712	0.936153
AFVG_250M552	250	12b586ed-10fd-426b-a743-a49c3bb20fd1	19_1	FALSE	40456	350	0.477	42	58	612.62	35532	0.88	48	775.438	37221	0.920037
AFVG_250M553	250	a3338a84-5f0f-42d5-b8e8-4d23ab4bd62d	1_6	FALSE	39304	399	0.454	57	67	489.54	32799	0.83	55	631.2	34716	0.883269
AFVG_250M554	250	75d28a21-0a6b-45ab-a665-1a0cd3a5de4e	1_7	FALSE	39006	455	0.454	22	64	464.16	29706	0.76	57	589.211	33585	0.861021
AFVG_250M555	250	b382e648-71c1-423f-8657-77c59e534319	1_8	FALSE	39455	418	0.454	46	58	567.93	32940	0.83	49	724.959	35523	0.900342
AFVG_250M556	250	a11006b7-a0ae-46d2-975a-c89f02a9f092	2000_3	FALSE	35621	419	0.527	15	50	624.36	31218	0.88	48	659.938	31677	0.889279
AFVG_250M557	250	38616f52-af00-4b11-a723-0a73b86376bf	2006_2	FALSE	46915	323	0.332	13	88	496.84	43722	0.93	73	616.315	44991	0.95899
AFVG_250M558	250	00640310-7711-4c69-b874-6ae951c7fa12	2008_1	FALSE	37876	190	0.485	15	63	518.71	32679	0.86	52	656.885	34158	0.901838
AFVG_250M559	250	5efb619f-fd7c-4587-958f-ac50171a4b04	2009_2	FALSE	33355	330	0.479	43	50	592.02	29601	0.89	46	651.13	29952	0.897976
AFVG_250M560	250	c23403ff-2204-4455-9d9a-da52a134ea52	200_1	TRUE	38906	1778	0.47	10	92	300.36	27633	0.71	59	604.322	35655	0.91644
AFVG_250M561	250	1ceb271e-f7d9-4b8b-9f48-a345e89e75cd	2013_2	FALSE	46418	454	0.338	13	76	546.47	41532	0.89	58	743.793	43140	0.929381
AFVG_250M562	250	05035bf9-4a11-4f91-925c-dc440d46df28	2017_3	TRUE	28690	1520	0.381	37	59	455.03	26847	0.94	56	486.429	27240	0.94946
AFVG_250M563	250	9e6109fd-86ed-43b0-a622-5c831fd4dffe	201_2	FALSE	38494	146	0.433	24	53	686.43	36381	0.94	50	729.3	36465	0.94729
AFVG_250M564	250	7cea11dd-86ae-406e-847f-588a7d65c69f	2020_1	FALSE	39613	350	0.463	12	63	537.24	33846	0.85	49	739.959	36258	0.915306
AFVG_250M565	250	2204a73b-bda8-400b-9329-3e479c498959	2029_1	FALSE	36254	188	0.316	22	72	451.88	32535	0.9	68	494.868	33651	0.928201
AFVG_250M566	250	82c5e825-c985-4c0c-a141-ae01ea83582c	202_3	FALSE	36674	123	0.442	88	52	663.87	34521	0.94	53	655.302	34731	0.94702
AFVG_250M567	250	0d2633e5-af15-40ce-b387-2da06850b316	2031_1	FALSE	59363	136	0.48	12	103	503.33	51843	0.87	73	751.192	54837	0.923757
AFVG_250M568	250	192135fc-ca9d-441c-b8b2-bb2021221d90	2035_1	FALSE	51068	554	0.329	14	69	646.78	44628	0.87	56	846.482	47403	0.928233
AFVG_250M569	250	68168e09-3e4a-4ef3-8be6-0a9ab13d5cb0	2036_1	FALSE	47994	331	0.322	10	107	348.98	37341	0.78	81	548.741	44448	0.926116
AFVG_250M570	250	1941d967-8ffa-4a53-8108-cbeb7f821013	203_2	FALSE	59226	195	0.525	33	74	748.82	55413	0.94	64	877.125	56136	0.947827
AFVG_250M571	250	22462a51-706f-4fac-8810-81006c6a0e50	204_1	FALSE	53750	424	0.342	37	75	675.68	50676	0.94	72	706.333	50856	0.946158
AFVG_250M572	250	e3180301-93f6-4237-a0fe-b7fdf90c0f7e	204_2	FALSE	52978	438	0.343	22	85	579.14	49227	0.93	79	634.063	50091	0.945506
AFVG_250M573	250	d3f5ce78-7084-4277-a65e-8e1e153cd563	2051_1	FALSE	46715	430	0.346	17	90	482.77	43449	0.93	75	589.48	44211	0.946398
AFVG_250M574	250	fb3d965c-3cb1-40fc-8ed0-9898e73f743a	2057_1	FALSE	58917	185	0.358	17	97	565.39	54843	0.93	83	681.434	56559	0.959978
AFVG_250M575	250	c99aeb73-2eab-4fff-8558-fc9087809b94	2060_1	FALSE	36276	168	0.313	16	68	474.75	32283	0.89	63	520.095	32766	0.903242
AFVG_250M576	250	a54ed4c3-45de-47fa-8e40-3bff44e4e2e8	2076_2	FALSE	60347	1775	0.443	14	100	536.85	53685	0.89	84	663.857	55764	0.924056
AFVG_250M577	250	f17ae86d-8648-4677-9435-7548b5928f32	2081_1	FALSE	50147	630	0.334	15	79	571.86	45177	0.9	67	719.687	48219	0.961553
AFVG_250M578	250	115e53c6-d2e9-4241-a38f-9b794bbfe7e6	2084_1	FALSE	53332	420	0.326	15	86	554.44	47682	0.89	61	834.443	50901	0.954418
AFVG_250M579	250	4b9c8393-9887-49ec-b697-9ec75312f1ca	2086_1	FALSE	35040	130	0.321	39	61	543.15	33132	0.94	55	602.836	33156	0.946233
AFVG_250M580	250	e05a1acd-5852-44e6-91a9-d748195c12c5	2090_1	FALSE	38870	144	0.322	26	77	422.69	32547	0.84	58	617.638	35823	0.92161
AFVG_250M581	250	9b7e3d00-3db9-4115-8d43-b0933ee16b05	2094_3	FALSE	36327	166	0.368	19	63	525.57	33111	0.91	51	669.529	34146	0.939962
AFVG_250M582	250	6fd58bfb-9865-420c-bfd6-ef74ba847f5d	2096_2	FALSE	62330	245	0.537	10	113	471.45	53274	0.86	76	775.026	58902	0.945002
AFVG_250M583	250	371862f5-4c26-4504-a6c2-7e4d8c64e5d6	2098_1	FALSE	56606	242	0.372	30	67	789.27	52881	0.93	60	883.8	53028	0.936791
AFVG_250M584	250	f1515681-f6b8-42b8-a928-206e66acfdea	209_1	FALSE	55466	254	0.336	23	78	641.04	50001	0.9	70	744.686	52128	0.939819
AFVG_250M585	250	2c8b1b13-aa80-41fa-bf7b-b41060bb4973	20_2	FALSE	41638	728	0.419	41	66	577.09	38088	0.91	41	969.659	39756	0.954801
AFVG_250M586	250	9ba31de7-e21e-4838-8bab-2f12ba421b1b	210_2	FALSE	41894	277	0.524	13	77	450.7	34704	0.83	60	567.65	34059	0.81298
AFVG_250M587	250	550cd999-fc46-40be-b1ce-dac120b3fa8c	2110_1	FALSE	34363	609	0.331	17	58	550.97	31956	0.93	48	685.5	32904	0.957542
AFVG_250M588	250	4cd8d5db-0baf-43f4-b448-39aa1682dbd9	2114_1	FALSE	51551	194	0.334	20	93	503.97	46869	0.91	70	704.657	49326	0.956839
AFVG_250M589	250	79676a3b-669c-4ce5-af22-95a348643951	2119_4	FALSE	51227	220	0.331	14	117	387.64	45354	0.88	81	610	49410	0.96453
AFVG_250M590	250	6c5975ea-8c07-4780-acc6-ee1b14b88599	2121_1	FALSE	57214	563	0.335	13	89	565.92	50367	0.88	69	768.652	53037	0.926993
AFVG_250M591	250	50bf7b59-f8d3-4d5f-9dfe-e8c54c73d5d3	2126_1	FALSE	48922	191	0.344	11	102	395.32	40323	0.82	78	591.038	46101	0.942337
AFVG_250M592	250	a6a9dd7a-17de-419f-9e45-f5726db5db5f	2128_1	FALSE	55134	188	0.501	10	93	516.26	48012	0.87	63	832.429	52443	0.951192
AFVG_250M593	250	bf0477de-4d27-4f04-8f52-da775a5bd567	2129_1	FALSE	61356	289	0.487	24	86	621.31	53433	0.87	74	747.73	55332	0.901819
AFVG_250M594	250	e61be1e0-3d13-4908-834d-3e40db437067	2143_1	FALSE	60410	293	0.449	58	80	704.06	56325	0.93	77	747.468	57555	0.95274
AFVG_250M595	250	24a7bf0a-d3a0-48df-a0da-091e65cb33ca	2145_3	FALSE	36134	356	0.45	19	57	564.47	32175	0.89	58	572.897	33228	0.919577
AFVG_250M596	250	c9a8ab62-9cae-4195-956c-c04f7ce99799	2148_1	FALSE	38317	147	0.349	15	89	352.89	31407	0.82	74	484.905	35883	0.936477
AFVG_250M597	250	ba7fa698-2675-4f3c-87bc-bd1e95b92d4a	214_1	FALSE	36463	323	0.497	40	50	669.36	33468	0.92	45	760.667	34230	0.93876
AFVG_250M598	250	f983aeac-7ae6-4c05-af68-a6d6779cae0e	2150_2	FALSE	64712	385	0.452	12	96	595.97	57213	0.88	68	899.691	61179	0.945404
AFVG_250M599	250	64cba28e-2bf2-4288-b1f4-c9274d0408bc	2151_2	FALSE	62330	210	0.532	11	90	584.33	52590	0.84	68	880.015	59841	0.960067
AFVG_250M600	250	583a9a4b-c982-466c-a2ac-0578659e797e	2157_1	FALSE	39206	201	0.333	22	72	482.42	34734	0.89	62	588.339	36477	0.930393
AFVG_250M601	250	5ac8e654-319d-4466-8680-941466b2670f	2164_2	FALSE	57879	525	0.327	15	91	575.27	52350	0.9	70	780.986	54669	0.944539
AFVG_250M602	250	4eacb2de-7ea9-4d6a-a15b-c1e16d8fc036	2166_1	FALSE	38193	146	0.346	20	70	488.7	34209	0.9	58	618.828	35892	0.939753
AFVG_250M603	250	d1024485-1264-4a5e-99eb-f2a4ce80c51c	2167_4	FALSE	35706	163	0.327	30	69	475.35	32799	0.92	58	588.362	34125	0.955722
AFVG_250M604	250	a79b8723-161c-4243-9d10-01b756a94292	2171_1	FALSE	54516	264	0.36	10	106	417.17	44220	0.81	86	564.314	48531	0.890216
AFVG_250M605	250	39f5787c-480e-434a-a88c-74caf9764ab0	2175_4	FALSE	34209	70	0.331	24	69	437.61	30195	0.88	61	523.033	31905	0.932649
AFVG_250M606	250	b82faf39-8ef4-4c01-925c-b7af9bbf2840	217_3	FALSE	45948	231	0.372	32	63	688.29	43362	0.94	61	717.738	43782	0.95286
AFVG_250M607	250	9a75ca46-2a4e-43e3-a28b-ebaa75f5236f	218_1	FALSE	43191	365	0.417	12	71	513.08	36429	0.84	58	703.707	40815	0.944989
AFVG_250M608	250	9242d991-2971-4479-bf69-2cceb3039f28	2198_2	FALSE	33098	138	0.329	51	62	505.74	31356	0.95	61	511.23	31185	0.942202
AFVG_250M609	250	e0fa1166-9c51-46cc-b9f7-18a2e152ba74	21_3	TRUE	39169	1595	0.425	45	54	639.33	34524	0.88	52	697.904	36291	0.926524
AFVG_250M610	250	9022d216-3887-4809-8ba6-fe5575b08ce6	2200_2	FALSE	31347	205	0.387	24	49	568.22	27843	0.89	48	595.625	28590	0.912049
AFVG_250M611	250	093cd1fa-6702-4f0c-a771-3c1b20447034	2209_1	FALSE	46294	689	0.339	10	88	443.39	39018	0.84	60	719.45	43167	0.932453
AFVG_250M612	250	1e3b8ebf-6ee4-49c9-b297-b8c8626d6a9d	2220_1	FALSE	31610	154	0.339	27	58	495.78	28755	0.91	55	530.618	29184	0.923252
AFVG_250M613	250	b81bbc6f-df11-4bc5-9bc3-7f9bc518b894	222_1	FALSE	39203	292	0.513	64	50	688.74	34437	0.88	49	715.469	35058	0.894268
AFVG_250M614	250	bf1c53aa-a6d8-4808-8f1a-93d873d658a1	224_3	FALSE	35279	365	0.456	20	52	618.75	32175	0.91	47	709.979	33369	0.94586
AFVG_250M615	250	83b9770e-6288-4697-8e45-84799288c480	2251_1	FALSE	54609	551	0.335	22	68	755.91	51402	0.94	63	828.952	52224	0.956326
AFVG_250M616	250	7bec16db-5048-4e43-bbd3-3d82e14d86fa	2258_1	FALSE	51824	223	0.501	23	78	562.46	43872	0.85	56	840.482	47067	0.908209
AFVG_250M617	250	7958e07a-4eed-40df-bd8b-3eeb8f550c23	2259_1	FALSE	34048	1135	0.385	12	60	439.75	26385	0.77	41	726.366	29781	0.874677
AFVG_250M618	250	0474d47e-432b-454a-99f7-4b3d20d91d1e	225_1	FALSE	37747	283	0.417	62	54	632.06	34131	0.9	52	651.577	33882	0.897608
AFVG_250M619	250	95e4c11b-4e96-4270-88c4-db81e85c77b5	2264_1	FALSE	36088	185	0.35	34	67	489.63	32805	0.91	62	545.565	33825	0.937292
AFVG_250M620	250	c43d14ad-2b1c-4842-91ec-9b580344c809	2276_1	FALSE	32918	170	0.409	34	51	593.71	30279	0.92	49	626.51	30699	0.93259
AFVG_250M621	250	effd955a-41d2-4053-ae0b-f5cc32cd488c	227_2	FALSE	35258	769	0.476	15	64	408.28	26130	0.74	60	461.35	27681	0.785098
AFVG_250M622	250	84627ec5-d772-4e2a-99d7-6e3be09f0a85	227_4	FALSE	34826	770	0.476	14	59	464.95	27432	0.79	53	534	28302	0.812669
AFVG_250M623	250	6789117f-616a-45cb-b2cd-d3080a283b2c	2283_3	FALSE	32471	128	0.316	17	68	442.76	30108	0.93	61	500.459	30528	0.940162
AFVG_250M624	250	9ddb5a00-4f47-4166-bae6-1748be0bd642	2284_2	FALSE	35467	201	0.342	29	71	462.25	32820	0.92	68	496.147	33738	0.95125
AFVG_250M625	250	59a42263-d22a-4b9a-a6db-073d1333115c	2285_3	FALSE	37128	198	0.345	39	66	487.68	32187	0.87	57	601.316	34275	0.923158
AFVG_250M626	250	9e2392bc-3d59-4ba0-9e60-05a8b929fd71	2287_1	FALSE	33855	149	0.406	14	64	466.31	29844	0.88	59	538.576	31776	0.938591
AFVG_250M627	250	0417208d-714c-4922-842b-79083e05ce02	2293_1	FALSE	31420	129	0.319	40	60	489.05	29343	0.93	59	501	29559	0.94077
AFVG_250M628	250	4909ad80-50d5-4025-8802-b1bb6273aecd	2297_1	FALSE	33651	311	0.377	28	77	361.25	27816	0.82	51	619.353	31587	0.938665
AFVG_250M629	250	8a1c35dd-40e0-41ea-93e8-6acf67c3775d	2311_1	FALSE	35005	112	0.315	15	60	523.85	31431	0.9	61	538.574	32853	0.938523
AFVG_250M630	250	283f6a4b-60c4-47e4-9848-83b17fabab23	2318_1	FALSE	32545	426	0.375	11	62	440.9	27336	0.84	57	497.579	28362	0.87147
AFVG_250M631	250	0019a7f1-b5d9-4837-a7d7-454f00b2b26d	232_3	TRUE	35272	2156	0.454	13	75	396.84	29763	0.84	60	534.45	32067	0.909135
AFVG_250M632	250	8c03820f-1593-462c-bb7e-5eb099136310	2337_1	FALSE	34438	343	0.388	38	56	578.3	32385	0.94	52	649.558	33777	0.980806
AFVG_250M633	250	647146e7-1c88-4982-bf10-7516717a51a7	2339_2	FALSE	60116	455	0.477	10	95	576	54720	0.91	75	767.24	57543	0.957199
AFVG_250M634	250	fa16d201-eee4-48af-8e46-884e970879e5	2346_1	FALSE	57760	688	0.447	18	123	396.22	48735	0.84	83	658.229	54633	0.945862
AFVG_250M635	250	5de8d15f-597f-450d-a35e-f5c5a3cd7176	2365_1	FALSE	35768	395	0.478	52	48	665.06	31923	0.89	46	711.391	32724	0.914896
AFVG_250M636	250	c0c65ee1-f737-4c0b-8b5d-f27e52109b15	236_2	FALSE	40237	241	0.425	30	71	514.44	36525	0.91	65	567.969	36918	0.917514
AFVG_250M637	250	b849424f-503d-4374-9545-5f407da542c8	237_1	FALSE	43408	418	0.506	33	58	673.4	39057	0.9	57	699.421	39867	0.918425
AFVG_250M638	250	42729909-3826-446b-a46a-ce1af3eb92e2	237_4	FALSE	43522	417	0.507	23	67	585.45	39225	0.9	66	600.318	39621	0.910367
AFVG_250M639	250	06889647-d73d-4a8d-b875-6404eb33e482	237_7	FALSE	43646	416	0.507	11	79	482.89	38148	0.87	79	485.468	38352	0.878706
AFVG_250M640	250	5a2af54a-18c1-4669-a317-f74635b731c4	237_8	FALSE	43416	414	0.507	14	73	552.21	40311	0.93	71	568.817	40386	0.93021
AFVG_250M641	250	b560e461-d693-4399-8fe8-3df6583b927b	239_1	FALSE	40795	1252	0.479	24	61	599.46	36567	0.9	56	671.143	37584	0.921289
AFVG_250M642	250	7a9cbbb1-1f29-4231-97ba-fede99704d36	23_1	FALSE	39036	196	0.462	48	60	617.35	37041	0.95	60	617.05	37023	0.948432
AFVG_250M643	250	086d3dd6-8a8c-48e0-94e2-f94bedbf0b71	240_1	FALSE	46352	266	0.495	18	54	776.94	41955	0.9	48	892.438	42837	0.924167
AFVG_250M644	250	b9194c91-31d8-4627-8f0a-bdcdfb6f97eb	242_1	FALSE	37849	120	0.404	29	68	497.51	33831	0.89	57	610.684	34809	0.919681
AFVG_250M645	250	42857483-2e68-479c-a264-a711e111f293	243_1	FALSE	42770	103	0.525	32	54	745.5	40257	0.94	45	903.467	40656	0.950573
AFVG_250M646	250	59e77bea-8893-4380-b7d7-d5457f21bac4	246_1	FALSE	45978	494	0.493	16	50	833.46	41673	0.91	48	894.062	42915	0.933381
AFVG_250M647	250	c635b03e-956d-47a1-ba77-e66669e71bf6	248_1	FALSE	39020	228	0.329	44	61	596.95	36414	0.93	60	618.55	37113	0.951128
AFVG_250M648	250	038fdd7d-9c43-47d8-80c1-0e8c40130197	249_2	FALSE	40993	184	0.356	48	52	713.02	37077	0.9	44	862.841	37965	0.926134
AFVG_250M649	250	a824d8ff-9274-4828-85e0-b4a11fd0b583	24_4	FALSE	37145	386	0.547	24	60	577.7	34662	0.93	58	600.931	34854	0.938323
AFVG_250M650	250	03f6b3d5-e6ee-4902-8c5b-6366534a303c	24_5	FALSE	36874	385	0.547	39	58	586.6	34023	0.92	53	639.792	33909	0.919591
AFVG_250M651	250	5f719aa2-e10a-4cac-96e1-f44f7dfedb6e	250_2	FALSE	38758	163	0.398	41	61	567.98	34647	0.89	53	683.377	36219	0.934491
AFVG_250M652	250	c6105697-cb9f-44de-924a-1100d86966d8	251_2	FALSE	39649	226	0.433	51	56	657.38	36813	0.93	51	726.059	37029	0.93392
AFVG_250M653	250	7314309c-0ca9-40dd-a909-561e9d1d9f80	252_1	FALSE	44115	302	0.495	74	60	697.3	41838	0.95	56	748.607	41922	0.950289
AFVG_250M654	250	fe8a562f-61c8-49d8-91f5-c12163fa9a55	256_2	FALSE	40854	243	0.468	16	54	677.61	36591	0.9	47	800.745	37635	0.921207
AFVG_250M655	250	33c6bbe1-e0c8-424e-a2af-bf96b92f59c3	258_1	FALSE	43114	216	0.448	43	70	571.84	40029	0.93	66	614.818	40578	0.941179
AFVG_250M656	250	e6b566bd-1067-469f-92e4-24a782e5751a	25_1	FALSE	36166	387	0.514	40	61	499.13	30447	0.84	52	623.25	32409	0.896118
AFVG_250M657	250	443554d6-4294-46dd-80b6-974b0530b19f	263_2	FALSE	48900	201	0.524	11	101	393.65	39759	0.81	82	525.659	43104	0.881472
AFVG_250M658	250	7af51fd7-7781-41e4-ac80-deaac6892748	266_1	FALSE	57037	210	0.352	32	99	542.48	53706	0.94	98	549.52	53853	0.944177
AFVG_250M659	250	4469663a-05bb-4721-b8f8-f8ba2ee49215	266_2	FALSE	57037	206	0.353	54	102	526.71	53724	0.94	102	528.176	53874	0.944545
AFVG_250M660	250	bb12ce9a-045d-4528-bbef-461a685dabcf	266_4	FALSE	57052	211	0.353	57	95	572.34	54372	0.95	94	579.543	54477	0.954866
AFVG_250M661	250	a003e1bf-b26d-4738-95e1-aa299a5a3a84	268_1	FALSE	49621	298	0.398	28	70	664.59	46521	0.94	60	785.85	47151	0.950223
AFVG_250M662	250	3df21c11-d0ab-46cb-a6a6-505a7ffaa2ba	269_3	FALSE	40197	354	0.349	16	62	578.27	35853	0.89	61	588.639	35907	0.893276
AFVG_250M663	250	b50eba32-0913-4a12-89ab-f6edaaa2ea38	269_4	FALSE	40490	361	0.349	59	51	737.29	37602	0.93	49	772.286	37842	0.934601
AFVG_250M664	250	e50abeab-8f13-44b1-af85-52087652bd62	26_1	FALSE	38053	241	0.441	18	62	570.24	35355	0.93	61	586.033	35748	0.939427
AFVG_250M665	250	7356bfe9-8277-4428-80d5-0cd6b47df311	26_3	FALSE	38452	259	0.442	76	54	667.94	36069	0.94	55	657.491	36162	0.940445
AFVG_250M666	250	17210362-ccc1-4329-abd3-00c7211556d7	26_6	FALSE	38682	239	0.442	47	57	640.68	36519	0.94	56	652.286	36528	0.944315
AFVG_250M667	250	43da6c61-15e8-4e0e-98f0-8108f4ab91d7	271_2	FALSE	39895	157	0.593	21	52	697.62	36276	0.91	49	763.653	37419	0.937937
AFVG_250M668	250	adfbc079-b518-491c-9ec6-58011147acfb	272_4	FALSE	39319	124	0.473	14	71	432.63	30717	0.78	71	445.775	31650	0.804954
AFVG_250M669	250	10d5d1e6-6981-41ea-a2ca-32edc2ce7c52	272_5	FALSE	39411	114	0.472	25	72	489.92	35274	0.89	69	514.217	35481	0.900282
AFVG_250M670	250	edeed4d8-bebb-4d8a-a85f-23108b2ed0e9	272_6	FALSE	39562	124	0.473	127	56	621.16	34785	0.88	53	667.302	35367	0.893964
AFVG_250M671	250	a58ec7f6-beb8-44b9-9f37-cd00c8df2b01	272_7	FALSE	39659	124	0.472	45	59	580.32	34239	0.86	54	645.111	34836	0.878388
AFVG_250M672	250	c7017b1e-6946-4a00-be82-240cc832c154	273_1	FALSE	40795	230	0.397	17	54	647.44	34962	0.86	41	927.366	38022	0.932026
AFVG_250M673	250	ee5670ba-74c4-4508-ab6d-71f450f7f6db	274_1	FALSE	34172	321	0.485	32	53	563.26	29853	0.87	46	718.565	33054	0.967283
AFVG_250M674	250	b1f2e035-c289-466b-b028-aef65e1af0b2	276_3	FALSE	41086	175	0.356	12	70	511.16	35781	0.87	62	579.242	35913	0.874093
AFVG_250M675	250	548b9e21-65eb-4f5f-abc4-82fa769ccc22	276_5	FALSE	41034	184	0.356	42	56	674.62	37779	0.92	51	742.118	37848	0.922357
AFVG_250M676	250	6d662eb4-26ba-4faa-9fae-75282515ab5e	280_3	FALSE	41276	283	0.538	47	50	778.98	38949	0.94	50	782.76	39138	0.948202
AFVG_250M677	250	68ea093e-c809-4dc1-b400-78d4e57b3262	281_2	FALSE	40377	229	0.451	19	71	507.93	36063	0.89	57	653.421	37245	0.922431
AFVG_250M678	250	7f4ef5c7-531c-4dc6-a4ec-04306a85a46a	282_1	FALSE	39630	248	0.46	43	53	693.34	36747	0.93	49	738.429	36183	0.91302
AFVG_250M679	250	62830600-fcfb-4b11-98e1-405dc25d7d60	283_1	FALSE	37149	212	0.464	32	48	672.5	32280	0.87	47	720.255	33852	0.911249
AFVG_250M680	250	ea5316fc-7853-4aed-8bd3-3e393e9cf191	284_5	FALSE	30733	143	0.325	23	64	431.16	27594	0.9	62	448.597	27813	0.904988
AFVG_250M681	250	cac0610f-62bd-48d2-a9f2-fa9633af57b8	284_8	FALSE	30902	136	0.324	120	55	520.64	28635	0.93	54	536.944	28995	0.938289
AFVG_250M682	250	d8685b84-f1c1-4f7f-bfda-06d87539719d	285_1	FALSE	40491	449	0.386	16	57	622.05	35457	0.88	54	686.167	37053	0.915092
AFVG_250M683	250	bda9df41-94c9-41dd-82d7-7410c380d70a	287_2	FALSE	38809	137	0.439	24	65	563.68	36639	0.94	60	632.3	37938	0.977557
AFVG_250M684	250	051b5aa8-3203-4b98-aca6-2d387e6ddd65	288_1	FALSE	42542	292	0.491	66	56	679.02	38025	0.89	55	706.255	38844	0.913074
AFVG_250M685	250	522fb4ce-a013-4321-90e9-96e600763569	290_2	FALSE	38363	224	0.44	25	61	588.93	35925	0.94	55	662.945	36462	0.950447
AFVG_250M686	250	7869df1f-f0e8-4f3b-a302-35aab4844a4d	291_1	FALSE	57195	149	0.348	26	101	523.63	52887	0.92	88	628.023	55266	0.966273
AFVG_250M687	250	6ef516a1-dc4a-4e5a-9d32-16d7c47bc16f	292_3	TRUE	36604	2007	0.567	22	64	490.5	31392	0.86	52	638.596	33207	0.907196
AFVG_250M688	250	474c4077-f90b-4c61-9f86-6d96a5abbf96	294_1	FALSE	41646	368	0.364	22	60	644.75	38685	0.93	58	675.517	39180	0.940787
AFVG_250M689	250	e5092fc6-f63a-43a3-aa48-15183c9f49e2	297_2	FALSE	37441	179	0.505	60	57	624.42	35592	0.95	53	676.358	35847	0.957426
AFVG_250M690	250	5d0cc3e0-08b5-42d9-9f21-4b4bb28735d0	298_1	FALSE	40057	434	0.457	34	70	438.9	30723	0.77	56	648.696	36327	0.906883
AFVG_250M691	250	bbe9e6f5-851f-4b3e-9058-fe15e6cedd13	299_2	FALSE	43460	103	0.344	53	59	706.98	41712	0.96	53	805.245	42678	0.982006
AFVG_250M692	250	f0eec293-e61e-4161-aade-137556ce83fe	2_8	FALSE	37516	335	0.433	47	52	669.29	34803	0.93	52	669.288	34803	0.927684
AFVG_250M693	250	968e9f27-4cf2-4dad-b8ff-04fcb8caccc6	2_9	FALSE	37521	336	0.434	100	50	701.04	35052	0.93	50	700.98	35049	0.934117
AFVG_250M694	250	bcdecb57-4386-4d72-a7fa-55e43a2938c6	304_1	FALSE	38619	282	0.349	62	80	436.5	34920	0.9	55	653.018	35916	0.930009
AFVG_250M695	250	456ea38e-78a5-4696-a379-990a3f327eb4	308_1	FALSE	33851	301	0.55	53	53	589.3	31233	0.92	53	594.057	31485	0.930105
AFVG_250M696	250	d85dbb55-d5f1-4e1f-b967-a19ab164cf34	309_1	FALSE	39011	387	0.436	47	80	428.66	34293	0.88	59	618.508	36492	0.935428
AFVG_250M697	250	eaeb7016-1fa5-4524-a999-bdfd643e76e1	30_1	FALSE	40518	647	0.511	30	51	734.65	37467	0.92	50	749.4	37470	0.924774
AFVG_250M698	250	b6ce6983-bf80-40bc-868a-94483327ff9f	30_2	FALSE	40506	647	0.511	51	47	825.64	38805	0.96	48	811.938	38973	0.962154
AFVG_250M699	250	fc712d60-ec88-4112-9e86-dd3a13144929	311_1	FALSE	36621	347	0.523	20	55	611.78	33648	0.92	48	713.875	34266	0.935693
AFVG_250M700	250	0a6cb37d-eb6f-4c6d-a8c7-ff8689287c98	313_8	FALSE	41207	161	0.431	141	56	706.98	39591	0.96	55	718.909	39540	0.959546
AFVG_250M701	250	96dd0538-9f11-470e-b0cd-5d9c634f3807	314_1	FALSE	39820	429	0.47	64	58	630.98	36597	0.92	55	667.8	36729	0.922376
AFVG_250M702	250	70a25a7a-2b8e-4d1e-aaa8-30ed75b6dcf8	316_2	FALSE	38657	275	0.393	33	50	699.9	34995	0.9	51	710.294	36225	0.937088
AFVG_250M703	250	cb95dfed-7f0f-48bd-b2b3-ec35d90281b9	318_2	FALSE	39142	185	0.433	13	62	566.08	35097	0.9	59	604.78	35682	0.911604
AFVG_250M704	250	304d4106-d74a-483a-b6a1-e92ebd221657	319_3	FALSE	35376	342	0.453	40	63	464.24	29247	0.82	45	740.6	33327	0.942079
AFVG_250M705	250	d0f8b1d5-012d-4676-b412-72701f080a72	31_2	FALSE	40439	532	0.47	28	62	586.26	36348	0.9	51	717.353	36585	0.904696
AFVG_250M706	250	0c31a50e-b1d8-4d95-84d5-e1eed80a59a4	321_1	FALSE	48498	186	0.373	47	72	619.08	44574	0.92	67	674.328	45180	0.931585
AFVG_250M707	250	fa57569d-5f84-4d23-a977-b82c87538c27	322_1	FALSE	44533	499	0.552	16	60	681.75	40905	0.92	53	788.547	41793	0.938473
AFVG_250M708	250	0af32cff-b56e-4a2e-9a38-e41f450cade5	324_7	FALSE	37572	287	0.589	98	51	657.53	33534	0.89	51	670.412	34191	0.910013
AFVG_250M709	250	ce1c7cf2-d07b-40f1-b242-b558c94d69c6	324_8	FALSE	37510	296	0.588	39	55	602.18	33120	0.88	56	603.804	33813	0.90144
AFVG_250M710	250	80b43ee7-0018-4c31-834b-8a18132e36d8	326_1	TRUE	28552	1251	0.321	12	51	525.35	26793	0.94	45	613.267	27597	0.966552
AFVG_250M711	250	ed54f94b-bec5-48bf-ab3a-8b8be60ced59	329_2	FALSE	39918	535	0.452	79	49	755.82	37035	0.93	46	812.674	37383	0.936495
AFVG_250M712	250	eaeb1a3f-d01d-43b7-9110-c23974bee012	32_1	FALSE	38628	481	0.44	26	72	429.79	30945	0.8	54	635.889	34338	0.888941
AFVG_250M713	250	bde748e6-3f3d-443c-a66a-f3715cb882b3	333_1	FALSE	39601	134	0.477	12	70	459.17	32142	0.81	73	476.055	34752	0.877554
AFVG_250M714	250	2f19075c-c95c-4eae-bd0a-a180b3ca56ed	335_2	FALSE	38944	587	0.41	19	46	749.87	34494	0.88	42	838	35196	0.903759
AFVG_250M715	250	19a61caf-9110-4521-9a1a-38fd973a03f5	336_4	FALSE	39286	336	0.474	40	53	683.6	36231	0.92	48	751.125	36054	0.917732
AFVG_250M716	250	417cc4fb-4217-41eb-90a5-b5e680da122c	337_1	FALSE	37242	279	0.325	19	65	514.29	33429	0.9	65	514.985	33474	0.898824
AFVG_250M717	250	27515233-0c70-4c99-b6af-cebb508bb5f8	337_2	FALSE	37140	272	0.325	125	59	591.71	34911	0.94	58	603.724	35016	0.942811
AFVG_250M718	250	e80c1932-22ac-4c02-b45f-fc18699778d5	337_4	FALSE	37504	269	0.324	39	60	583.8	35028	0.93	59	596.797	35211	0.93886
AFVG_250M719	250	c64e7a28-398f-494b-abfd-68b4e5683bea	33_1	FALSE	33794	181	0.456	83	49	622.59	30507	0.9	46	663.913	30540	0.903711
AFVG_250M720	250	85c9eefc-b50a-4f7d-9eaa-92c9238e0e4a	340_2	FALSE	42528	312	0.533	34	61	585.98	35745	0.84	58	642.155	37245	0.875776
AFVG_250M721	250	332dea70-6730-4e6a-af33-0ae41b2cb172	340_4	FALSE	42604	313	0.532	35	62	593.85	36819	0.86	58	634.241	36786	0.86344
AFVG_250M722	250	b015fecf-29b2-4643-977e-828aab28a08f	340_7	FALSE	42012	313	0.532	37	61	585.69	35727	0.85	59	632.034	37290	0.887604
AFVG_250M723	250	53801934-9f95-4869-978c-4506e851d07a	344_4	FALSE	39427	202	0.41	55	62	571.84	35454	0.9	63	579.81	36528	0.926472
AFVG_250M724	250	c8ff666b-2da9-4b1d-87be-48064e2e9032	347_1	FALSE	43379	277	0.351	30	77	504.9	38877	0.9	78	507.962	39621	0.913368
AFVG_250M725	250	a1a31dd6-37c7-45b7-bd68-6a2f6ce12e3c	347_2	FALSE	43432	270	0.351	72	77	522.51	40233	0.93	77	526.831	40566	0.934012
AFVG_250M726	250	cbd79ab6-bf69-49ce-945e-31461b763088	347_3	FALSE	43217	286	0.352	29	76	497.64	37821	0.87	76	499.461	37959	0.878335
AFVG_250M727	250	e98931eb-6dd3-4522-b854-1daddb290c9a	348_1	FALSE	43543	285	0.35	24	83	471.72	39153	0.9	77	522.779	40254	0.924465
AFVG_250M728	250	19c4c317-6175-4040-a1ad-94fb71f89f16	34_2	FALSE	40806	207	0.415	15	75	468	35100	0.86	66	559.045	36897	0.904205
AFVG_250M729	250	444ed1b1-4ec6-4001-9d3f-3e81a6590b92	34_3	FALSE	40866	207	0.414	22	73	498.25	36372	0.89	66	561.545	37062	0.906915
AFVG_250M730	250	8558ddb1-e948-4c5b-bfd0-87950834d4e8	350_1	FALSE	41546	147	0.479	15	62	611.08	37887	0.91	52	766.558	39861	0.959443
AFVG_250M731	250	1b4853f2-1196-4209-a85d-bb2591bd6a77	352_1	FALSE	37868	227	0.438	22	65	516.97	33603	0.89	50	706.98	35349	0.933479
AFVG_250M732	250	5bf86180-c376-45d3-8808-94b63dab4eb2	355_2	FALSE	39466	211	0.567	12	70	467.79	32745	0.83	65	507.646	32997	0.836087
AFVG_250M733	250	38cf35be-c397-41df-81f1-efca1966b1a1	357_1	FALSE	40044	366	0.432	38	57	652.79	37209	0.93	54	684.167	36945	0.92261
AFVG_250M734	250	f294c6d9-6f1a-4331-874e-d6d67e007135	358_2	FALSE	36817	340	0.526	49	59	568.78	33558	0.91	51	677.471	34551	0.938452
AFVG_250M735	250	fe2c0a70-c779-40d1-b783-19591aab9564	359_1	FALSE	38201	312	0.571	15	58	582.1	33762	0.88	51	680.471	34704	0.908458
AFVG_250M736	250	b23b8aa6-6639-4297-b59a-048c1e959203	35_2	FALSE	35030	178	0.456	52	50	638.82	31941	0.91	49	658.347	32259	0.920896
AFVG_250M737	250	b8e12575-fff1-49d0-bac1-d83e09040be5	361_4	FALSE	41844	452	0.363	66	59	666.15	39303	0.94	59	666.153	39303	0.939274
AFVG_250M738	250	47a1ac4d-eb91-4b07-8faf-de403f5d4bbd	362_2	FALSE	42920	727	0.394	63	57	611.63	34863	0.81	38	1039.97	39519	0.92076
AFVG_250M739	250	cedd1a6b-4e07-4ef6-825e-d4f46e8abb97	363_4	FALSE	42676	192	0.449	64	59	684.86	40407	0.95	57	712.895	40635	0.952175
AFVG_250M740	250	f3baafc3-d6f3-4cf9-a4f0-4e1bd8c84789	364_1	FALSE	47474	2413	0.514	16	73	558.53	40773	0.86	61	712.721	43476	0.915785
AFVG_250M741	250	6225e7c1-4c1b-4b18-bb9e-502773307361	365_2	FALSE	41083	154	0.457	30	57	690.47	39357	0.96	55	718.691	39528	0.96215
AFVG_250M742	250	47b36c81-e1da-4397-9862-df486be180fc	369_1	FALSE	35674	196	0.437	17	52	627.87	32649	0.91	49	670.469	32853	0.920923
AFVG_250M743	250	017b6bc7-d665-4953-b5f1-7c9ba3967f36	370_1	FALSE	42432	365	0.333	36	93	422.03	39249	0.92	89	444.135	39528	0.931561
AFVG_250M744	250	a52da5bd-b97b-43e5-827a-f704620daff0	371_1	FALSE	35144	394	0.475	32	59	546.66	32253	0.92	50	637.32	31866	0.906727
AFVG_250M745	250	3322556e-2a0a-4dfb-a185-04277375deab	373_3	FALSE	40784	313	0.456	31	59	634.83	37455	0.92	58	648.155	37593	0.921759
AFVG_250M746	250	695c4f74-0c70-4cc1-8328-9118a3aad0d9	374_2	FALSE	40215	204	0.33	40	72	510.96	36789	0.91	70	541.157	37881	0.941962
AFVG_250M747	250	7441c156-938b-4fe3-a0eb-5b270b4171ce	376_1	FALSE	42088	108	0.442	49	65	624.78	40611	0.96	65	627.138	40764	0.968542
AFVG_250M748	250	334b5b6e-1665-415f-9388-614519d60f3c	379_1	FALSE	57814	152	0.358	19	113	478.17	54033	0.93	95	589.737	56025	0.969056
AFVG_250M749	250	5b61e03e-9e00-41d5-9f7f-c811feff5cc8	381_4	FALSE	42446	330	0.452	13	65	571.75	37164	0.88	54	736.944	39795	0.937544
AFVG_250M750	250	7ae90cfb-7b93-4263-9204-3177e4dbbe86	384_2	FALSE	42343	369	0.434	38	59	641.54	37851	0.89	57	674.368	38439	0.907801
AFVG_250M751	250	8ae787a7-6439-455f-ab07-3eb61cf20591	387_1	FALSE	43920	123	0.376	18	70	561.73	39321	0.89	60	688.95	41337	0.941189
AFVG_250M752	250	0ce1ffd4-8362-455b-b6be-07cb5d5f90eb	388_2	FALSE	58872	259	0.372	11	102	508.97	51915	0.88	79	693.949	54822	0.931207
AFVG_250M753	250	dad330d4-28b1-4e9f-b1e6-8acebcce3f70	38_3	FALSE	36938	248	0.406	12	62	521.42	32328	0.87	62	524.419	32514	0.880232
AFVG_250M754	250	bec618cd-161c-41bc-b91a-f5028e9f55d9	38_4	FALSE	37194	256	0.405	64	56	620.68	34758	0.93	57	621.737	35439	0.952815
AFVG_250M755	250	994f0a50-e34c-4106-9a61-4c45df3a12bd	38_5	FALSE	37192	255	0.406	23	61	556.03	33918	0.91	61	558.344	34059	0.915761
AFVG_250M756	250	90b2d38e-3987-443d-8f0c-b833b80726dd	396_2	FALSE	41994	132	0.459	69	57	705.89	40236	0.96	56	718.607	40242	0.95828
AFVG_250M757	250	63c6650d-a8df-4bdb-83e8-9071b135616d	397_3	FALSE	41806	132	0.458	36	60	656.5	39390	0.94	59	681.051	40182	0.961154
AFVG_250M758	250	4dc2b605-6403-4ef1-85d5-91319e5af400	399_3	FALSE	42449	166	0.485	43	67	569.15	38133	0.9	56	690.482	38667	0.910905
AFVG_250M759	250	94fb9a18-1dd5-46a6-b66e-12bf9a192c58	402_1	FALSE	49831	313	0.32	27	92	481.79	44325	0.89	76	635.605	48306	0.969397
AFVG_250M760	250	cb66b92d-8d84-4dfc-b50f-ef808f3f9fb9	40_2	FALSE	35817	256	0.408	10	61	483.05	29466	0.82	56	537.857	30120	0.840941
AFVG_250M761	250	36ac55d7-df4b-43bd-89a4-b048f7fc4797	411_6	TRUE	34406	1328	0.32	24	72	439.21	31623	0.92	69	476.087	32850	0.954775
AFVG_250M762	250	2f863380-f845-4c09-96f1-42d84bb8ef83	417_2	FALSE	35172	333	0.53	29	55	585.16	32184	0.91	53	631.868	33489	0.952149
AFVG_250M763	250	a829c686-6c15-4184-b6a7-826abe2d3eef	418_3	FALSE	41122	383	0.514	26	67	469.34	31446	0.76	61	569.262	34725	0.844439
AFVG_250M764	250	ec99ac51-74ca-4891-81db-661a09b99324	418_4	FALSE	40884	373	0.514	26	82	410.27	33642	0.82	78	462	36036	0.881421
AFVG_250M765	250	d5c0d2af-8023-4f83-91a1-e811bf111d07	419_1	FALSE	48073	427	0.361	38	70	639.51	44766	0.93	66	686.091	45282	0.941942
AFVG_250M766	250	d26ddcfd-8a2f-4af7-ac41-d86a3041f239	41_1	FALSE	38265	255	0.407	18	71	454.14	32244	0.84	57	629.526	35883	0.93775
AFVG_250M767	250	73388702-7a15-4abf-9516-7491bc09ab21	420_1	FALSE	60428	175	0.336	21	96	582.5	55920	0.93	89	639.135	56883	0.941335
AFVG_250M768	250	684d9d76-effa-4c91-b843-518c083e0e62	421_1	FALSE	40259	125	0.447	17	47	781.85	36747	0.91	44	832.5	36630	0.909859
AFVG_250M769	250	8ed3c2bb-7e8b-44e9-9417-087675baf38d	422_1	FALSE	38478	138	0.457	14	64	462.94	29628	0.77	47	746.234	35073	0.911508
AFVG_250M770	250	b53c7fc0-30c1-4352-a76c-18131e4e0945	423_4	FALSE	43611	346	0.506	75	47	878.74	41301	0.95	47	879.319	41328	0.947651
AFVG_250M771	250	5e734006-0007-413f-8fc8-10c246a60586	423_7	FALSE	43374	122	0.505	49	41	978.44	40116	0.92	43	952.814	40971	0.944598
AFVG_250M772	250	eaf852f2-1e49-4fcc-9bb8-61c1ff391ac1	423_8	FALSE	43550	286	0.506	65	47	870.13	40896	0.94	47	871.021	40938	0.940023
AFVG_250M773	250	f10feca5-2349-4935-8c27-e4f9b39e363a	423_9	FALSE	43609	342	0.506	55	47	876.96	41217	0.94	47	883.277	41514	0.951959
AFVG_250M774	250	2721c0fc-fc59-4e84-a381-86f6a02e1b18	426_2	FALSE	40892	370	0.504	13	66	514.86	33981	0.83	66	521.773	34437	0.842145
AFVG_250M775	250	8ec3dced-91a9-4c92-b62e-851e18e41906	427_1	FALSE	39318	123	0.473	18	56	591.8	33141	0.84	55	622.527	34239	0.870823
AFVG_250M776	250	12d6c8f3-3f37-455b-9fe8-f8a9750bdf84	427_2	FALSE	39133	124	0.473	13	72	455.04	32763	0.84	69	484.304	33417	0.853934
AFVG_250M777	250	2fc3fcf1-98c6-49e0-a466-653cc5016e42	428_1	FALSE	50226	1427	0.434	11	79	547.33	43239	0.86	69	660.696	45588	0.907657
AFVG_250M778	250	65d15fba-e5b7-4fbd-a786-b5dcc5d0e919	429_1	FALSE	40717	302	0.435	20	56	663.27	37143	0.91	51	733.471	37407	0.918707
AFVG_250M779	250	42f57a8d-a01f-4268-b80f-05870251c9be	435_2	FALSE	38858	215	0.314	21	77	447.43	34452	0.89	69	527.261	36381	0.936255
AFVG_250M780	250	834fd19d-f882-49d9-a639-adb3a52e3481	438_1	FALSE	40024	191	0.461	21	56	641.52	35925	0.9	53	686.434	36381	0.90898
AFVG_250M781	250	5420229c-589c-4e10-9d2f-ba58cceee4a9	440_1	FALSE	46946	511	0.469	12	88	393.51	34629	0.74	67	630.582	42249	0.899949
AFVG_250M782	250	a5a7fdeb-a3ba-469f-94fc-6c142bc35ebc	441_2	FALSE	44978	277	0.499	18	64	624.56	39972	0.89	57	738	42066	0.935257
AFVG_250M783	250	8cf2b486-0f51-4885-a159-7c0b1a6b951f	442_1	FALSE	39902	182	0.499	15	66	517	34122	0.85	47	786.191	36951	0.926044
AFVG_250M784	250	b4aa10cf-da07-491e-aa7d-2b67eaf8f3e9	443_1	FALSE	39024	456	0.542	15	61	560.26	34176	0.88	54	658.722	35571	0.911516
AFVG_250M785	250	b92f4b91-b4cc-480e-8939-9403c72f27b3	444_1	FALSE	39118	318	0.348	34	52	667.67	34719	0.89	49	710.816	34830	0.890383
AFVG_250M786	250	908799f8-d088-4e14-ab4a-c42baf42c97f	446_2	FALSE	39942	296	0.564	37	63	538.43	33921	0.85	52	686.192	35682	0.893345
AFVG_250M787	250	e5b54743-b9e1-4ea3-b1d4-ce20c88faf56	447_2	FALSE	42807	186	0.532	27	71	513.42	36453	0.85	48	838.062	40227	0.939729
AFVG_250M788	250	786cab3e-5876-4be1-af80-0e5477f02517	449_2	FALSE	35290	191	0.391	14	62	499.5	30969	0.88	60	536.3	32178	0.911816
AFVG_250M789	250	f3baba93-0b6f-4b27-8a09-37f7a5066742	44_1	FALSE	38709	240	0.429	43	57	587.53	33489	0.86	39	882.846	34431	0.889483
AFVG_250M790	250	a571bd87-7e0c-43e2-a4cd-ad2392dd0f7b	44_2	FALSE	38672	238	0.427	10	62	479.52	29730	0.77	64	486.281	31122	0.804768
AFVG_250M791	250	87c9acbe-7107-4dd3-bcf7-ecd3156e54c3	450_1	FALSE	42099	465	0.358	51	62	635.37	39393	0.94	62	637.597	39531	0.939001
AFVG_250M792	250	67fbb1d2-9887-4675-9810-c4af1a08d9bc	451_1	FALSE	36601	226	0.416	51	60	538.45	32307	0.88	57	590.684	33669	0.919893
AFVG_250M793	250	29379b9c-b722-4984-872f-7a2ff50a2c66	451_2	FALSE	37066	212	0.417	39	66	500.09	33006	0.89	55	620.891	34149	0.921303
AFVG_250M794	250	afe4ee26-47fe-4291-8eed-3103a249c251	452_4	FALSE	38134	208	0.433	79	58	595.6	34545	0.9	51	695.588	35475	0.930272
AFVG_250M795	250	37d4b8ac-9851-4b18-9bdc-8739bfb1f6e9	453_2	FALSE	43686	281	0.351	22	87	459.1	39942	0.91	85	479.435	40752	0.932839
AFVG_250M796	250	b587f1cd-412a-4341-9948-39aa96f8f839	454_3	FALSE	43679	275	0.351	71	75	545.68	40926	0.94	77	536.494	41310	0.945763
AFVG_250M797	250	a1116fa6-68ad-41ac-88fd-78b1ceb760a2	454_4	FALSE	43660	273	0.35	14	85	455.72	38736	0.89	86	456.419	39252	0.899038
AFVG_250M798	250	d2d37381-52f6-42d4-8ae1-41e50687e2f1	456_1	FALSE	37114	230	0.492	17	56	573.54	32118	0.86	47	715.468	33627	0.906046
AFVG_250M799	250	7fe06342-ffe9-45c0-a8b1-8715f58ba682	458_1	FALSE	40508	362	0.35	83	53	705.34	37383	0.92	50	750.54	37527	0.92641
AFVG_250M800	250	764b0409-74fb-4676-81b6-04c1d47723c4	458_3	FALSE	40111	356	0.35	69	53	700.87	37146	0.92	50	740.52	37026	0.923088
AFVG_250M801	250	43b575f4-980e-45d4-81de-1a3f6dc641e9	459_2	FALSE	41162	186	0.452	22	54	678	36612	0.89	52	718.154	37344	0.907245
AFVG_250M802	250	ab93ad86-3dfe-41fe-833e-92f5b4fc70ff	461_1	FALSE	40192	435	0.323	36	82	451.28	37005	0.92	83	451.59	37482	0.932574
AFVG_250M803	250	39bd41b9-7cac-4763-8047-89d2e6f34147	462_2	FALSE	56395	245	0.355	38	71	750.13	53259	0.94	64	838.266	53649	0.951308
AFVG_250M804	250	400cf8b5-0e48-49be-84e5-df716571a695	464_1	FALSE	40311	251	0.444	12	62	602.61	37362	0.93	51	737.176	37596	0.932649
AFVG_250M805	250	d4d1425d-fd46-49a9-be71-4cf16bfe8994	465_1	FALSE	41445	185	0.452	31	60	625.8	37548	0.9	52	723.404	37617	0.907637
AFVG_250M806	250	9c4528a8-ba4d-4ba6-8573-dc778961aeb2	468_2	FALSE	57086	268	0.429	10	115	439.12	50499	0.88	66	839.818	55428	0.970956
AFVG_250M807	250	c1141e86-3f90-41b4-92bf-c98a0d83ae74	469_1	FALSE	40474	148	0.335	21	61	610.77	37257	0.92	50	768.66	38433	0.949573
AFVG_250M808	250	888f2ecb-c8e0-4ed4-b5ee-a854c8253b00	471_1	FALSE	38112	358	0.431	66	67	489.09	32769	0.86	53	667.019	35352	0.927582
AFVG_250M809	250	49231578-6d5a-40c9-9634-179ae30912f4	471_2	FALSE	38097	358	0.431	41	73	446.96	32628	0.86	62	554.274	34365	0.90204
AFVG_250M810	250	b4cd7595-a4c5-4520-8436-7c3c8c7b26ad	472_2	FALSE	32042	116	0.325	25	66	438.86	28965	0.9	64	458.719	29358	0.916235
AFVG_250M811	250	fed008dd-7acb-4b8f-b106-959a6cf08036	473_4	FALSE	32470	138	0.325	11	67	432.63	28986	0.89	68	426.176	28980	0.892516
AFVG_250M812	250	28eb8398-26c3-41fe-9b7a-f80fe3acec6c	473_5	FALSE	32356	138	0.325	48	61	479.36	29241	0.9	60	489.15	29349	0.907065
AFVG_250M813	250	9f6fcd83-ca34-4f74-8be2-074f97db43ef	473_6	FALSE	32341	135	0.325	12	69	403.52	27843	0.86	67	419.866	28131	0.869825
AFVG_250M814	250	b6250cf0-e3f1-4ca9-a3b9-afb5aba5a293	475_1	FALSE	39492	294	0.439	47	77	448.91	34566	0.87	51	728.471	37152	0.940747
AFVG_250M815	250	353d8c88-1b01-4c8e-95d7-47c9c54909ac	476_1	FALSE	38747	248	0.578	16	56	593.57	33240	0.86	56	624.375	34965	0.902392
AFVG_250M816	250	ec7a2947-eab9-47ef-9db0-f9a7415c06a8	477_1	FALSE	38898	333	0.581	44	59	599.8	35388	0.91	52	686.827	35715	0.918171
AFVG_250M817	250	461d99cd-8f7e-452e-a72f-bf42320cbcb3	478_1	FALSE	42859	394	0.533	36	60	634.95	38097	0.89	57	672.737	38346	0.894701
AFVG_250M818	250	15689148-65bf-4845-b2d6-a6c3970668d8	480_1	FALSE	47881	345	0.313	32	93	482.65	44886	0.94	80	574.538	45963	0.959942
AFVG_250M819	250	5741c5e4-ba20-46d4-a90d-73c92578f24c	481_2	FALSE	39069	346	0.434	53	61	596.9	36411	0.93	57	640.263	36495	0.934117
AFVG_250M820	250	4b4cfa78-6f63-4bc5-8710-20bc4310a1d4	482_2	FALSE	47102	182	0.499	20	70	602.66	42186	0.9	60	744.2	44652	0.947985
AFVG_250M821	250	64a3faca-4774-45c9-bddf-1b38e486c572	48_1	FALSE	39688	327	0.476	51	60	596.6	35796	0.9	53	692.038	36678	0.924158
AFVG_250M822	250	88d3790d-083d-46ff-809a-aab81d7e7462	48_4	FALSE	40011	315	0.475	18	73	467.38	34119	0.85	68	524.074	35637	0.89068
AFVG_250M823	250	f4fedc1a-0567-4738-a1b9-b2b6003184bf	492_3	FALSE	45202	407	0.456	27	55	745.15	40983	0.91	44	966.614	42531	0.94091
AFVG_250M824	250	45ea32ee-3590-414a-bbf9-278a5694ad31	496_1	FALSE	36140	675	0.477	46	51	649	33099	0.92	44	765.818	33696	0.932374
AFVG_250M825	250	2a06eb07-46fc-4aaf-b862-e02ce757ecbf	497_2	FALSE	37442	171	0.401	31	53	620.49	32886	0.88	52	677.538	35232	0.940975
AFVG_250M826	250	8b4146cb-c15f-41b1-9bea-e13abe31447c	498_1	FALSE	38488	149	0.432	59	67	503.15	33711	0.88	56	629.464	35250	0.91587
AFVG_250M827	250	a2d7c2b9-141e-4383-ad26-4ceca4aba53c	499_1	FALSE	50847	1787	0.435	11	92	412.4	37941	0.75	92	459.978	42318	0.832261
AFVG_250M828	250	204bd66c-0dec-4210-b19e-934e80f43634	499_3	FALSE	51914	1838	0.434	10	104	395.31	41112	0.79	92	465.293	42807	0.824575
AFVG_250M829	250	d75416dd-a39b-4c67-bbfc-31c17d5a1f23	49_1	FALSE	40319	349	0.475	23	70	502.46	35172	0.87	54	679.278	36681	0.90977
AFVG_250M830	250	f4985dfa-6c63-4b56-8b24-1c06fff72e03	500_1	FALSE	35697	342	0.532	34	50	615.54	30777	0.86	48	662.938	31821	0.891419
AFVG_250M831	250	62c3e7db-65e4-4515-98dd-16525bf02f13	502_1	FALSE	40703	217	0.409	30	74	500.03	37002	0.91	72	514.333	37032	0.90981
AFVG_250M832	250	b95fb6d5-df8f-4379-9a46-f8e40711a16a	502_2	FALSE	40757	218	0.41	50	67	577.75	38709	0.95	68	575.471	39132	0.96013
AFVG_250M833	250	c4048791-47c3-4edb-9792-b95d122b1fac	506_12	FALSE	38138	381	0.488	142	46	753.39	34656	0.91	46	771.13	35472	0.930096
AFVG_250M834	250	a0f4029b-7cea-4111-9ab0-bc79e9f9c310	508_1	FALSE	38137	188	0.363	15	76	423.28	32169	0.84	64	550.828	35253	0.924378
AFVG_250M835	250	ede256a0-7b11-482d-bfe3-ac1b89a2d477	509_2	FALSE	41029	127	0.381	16	62	583.74	36192	0.88	57	662.421	37758	0.920276
AFVG_250M836	250	df896ef3-9c9c-440a-a312-d041c1c93d1b	50_1	FALSE	39332	226	0.429	63	55	675.44	37149	0.94	55	679.036	37347	0.949532
AFVG_250M837	250	d4c3384b-aef6-4acb-9ac5-00a722bd4ff8	510_2	FALSE	33098	358	0.529	49	56	541.07	30300	0.91	54	568.389	30693	0.927337
AFVG_250M838	250	29f806d2-de1a-4927-8792-19ef9d6fcdc3	511_2	FALSE	39056	360	0.412	52	48	740.62	35550	0.91	47	758.872	35667	0.913227
AFVG_250M839	250	ce3c92c7-3e38-46f9-86c9-e7ffc21195c3	512_1	FALSE	39591	174	0.431	37	66	564.91	37284	0.94	57	667	38019	0.960294
AFVG_250M840	250	0e1fcfbf-3898-42bf-a049-8c47a3e7b173	513_1	FALSE	59387	157	0.366	22	95	574.14	54543	0.92	89	642.64	57195	0.96309
AFVG_250M841	250	be5517ab-487f-4ae2-b13b-64b6c5d44f49	516_1	FALSE	39285	202	0.351	20	58	604.03	35034	0.89	50	719.34	35967	0.91554
AFVG_250M842	250	f4b47542-c47f-4809-a1de-6794382eeaf4	517_10	FALSE	38316	228	0.501	81	63	559.19	35229	0.92	61	576.59	35172	0.917946
AFVG_250M843	250	2417d6af-c831-420e-84ad-85aa437ed4a6	517_4	FALSE	38434	216	0.501	18	62	547.45	33942	0.88	60	568.8	34128	0.887964
AFVG_250M844	250	902a86cd-86f1-4b58-92db-f4d47d09b82f	517_6	FALSE	38769	227	0.5	51	63	555.1	34971	0.9	63	559.286	35235	0.908845
AFVG_250M845	250	ea24be16-e773-449a-958b-34a8784098d2	519_1	FALSE	37542	242	0.364	44	59	571.37	33711	0.9	54	647.667	34974	0.931597
AFVG_250M846	250	3baf46fb-d58b-4a24-b3cf-6d634d05f674	519_2	FALSE	37739	231	0.364	12	69	460.61	31782	0.84	65	503.492	32727	0.867193
AFVG_250M847	250	58d4f9ec-cf6d-443f-95dd-e8fc0adcceb5	51_1	FALSE	50131	171	0.567	30	55	809.18	44505	0.89	49	941.265	46122	0.92003
AFVG_250M848	250	bb2543c5-508c-48db-afed-bb19889264c1	523_2	FALSE	39462	238	0.591	18	61	549.25	33504	0.85	50	727.5	36375	0.921773
AFVG_250M849	250	84fe3c4c-7b7e-4f8b-bcc9-9860c5e34a77	526_2	FALSE	54227	337	0.43	32	96	479.41	46023	0.85	74	682.419	50499	0.931252
AFVG_250M850	250	f36e19f8-b549-4985-9faa-4a7dcf446d17	528_1	FALSE	33796	210	0.403	14	66	411.27	27144	0.8	53	574.528	30450	0.900994
AFVG_250M851	250	78b47006-8974-4486-8d6a-d6f571d163d1	529_1	FALSE	33938	332	0.315	19	61	486.84	29697	0.87	59	511.017	30150	0.888385
AFVG_250M852	250	65c858c1-2eeb-419d-8832-dcaa649bd5ca	530_1	FALSE	33846	332	0.314	34	60	509.35	30561	0.9	58	534.569	31005	0.916061
AFVG_250M853	250	e92a6f43-0801-4404-b95a-f54d4b0802bf	530_2	FALSE	33842	331	0.313	70	55	555.98	30579	0.9	54	574.5	31023	0.916701
AFVG_250M854	250	e37e02dd-4a55-423c-9dae-a703120bcc09	532_1	FALSE	38193	311	0.416	10	67	502.93	33696	0.88	67	516.045	34575	0.905271
AFVG_250M855	250	074c423e-be56-45fe-ab78-499229ceacc3	537_1	FALSE	36821	162	0.506	28	46	707.61	32550	0.88	44	749.864	32994	0.896065
AFVG_250M856	250	665efdeb-a5b7-4364-a6ae-83dc01f92c2e	53_3	FALSE	41908	272	0.536	73	61	593.56	36207	0.86	55	695.945	38277	0.913358
AFVG_250M857	250	3bbffeab-bf76-4c5b-b85d-83b143c79a68	540_3	FALSE	42288	473	0.523	35	58	657.31	38124	0.9	56	690.589	38673	0.914515
AFVG_250M858	250	82eff693-ca99-4259-a4e1-30178b993d33	542_1	FALSE	31704	345	0.385	38	45	653	29385	0.93	42	710.429	29838	0.941143
AFVG_250M859	250	0eb8a2b7-7f7f-4e5d-9350-2434e4491ccf	543_2	FALSE	41697	116	0.418	18	99	355.91	35235	0.84	67	569.104	38130	0.914454
AFVG_250M860	250	f6462994-316d-4570-bd6c-0a2c1ab6e337	544_2	FALSE	41166	116	0.417	15	97	331.36	32142	0.78	75	497.12	37284	0.905699
AFVG_250M861	250	7cd2938c-e739-4ead-a9d3-d4cc4dd0ff2e	545_1	FALSE	38614	344	0.407	87	68	532.9	36237	0.94	69	529.217	36516	0.945667
AFVG_250M862	250	58d48488-b4c7-43db-afd8-5bc14032feb2	545_6	FALSE	38619	345	0.409	70	73	491.88	35907	0.93	74	487.865	36102	0.934825
AFVG_250M863	250	01b7416f-082c-43c8-af43-67aa51fc5c21	545_7	FALSE	38352	339	0.408	14	77	453.31	34905	0.91	77	453.312	34905	0.910122
AFVG_250M864	250	b60b5ee3-608b-4320-886d-25f48f4d7ce0	545_9	FALSE	38341	341	0.408	94	60	598.3	35898	0.94	60	598.3	35898	0.936282
AFVG_250M865	250	604a7650-300a-44f5-9874-5d4d1050d23b	549_3	FALSE	39345	199	0.34	43	70	519.77	36384	0.92	69	542.522	37434	0.95143
AFVG_250M866	250	00046a6a-6628-4a12-bbb6-382e19399e15	550_1	FALSE	39555	213	0.329	13	81	380.15	30792	0.78	65	565.431	36753	0.929162
AFVG_250M867	250	704c2bc9-9d23-42a1-8b48-071042b2c643	554_10	FALSE	41424	631	0.525	74	53	735.23	38967	0.94	54	726.444	39228	0.946987
AFVG_250M868	250	ace9958a-c76d-4833-82c4-fda44b82d730	554_2	FALSE	40792	629	0.526	28	50	763.74	38187	0.94	51	765.176	39024	0.956658
AFVG_250M869	250	7a5a732c-66fb-4072-9681-f80ba23d85b0	554_5	FALSE	41240	639	0.525	70	50	774.78	38739	0.94	50	787.14	39357	0.95434
AFVG_250M870	250	007629f4-c395-4559-9a64-cfebd407f721	554_9	FALSE	41385	632	0.525	15	59	622.07	36702	0.89	59	627.763	37038	0.894962
AFVG_250M871	250	d468e01e-290d-4dba-a3a7-003c645f7f49	556_2	FALSE	40454	356	0.518	19	62	478.16	29646	0.73	60	539.05	32343	0.799501
AFVG_250M872	250	c36d6896-6961-444a-8739-912550c0e61f	556_5	FALSE	40131	318	0.519	27	56	503.41	28191	0.7	56	572.143	32040	0.798385
AFVG_250M873	250	692bcc7e-099e-4754-beb0-d8ae0ebe97af	559_3	FALSE	54161	305	0.428	96	69	723.57	49926	0.92	69	730.304	50391	0.930393
AFVG_250M874	250	270ba7d1-c67c-4b22-ae0e-80ef67fbf961	561_1	FALSE	39319	158	0.411	13	78	397	30966	0.79	67	508.164	34047	0.865917
AFVG_250M875	250	461306a6-460a-4b7b-ab30-62340de37cbf	562_2	FALSE	41212	361	0.435	23	58	652.76	37860	0.92	56	689.625	38619	0.937081
AFVG_250M876	250	d4cf4bfb-41d6-4502-967c-531f489f331b	565_1	FALSE	43812	267	0.451	41	49	839.02	41112	0.94	46	905.478	41652	0.950698
AFVG_250M877	250	5fd27a3e-3a6c-4431-a0cf-8c155e091c83	566_1	FALSE	37306	494	0.385	16	58	552.83	32064	0.86	51	657.706	33543	0.899132
AFVG_250M878	250	e987ba58-5dfa-473f-ac0d-9807fdf7292f	567_3	FALSE	37539	516	0.383	31	57	577.37	32910	0.88	55	616.909	33930	0.90386
AFVG_250M879	250	311e15ad-5591-4d6b-b3bc-4fbfaffed39a	569_1	FALSE	56258	111	0.317	32	102	514.44	52473	0.93	97	552.464	53589	0.952558
AFVG_250M880	250	8de2b510-443d-4b29-b406-7ec112955af2	570_1	FALSE	40716	379	0.49	18	77	404.77	31167	0.76	56	622.339	34851	0.855953
AFVG_250M881	250	0c2ce1d8-2913-4b9a-8a83-f9ed2eb9cf27	571_6	FALSE	35046	372	0.575	33	56	592.29	33168	0.95	53	629.491	33363	0.951977
AFVG_250M882	250	f4aada3e-66e6-4cee-95e5-4d4f261d885c	571_7	FALSE	35630	371	0.575	51	51	650.06	33153	0.93	50	681.9	34095	0.956918
AFVG_250M883	250	d7ac980d-ade7-4cc6-9176-890df24a6991	571_8	FALSE	35684	372	0.574	119	52	637.27	33138	0.93	52	639.288	33243	0.931594
AFVG_250M884	250	14fd90ee-0147-4732-adfe-6907be0c42a6	571_9	FALSE	35894	370	0.574	35	49	665.88	32628	0.91	52	634.962	33018	0.919875
AFVG_250M885	250	0524c51f-ef35-4eaf-9d44-24ba0b5f7e2b	572_1	FALSE	45942	234	0.392	29	59	723.15	42666	0.93	56	775.071	43404	0.944756
AFVG_250M886	250	685ded70-a650-442d-9afc-d880475cadb1	575_1	FALSE	38956	251	0.464	17	74	450.36	33327	0.85	56	656.036	36738	0.943064
AFVG_250M887	250	3af47b6f-543d-4360-bcd6-9df254995e8c	577_2	FALSE	39859	156	0.438	61	53	694.87	36828	0.92	52	713.135	37083	0.930354
AFVG_250M888	250	7494734c-3890-4dc1-8c23-9ee15daa4446	578_1	FALSE	39819	157	0.438	31	52	703.27	36570	0.92	50	744.48	37224	0.93483
AFVG_250M889	250	275df762-61b6-4f43-a62b-d4989ac9ea07	579_2	FALSE	43106	592	0.399	25	61	617.11	37644	0.87	48	812.375	38994	0.904607
AFVG_250M890	250	30abf97d-b302-47a2-9d75-4439170db386	580_4	FALSE	37606	410	0.427	101	61	575.21	35088	0.93	54	649.889	35094	0.933202
AFVG_250M891	250	e62d4bbb-16d5-4c68-b07b-fa73b99eabfa	581_1	FALSE	38698	122	0.482	42	64	573.14	36681	0.95	58	642.052	37239	0.962298
AFVG_250M892	250	a81f6c38-36b5-4738-a784-21fa2e97f169	582_1	FALSE	59671	189	0.355	11	130	382.06	49668	0.83	95	589.547	56007	0.938597
AFVG_250M893	250	2ef145ee-27d4-4999-90cb-2e1c294d2360	583_1	FALSE	40373	215	0.453	70	50	705.12	35256	0.87	44	812.659	35757	0.885666
AFVG_250M894	250	4da5a4d7-4c8d-42e8-ae82-bdad09551854	584_1	FALSE	39837	247	0.32	10	91	336.23	30597	0.77	75	487.28	36546	0.917388
AFVG_250M895	250	1d2d9dea-d788-4409-9ac9-fda47e586bff	587_2	FALSE	42805	273	0.523	64	55	746.45	41055	0.96	49	837.98	41061	0.959257
AFVG_250M896	250	9bf8b6f4-0378-479f-86a3-7ef56a06754a	588_1	FALSE	42238	209	0.566	10	69	504.13	34785	0.82	60	646.45	38787	0.918296
AFVG_250M897	250	bf40a585-a850-41cb-b0ca-ab1742aa4b86	591_5	FALSE	35386	276	0.546	43	55	593.18	32625	0.92	55	596.618	32814	0.927316
AFVG_250M898	250	cb94f72c-1ffc-451f-8abd-b4dcb435a4ef	591_6	FALSE	35221	298	0.547	39	59	510.05	30093	0.85	60	510.8	30648	0.870163
AFVG_250M899	250	27647b90-74ba-42db-a47c-cadd7ae465d7	591_7	FALSE	35202	297	0.547	38	56	598.55	33519	0.95	55	607.909	33435	0.949804
AFVG_250M900	250	1104db0e-124b-4c7a-815e-6b9883530102	591_8	FALSE	35096	297	0.547	67	57	564	32148	0.91	57	570.368	32511	0.926345
AFVG_250M901	250	7c7d645f-d073-4011-94d8-9a8bca89ee1f	597_3	FALSE	58308	241	0.391	74	85	642	54570	0.94	83	662.205	54963	0.942632
AFVG_250M902	250	e850caa9-6b42-42c1-80ba-dba0eb5bf45c	598_3	FALSE	39262	250	0.417	23	54	661	35694	0.91	53	674.151	35730	0.91004
AFVG_250M903	250	6684fa14-27eb-461a-9b79-20809e40910a	598_4	FALSE	38918	247	0.416	26	51	689.71	35175	0.9	53	671.094	35568	0.913922
AFVG_250M904	250	ef41ff2a-8aa0-499c-823c-a7454e32781a	599_1	FALSE	40780	188	0.329	48	84	455.14	38232	0.94	81	479.63	38850	0.952673
AFVG_250M905	250	d7f1fed1-e8ea-4b9f-b5c1-98b01686a22a	59_1	TRUE	39329	1859	0.392	41	55	655.85	36072	0.92	52	698.596	36327	0.92367
AFVG_250M906	250	ebd6f760-86ea-4064-94b2-58396087c4a8	59_2	TRUE	39211	1705	0.392	16	67	510.4	34197	0.87	61	555	33855	0.863406
AFVG_250M907	250	f73b60f1-6e2b-4c34-9aa6-b19bb9c783cf	5_2	FALSE	37088	375	0.561	75	74	446.07	33009	0.89	60	526.05	31563	0.85103
AFVG_250M908	250	84dcfede-cf2a-4d07-a9e2-72249880f588	5_3	FALSE	37318	377	0.561	63	74	439.82	32547	0.87	61	566.607	34563	0.926175
AFVG_250M909	250	0b3a7420-d176-4983-8620-3fdbedf3af4c	602_4	FALSE	36261	298	0.323	64	62	547.94	33972	0.94	57	604.895	34479	0.950856
AFVG_250M910	250	d17c9738-cb92-473b-ac08-190d9bff3b00	603_1	FALSE	38619	241	0.512	32	64	491.67	31467	0.81	51	690.059	35193	0.911287
AFVG_250M911	250	d850ffff-2a87-47e8-a42b-e6eceeb51bad	605_2	FALSE	70418	4745	0.371	11	127	463.37	58848	0.84	105	613.114	64377	0.914212
AFVG_250M912	250	d9f4b046-cb71-402b-8bd7-1c728bdbb489	609_1	FALSE	40321	417	0.453	20	61	575.61	35112	0.87	52	716.712	37269	0.924307
AFVG_250M913	250	87033b2c-4085-4164-a482-6cd596df7103	609_2	FALSE	40758	418	0.45	36	69	527.3	36384	0.89	56	675.643	37836	0.928309
AFVG_250M914	250	400b08b2-cfe1-425c-9e22-87b5082c93de	60_24	FALSE	38724	318	0.457	37	54	658.89	35580	0.92	54	658.889	35580	0.91881
AFVG_250M915	250	b4d248cc-3a44-4bdd-9b4d-a45854fdf8fd	60_25	FALSE	38652	302	0.456	121	56	642.11	35958	0.93	55	654.164	35979	0.930844
AFVG_250M916	250	5cf25e65-d1bb-4d75-9434-0c2dd12fb5e0	60_26	FALSE	38723	315	0.456	73	58	621.31	36036	0.93	57	632	36024	0.9303
AFVG_250M917	250	8bd8bd4f-b42b-4dc2-91d2-1ffe7ad99b42	60_27	FALSE	38726	318	0.456	43	55	647.13	35592	0.92	55	647.127	35592	0.919072
AFVG_250M918	250	b5b6206a-9765-404b-ac84-f467059e30f6	60_28	FALSE	38726	318	0.456	104	54	664.39	35877	0.93	53	677.208	35892	0.926819
AFVG_250M919	250	96de0c0c-4171-4ace-9c29-46b9d8f9cd00	60_29	FALSE	38637	312	0.456	108	57	637.32	36327	0.94	54	671.278	36249	0.938194
AFVG_250M920	250	687230e6-f110-4855-80bb-b76396c0d908	60_31	FALSE	38713	318	0.456	13	66	488.5	32241	0.83	66	488.5	32241	0.832821
AFVG_250M921	250	f37db870-b0fe-4585-bbc4-4111c10144f4	613_1	FALSE	39785	138	0.444	17	63	564.52	35565	0.89	57	654.158	37287	0.937213
AFVG_250M922	250	6e9a3def-5111-4c31-9715-5d7c6010b006	615_9	FALSE	35272	352	0.483	74	46	729.85	33573	0.95	45	750.6	33777	0.957615
AFVG_250M923	250	ee20aff6-e335-487e-b175-9f02874ca72d	616_2	FALSE	42639	299	0.498	35	68	513.71	34932	0.82	64	592.547	37923	0.889397
AFVG_250M924	250	4664d94d-8126-4de7-8812-fb4465c1066a	620_1	FALSE	42364	429	0.364	19	65	601.57	39102	0.92	59	685.831	40464	0.955151
AFVG_250M925	250	d963c413-c7b2-4352-bf06-8911a0953409	621_3	FALSE	39986	202	0.428	28	88	382.88	33693	0.84	74	482.838	35730	0.893563
AFVG_250M926	250	ebb39f74-1238-40ab-ba62-0928e8bae0d5	621_4	FALSE	40057	202	0.428	39	91	367.75	33465	0.83	82	424.939	34845	0.869885
AFVG_250M927	250	ff263019-1411-472e-a1a0-cc69093362f8	621_5	FALSE	40156	202	0.428	47	84	397.32	33375	0.83	73	486.904	35544	0.885148
AFVG_250M928	250	5b8372ac-54ad-470d-9b96-ad91e0e4a825	621_6	FALSE	40169	202	0.429	13	94	350.01	32901	0.82	85	396.353	33690	0.838706
AFVG_250M929	250	790c54e5-397e-4add-98fd-3e8be90cfd46	625_2	FALSE	40622	164	0.373	15	60	609.1	36546	0.9	60	611.45	36687	0.903131
AFVG_250M930	250	b7938e08-c608-4a3f-9672-31533e85e1d9	625_3	FALSE	40476	164	0.373	32	56	663.64	37164	0.92	55	674.564	37101	0.916617
AFVG_250M931	250	7af79cc6-db10-4f2c-8c2b-5ff4e23b84e1	628_1	FALSE	34025	207	0.499	26	45	680.47	30621	0.9	42	750.714	31530	0.926672
AFVG_250M932	250	8cec328d-231b-4f8b-89c0-f547168a2ca6	630_1	FALSE	41333	252	0.567	24	42	866.86	36408	0.88	41	887.927	36405	0.880773
AFVG_250M933	250	d469a0a8-1175-4a52-9e75-f9bfa20007cf	630_2	FALSE	41343	251	0.568	51	46	832.96	38316	0.93	46	834.522	38388	0.928525
AFVG_250M934	250	f64c71fc-2399-4fbe-a618-2ffd39601378	631_1	FALSE	34311	269	0.405	51	52	601.15	31260	0.91	46	679.761	31269	0.91134
AFVG_250M935	250	e6022e26-1d6b-4659-8077-426651409545	632_2	FALSE	39984	169	0.437	32	70	529.03	37032	0.93	65	577.523	37539	0.938851
AFVG_250M936	250	b7b21a6e-93c0-4e6a-94f9-17e2a8c908eb	634_2	FALSE	59353	310	0.317	19	110	492.82	54210	0.91	98	577.071	56553	0.952825
AFVG_250M937	250	dd9b9377-d192-4ba7-a300-37fa1bffbdf0	636_1	FALSE	54849	706	0.333	20	82	631.06	51747	0.94	68	771.441	52458	0.956408
AFVG_250M938	250	f25c0465-b8ef-462e-9d99-05272afb4beb	647_14	FALSE	38189	431	0.449	68	60	593.15	35589	0.93	58	613.603	35589	0.931918
AFVG_250M939	250	50dc8bc1-e029-4aed-b9a3-451a96dcdc71	647_15	FALSE	38125	392	0.449	13	79	416.09	32871	0.86	75	441.76	33132	0.869036
AFVG_250M940	250	f0d56a5a-e328-4196-95e9-1cb5478dea45	647_9	FALSE	38386	411	0.449	23	61	574.13	35022	0.91	61	580.426	35406	0.922368
AFVG_250M941	250	e24bf3b8-9e3f-4b70-b108-e33d741113f0	650_1	FALSE	33533	332	0.316	23	72	385.92	27786	0.83	54	566.722	30603	0.912623
AFVG_250M942	250	115fb1f8-0956-407e-8cff-4fc3f4f9bc13	659_2	FALSE	41164	451	0.449	17	57	639.68	36462	0.89	54	683.167	36891	0.896196
AFVG_250M943	250	04e0e93f-6dab-43a9-986c-d1d336213d00	65_2	TRUE	41950	689	0.356	19	81	437.07	35403	0.84	75	519.36	38952	0.928534
AFVG_250M944	250	13b420fc-2af6-4f49-8724-7dc853986211	660_5	FALSE	40672	274	0.452	33	58	651.67	37797	0.93	58	651.672	37797	0.929313
AFVG_250M945	250	9cd8a67c-9d49-4350-b0be-401b85f2e523	660_6	FALSE	40693	208	0.452	18	60	603.7	36222	0.89	59	617.034	36405	0.894626
AFVG_250M946	250	6515862e-a7f1-43ed-a8a7-536475e8a807	660_7	FALSE	41129	321	0.453	27	62	603.73	37431	0.91	62	603.629	37425	0.909942
AFVG_250M947	250	3b036578-9bda-4738-8c0c-fd8d61baf157	660_8	FALSE	40823	281	0.453	30	57	664.16	37857	0.93	57	665.632	37941	0.929403
AFVG_250M948	250	86b8e767-de7c-4e10-bec2-de73e9723f2b	660_9	FALSE	40870	327	0.453	11	73	478.89	34959	0.85	73	478.767	34950	0.85515
AFVG_250M949	250	2838d7cd-fe76-492c-9e62-2b2f39277731	661_2	FALSE	34198	200	0.39	32	43	692.79	29790	0.87	41	783	32103	0.938739
AFVG_250M950	250	8d4613b2-1e43-4801-a5ce-5ed9d32f8481	663_3	FALSE	38465	142	0.402	38	59	586.47	34602	0.9	56	646.179	36186	0.940751
AFVG_250M951	250	f0cc2add-09f6-484d-a520-c47e9990ff1e	668_1	FALSE	39961	147	0.425	20	59	641.08	37824	0.95	54	716.278	38679	0.967919
AFVG_250M952	250	e014d614-d9db-4dab-9032-b2345ef64bba	670_2	FALSE	41155	417	0.555	22	47	807.06	37932	0.92	47	816.894	38394	0.932912
AFVG_250M953	250	a14c75bc-25e3-4077-8627-399cb39d1412	674_5	FALSE	39863	298	0.422	25	61	588.93	35925	0.9	58	623.586	36168	0.907308
AFVG_250M954	250	7e3dfa1f-b066-4518-bd62-bdb513c08347	674_6	FALSE	39850	302	0.422	83	59	627.92	37047	0.93	58	638.379	37026	0.929134
AFVG_250M955	250	ff61a66c-3cf2-4408-8b9b-6fb57ba319df	675_1	FALSE	36641	247	0.515	70	45	752.6	33867	0.92	44	779.25	34287	0.935755
AFVG_250M956	250	9c490c91-8a15-44a3-8505-693c03db0d2e	675_2	FALSE	36843	243	0.516	13	54	620.33	33498	0.91	54	624.278	33711	0.914991
AFVG_250M957	250	aefbd3d1-0690-4b28-9e4e-46d088498282	676_1	FALSE	35127	463	0.36	16	73	431.38	31491	0.9	54	613.778	33144	0.943548
AFVG_250M958	250	876a77c5-065e-41fb-88ae-1831f1d7748b	677_1	FALSE	53620	196	0.356	74	75	671.96	50397	0.94	73	700.644	51147	0.953879
AFVG_250M959	250	3af92382-1457-4511-9e94-315de1d2de60	677_2	FALSE	54044	193	0.356	24	77	657.86	50655	0.94	74	692.595	51252	0.948338
AFVG_250M960	250	7a413ad3-f53e-415e-897d-5cb19a101ba6	678_1	FALSE	41326	364	0.382	89	50	775.26	38763	0.94	49	796.898	39048	0.944877
AFVG_250M961	250	b65c768d-695e-410a-aad5-54ecfdf1b844	67_2	FALSE	37198	264	0.429	34	69	449.04	30984	0.83	61	514.131	31362	0.84311
AFVG_250M962	250	d57b4519-0af2-4c53-9d7f-a0e40c5fcc85	67_3	FALSE	37305	263	0.43	15	67	433.66	29055	0.78	65	450.554	29286	0.785042
AFVG_250M963	250	fb78c4a0-be01-426f-93da-a04da05d2fe3	67_4	FALSE	37443	254	0.428	20	73	427.23	31188	0.83	69	462.087	31884	0.851534
AFVG_250M964	250	d41b3e06-7780-479f-bea9-e98f607926cc	67_5	FALSE	37502	254	0.428	40	66	471.45	31116	0.83	64	514.031	32898	0.877233
AFVG_250M965	250	cea16525-a8c8-4b83-85fb-46ab0790dc5f	681_2	FALSE	37673	213	0.374	23	62	535.35	33192	0.88	54	624.556	33726	0.89523
AFVG_250M966	250	af391d41-13bd-423f-bd51-e8df8987f46b	681_4	FALSE	38120	213	0.374	23	62	544.02	33729	0.88	49	705.49	34569	0.906847
AFVG_250M967	250	744ffe36-3028-4ba2-9eaa-bf15da2889b0	682_2	FALSE	40751	357	0.376	35	64	575.86	36855	0.9	56	686.304	38433	0.943118
AFVG_250M968	250	b0e261ac-0ffe-480c-8889-8bf901477e82	683_4	FALSE	39042	216	0.442	57	56	640.5	35868	0.92	52	688.269	35790	0.916705
AFVG_250M969	250	5fb2cf6e-2602-44c2-9b49-1e2e405f575f	683_5	FALSE	39060	223	0.442	54	55	641.67	35292	0.9	51	692.294	35307	0.903917
AFVG_250M970	250	1ad2f4a5-483a-4cec-997f-e5e02a2e92f3	684_1	FALSE	38452	372	0.319	26	70	516.39	36147	0.94	66	551.227	36381	0.946141
AFVG_250M971	250	a42c7a21-77bb-428c-8f82-c7f7a3981448	688_2	FALSE	41990	336	0.503	14	57	643.79	36696	0.87	53	728.151	38592	0.919076
AFVG_250M972	250	3d78b733-74cd-4532-b1fe-181db8d4a40c	68_1	TRUE	41795	1759	0.357	29	84	445.04	37383	0.89	79	488.165	38565	0.922718
AFVG_250M973	250	c9d32a96-c371-4763-8358-ea5b6f0367c1	68_2	TRUE	41669	1661	0.357	25	85	429.78	36531	0.88	78	477.423	37239	0.893686
AFVG_250M974	250	054c0b9d-5f86-4e5b-b274-8413de3a5756	68_3	TRUE	41419	1403	0.357	17	94	387.64	36438	0.88	92	402.717	37050	0.894517
AFVG_250M975	250	50174182-8e0d-41c1-aa6f-a156c6c92ff7	690_4	FALSE	60095	226	0.377	113	88	649.91	57192	0.95	86	665.163	57204	0.951893
AFVG_250M976	250	a32e0118-e3b8-4188-90ef-2aa4416d6fbb	691_1	FALSE	37489	192	0.5	33	57	619.68	35322	0.94	55	649.145	35703	0.952359
AFVG_250M977	250	291d323f-bab7-4e9e-aea2-406a50abb055	695_1	FALSE	37880	451	0.47	25	66	519.55	34290	0.9	53	672.283	35631	0.940628
AFVG_250M978	250	4da0c382-af5a-4040-a047-321c16c11ebc	698_1	FALSE	44688	287	0.5	85	58	712.91	41349	0.92	57	735.737	41937	0.93844
AFVG_250M979	250	0b6da075-aef8-4210-8c99-eca131272061	699_4	FALSE	31923	147	0.328	68	58	499.97	28998	0.91	56	529.071	29628	0.928108
AFVG_250M980	250	0926e093-8f9a-4b2d-972b-043f506ef96d	700_1	FALSE	37434	336	0.43	25	62	506.23	31386	0.84	58	557.379	32328	0.8636
AFVG_250M981	250	0bebee82-0657-442d-a4ba-786d1363385a	702_1	FALSE	45125	408	0.456	24	46	897	41262	0.91	42	1014.29	42600	0.944044
AFVG_250M982	250	cc6db145-7dcc-496b-a14a-0e73aaa9e8ce	703_1	FALSE	39951	265	0.402	19	53	684.79	36294	0.91	48	760.25	36492	0.913419
AFVG_250M983	250	855b9b7f-aa2e-4f58-aa10-4324b083caf4	704_1	FALSE	39245	413	0.378	18	58	590.43	34245	0.87	52	677.712	35241	0.897974
AFVG_250M984	250	c7b8f0d7-16c7-4525-8ee6-9aaa156997ad	705_2	FALSE	43240	186	0.356	20	59	688.22	40605	0.94	54	777	41958	0.970352
AFVG_250M985	250	3301eed4-b2fb-4b3f-b9ce-07b64b3d1eb0	707_3	FALSE	40193	317	0.436	26	56	650.57	36432	0.91	54	686.778	37086	0.922698
AFVG_250M986	250	260903ef-b70b-4540-982c-42976b29b2e7	707_5	FALSE	40386	306	0.436	89	52	707.08	36768	0.91	52	718.673	37371	0.925345
AFVG_250M987	250	18bbf13d-b9c9-4fda-9f14-71e084413cf6	707_7	FALSE	40400	306	0.436	25	55	678	37290	0.92	55	673.364	37035	0.916708
AFVG_250M988	250	f5805cf1-ba34-4f55-ae84-8cea1905cf2a	708_2	FALSE	49028	294	0.329	18	85	515.93	43854	0.89	70	668.7	46809	0.95474
AFVG_250M989	250	251c9a71-5d35-4344-abed-cf3e461bba2b	709_1	FALSE	49988	289	0.33	46	74	639.12	47295	0.95	71	679.859	48270	0.965632
AFVG_250M990	250	a6593e8f-a77e-4575-9d1b-4d405cefef21	70_1	FALSE	36409	856	0.443	35	56	586.29	32832	0.9	54	616.389	33285	0.914197
AFVG_250M991	250	a2ba053a-5030-4793-af3a-e60df85c901f	710_1	FALSE	39525	360	0.392	61	54	677.5	36585	0.93	52	708	36816	0.931461
AFVG_250M992	250	74042979-6ffa-4675-b204-817a4330a248	715_1	FALSE	43920	307	0.326	35	82	490.43	40215	0.91	76	548.803	41709	0.949658
AFVG_250M993	250	e31859ab-b429-4898-8540-4e223c169ae0	717_1	FALSE	41660	281	0.512	16	62	571.98	35463	0.85	58	622.397	36099	0.866515
AFVG_250M994	250	70b070b4-8eef-424e-a297-3f1f8ccd6374	71_1	FALSE	41572	134	0.519	22	50	770.7	38535	0.93	46	846.391	38934	0.936544
AFVG_250M995	250	76e9a9e4-596e-4d9e-a138-c8dccf0b0010	720_1	FALSE	41992	164	0.45	34	57	713.21	40653	0.97	56	722.679	40470	0.963755
AFVG_250M996	250	111d04bf-1e9f-4e1f-9edf-27b8ef590655	721_1	FALSE	35492	222	0.629	33	58	556.14	32256	0.91	40	788.7	31548	0.888876
AFVG_250M997	250	0df190d8-a6af-4297-a3b8-431ea636d933	722_11	TRUE	35870	1718	0.506	10	60	501.6	30096	0.84	55	585.764	32217	0.89816
AFVG_250M998	250	1805f123-0bf2-4dee-bc47-d2251f0f4305	722_2	TRUE	36195	2213	0.503	12	61	528.93	32265	0.89	58	561.052	32541	0.899047
AFVG_250M999	250	7026704d-39a7-43b9-ba3e-002dcd9d021c	722_6	TRUE	36563	2560	0.504	43	45	731.07	32898	0.9	43	781.047	33585	0.918552
AFVG_250M1000	250	acbeda16-6507-4e09-8eb4-74c79d903b96	722_8	TRUE	36166	2167	0.506	31	47	734.36	34515	0.95	47	734.553	34524	0.954598
AFVG_250M1001	250	71f229dc-9ee2-4367-ac2b-ad54f6c4338e	724_1	FALSE	52299	503	0.396	25	74	591.04	43737	0.84	63	750.476	47280	0.904033
AFVG_250M1002	250	a639e914-f393-4322-a483-bfbd0454e6f9	727_1	FALSE	41537	391	0.39	29	67	524.28	35127	0.85	46	804.196	36993	0.890604
AFVG_250M1003	250	97b1216e-662a-48b1-839e-d0b11a94995c	729_1	FALSE	38977	628	0.447	20	58	566.59	32862	0.84	56	611.518	34245	0.878595
AFVG_250M1004	250	2caefb5e-c7b4-49c3-985c-c5f08a483467	730_2	FALSE	39155	217	0.356	27	62	580.26	35976	0.92	57	639	36423	0.930226
AFVG_250M1005	250	ce7b4d63-b06f-4bae-91ae-57fafcdf9ced	733_2	FALSE	41993	125	0.517	13	49	775.65	38007	0.9	44	892.091	39252	0.934727
AFVG_250M1006	250	1befb07c-13d4-4b4e-8ff8-738e74f28d34	734_1	FALSE	37944	284	0.376	78	64	531.89	34041	0.9	54	640.389	34581	0.911369
AFVG_250M1007	250	e6499283-138b-413b-838e-c70be30798fe	736_1	FALSE	44328	365	0.41	51	63	643	40509	0.91	56	742.714	41592	0.938278
AFVG_250M1008	250	a514784e-d141-4146-a140-fad86b47b341	737_2	FALSE	37950	247	0.497	24	62	500.95	31059	0.82	60	543.15	32589	0.858735
AFVG_250M1009	250	35ddbdb5-300f-4d77-9401-cd27d28523c7	738_1	FALSE	38310	226	0.435	29	48	738.12	35430	0.92	44	806.386	35481	0.926155
AFVG_250M1010	250	cd10505d-68ca-43ab-9a78-06019bc3b28c	739_2	FALSE	40162	187	0.403	46	48	788	37824	0.94	46	826.174	38004	0.946268
AFVG_250M1011	250	f557f9e4-fe62-4ba5-81c2-8bf3bb099819	73_2	FALSE	39605	216	0.433	168	54	699.89	37794	0.95	54	699.667	37782	0.95397
AFVG_250M1012	250	d2c18047-9d72-4bac-a274-2bed195c0f44	740_1	FALSE	37345	226	0.456	24	53	628.87	33330	0.89	47	740.106	34785	0.93145
AFVG_250M1013	250	689dbaa2-81e0-40cd-9a21-07c623ffdaa4	741_1	FALSE	37635	212	0.484	19	50	654.06	32703	0.87	50	669.84	33492	0.889916
AFVG_250M1014	250	aa11f0c4-787e-49af-84bd-fa2c9df029b9	742_3	FALSE	37345	235	0.472	42	47	722.11	33939	0.91	47	740.043	34782	0.93137
AFVG_250M1015	250	6e18dda7-e73f-4f18-9121-c8324a5ca4c7	745_2	FALSE	45148	315	0.633	25	55	731.62	40239	0.89	45	934.6	42057	0.931536
AFVG_250M1016	250	1fae46cd-8ef7-476a-ba2a-c76512b4ff1d	746_1	FALSE	37983	180	0.369	15	70	474.77	33234	0.87	55	636.927	35031	0.922281
AFVG_250M1017	250	eb0f7194-0ede-442a-b18f-ae433a0ab99f	747_1	FALSE	43980	287	0.472	38	58	712.76	41340	0.94	56	734.893	41154	0.935744
AFVG_250M1018	250	fe29ed8e-4520-49f5-a89a-83c04615d695	748_3	FALSE	37603	230	0.501	79	43	784.26	33723	0.9	42	803.571	33750	0.897535
AFVG_250M1019	250	b82cc16f-438b-470b-a2cf-36ad13a19a1e	749_2	FALSE	42212	220	0.48	39	47	793.85	37311	0.88	44	868.432	38211	0.905217
AFVG_250M1020	250	f3d633ab-60f8-428e-88ff-f252a75f3574	751_5	TRUE	38864	2904	0.579	61	50	699.24	34962	0.9	47	760.787	35757	0.920055
AFVG_250M1021	250	54c995c9-b4c9-43d4-8e5b-23308d77b932	755_2	FALSE	34933	237	0.429	35	59	530.08	31275	0.89	56	572.464	32058	0.9177
AFVG_250M1022	250	56787615-2b45-4cb0-acca-ce167e8b7c32	756_1	FALSE	34596	256	0.427	27	60	515.8	30948	0.89	57	563.368	32112	0.9282
AFVG_250M1023	250	fb293559-2086-4e21-8169-d829f897f626	758_5	FALSE	37090	246	0.42	22	81	399.81	32385	0.87	65	519.462	33765	0.910353
AFVG_250M1024	250	c5bf1831-8c0c-4ebb-9360-e0628ece0988	758_6	FALSE	36907	257	0.421	79	75	432.72	32454	0.88	56	616.071	34500	0.934782
AFVG_250M1025	250	d674b3d4-ebea-4f7d-abe2-87dbd9762451	75_1	FALSE	34845	1183	0.377	27	51	561	28611	0.82	50	616.68	30834	0.88489
AFVG_250M1026	250	76f5d25a-0adf-48e8-abd4-205a199d6cf6	75_2	FALSE	34723	857	0.375	11	67	427.57	28647	0.83	58	530.431	30765	0.886012
AFVG_250M1027	250	ea4ff4c6-9e20-470d-a995-5733ba102376	760_2	FALSE	69760	4345	0.368	23	120	532.55	63906	0.92	101	644.495	65094	0.933114
AFVG_250M1028	250	278cee48-9a2c-42e6-bd72-2a40a15a2770	761_3	FALSE	38386	122	0.426	26	48	736.19	35337	0.92	47	753.447	35412	0.922524
AFVG_250M1029	250	a518b4a6-4da6-4e18-992c-90538782873b	761_4	FALSE	38198	130	0.426	47	46	764.61	35172	0.92	41	866.268	35517	0.929813
AFVG_250M1030	250	04296b09-6e8d-4800-9058-fa64add455d3	766_2	TRUE	35701	2034	0.561	37	62	525.39	32574	0.91	61	543.197	33135	0.928125
AFVG_250M1031	250	be7b475f-ea0f-4e45-9996-1b78c2e3551a	767_1	FALSE	41294	159	0.316	11	69	529.65	36546	0.88	54	729.222	39378	0.953601
AFVG_250M1032	250	a55f3db0-9395-4d59-aae5-039fd3bb8ce0	76_2	FALSE	40249	309	0.445	13	77	449.18	34587	0.86	55	672.273	36975	0.918656
AFVG_250M1033	250	ae11273b-c318-4efd-9636-d004ca02b577	770_1	FALSE	40072	362	0.582	26	56	596.25	33390	0.83	55	661.255	36369	0.907591
AFVG_250M1034	250	dda44f98-1fcb-43f1-a2d3-3d0265117d4b	771_1	FALSE	36800	384	0.515	36	54	559.61	30219	0.82	51	630.647	32163	0.873995
AFVG_250M1035	250	32c8d715-1069-4885-bf87-cf1d0673fa0b	771_3	FALSE	36694	385	0.515	23	64	467.02	29889	0.81	52	600.058	31203	0.850357
AFVG_250M1036	250	656eb144-1103-4e70-b518-70d8a6ab5758	772_1	FALSE	42700	214	0.467	32	63	631.29	39771	0.93	57	708.737	40398	0.946089
AFVG_250M1037	250	6166939f-5840-4dcf-aa9e-34da2efb08eb	773_2	FALSE	36628	150	0.314	56	61	545.46	33273	0.91	57	583.263	33246	0.907666
AFVG_250M1038	250	1a4cc66d-ae23-4921-82fd-26c58ed0b325	774_2	FALSE	41276	160	0.446	34	68	592.46	40287	0.97	67	601.433	40296	0.976257
AFVG_250M1039	250	f9c1578d-fd06-457a-91ec-5169507705af	774_3	FALSE	41269	157	0.446	31	70	571.67	40017	0.97	69	579.478	39984	0.968863
AFVG_250M1040	250	8988fb16-67ba-4a0d-915a-fefd815384bc	776_4	FALSE	41502	304	0.487	68	56	655.39	36702	0.88	56	667.286	37368	0.90039
AFVG_250M1041	250	ea223724-559a-4f90-ba21-1cf020a37aae	777_2	FALSE	37376	230	0.51	14	51	628.53	32055	0.86	44	769.5	33858	0.905875
AFVG_250M1042	250	cf95a346-a819-46a6-8a78-daa179a569c1	77_2	FALSE	40257	212	0.336	36	74	482.15	35679	0.89	71	517.31	36729	0.912363
AFVG_250M1043	250	5ffdce1d-175c-4a1b-bcd9-e3cc5120433a	782_1	FALSE	40994	464	0.483	16	65	550.06	35754	0.87	59	631.932	37284	0.909499
AFVG_250M1044	250	6adb63d4-7264-44d1-879e-f7df0ee0bbb5	785_1	FALSE	41134	213	0.33	26	62	557.27	34551	0.84	55	665.618	36609	0.889994
AFVG_250M1045	250	1046b2ac-f41f-4956-be2d-ebe9babe87d8	786_2	FALSE	42696	179	0.462	92	53	756.62	40101	0.94	51	789.765	40278	0.943367
AFVG_250M1046	250	070a1faf-5593-4e8b-bde1-dac31b0b8979	786_4	FALSE	42693	179	0.461	57	54	745.56	40260	0.94	53	765.792	40587	0.950671
AFVG_250M1047	250	996a310c-2eb9-4bd0-bbb0-b7ab4b3def06	787_2	FALSE	41802	177	0.327	20	89	425.16	37839	0.9	86	463.57	39867	0.95371
AFVG_250M1048	250	4478ee71-45ab-4c84-9f06-795f6b8494e6	788_1	FALSE	55935	483	0.482	36	78	646.54	50430	0.9	68	759.529	51648	0.923357
AFVG_250M1049	250	a8713fee-990d-4df8-8802-e1b105fa93f7	788_2	FALSE	54835	476	0.483	19	81	601.04	48684	0.89	75	688.88	51666	0.942208
AFVG_250M1050	250	4fd9fb69-e5e7-488b-a7e9-edfe56b9a2f9	789_1	FALSE	39823	233	0.323	28	83	442.52	36729	0.92	71	533.535	37881	0.951234
AFVG_250M1051	250	bc201126-6455-4226-ae4b-538ef71806ad	78_1	FALSE	39142	246	0.331	34	57	623.16	35520	0.91	56	648	36288	0.927086
AFVG_250M1052	250	43e03d21-8dd6-4c9c-a31d-6a581eeb02f2	790_3	FALSE	41002	465	0.464	22	53	683.72	36237	0.88	49	771.367	37797	0.921833
AFVG_250M1053	250	88104f22-93fe-49d4-878c-96ac7851322a	793_2	FALSE	44088	345	0.538	40	67	613.34	41094	0.93	58	718.397	41667	0.945087
AFVG_250M1054	250	41f124b0-0497-4f21-bcbf-a2473b17c845	794_2	FALSE	43933	374	0.54	11	80	509.29	40743	0.93	65	630.831	41004	0.93333
AFVG_250M1055	250	a2340f69-fbcc-43d3-8bad-7f23a058586b	795_1	FALSE	46795	232	0.583	14	70	601.11	42078	0.9	61	701.213	42774	0.914072
AFVG_250M1056	250	d306f154-2547-476b-976c-419ce60579ab	796_1	FALSE	46122	232	0.582	60	65	627.51	40788	0.88	65	657.415	42732	0.926499
AFVG_250M1057	250	b33839d1-ca0b-4f9d-823a-dacbbf837390	796_3	FALSE	47108	226	0.582	35	64	623.02	39873	0.85	59	733.78	43293	0.919016
AFVG_250M1058	250	6f655751-4229-4306-a9eb-d6da723229b4	797_1	FALSE	41263	281	0.574	30	55	686.73	37770	0.91	54	699.722	37785	0.915711
AFVG_250M1059	250	2bb08972-fbc1-4b79-8485-8f5f7ee383a6	799_3	FALSE	34277	309	0.548	59	58	548.74	31827	0.93	54	615.778	33252	0.970097
AFVG_250M1060	250	13e79670-6549-4e10-afc5-d44da63b304f	800_1	FALSE	34892	299	0.548	27	58	536.02	31089	0.89	56	563.571	31560	0.904505
AFVG_250M1061	250	f697f564-d0cd-44f3-b88c-ec928683572a	803_2	FALSE	46600	218	0.545	43	59	733.47	43275	0.93	53	807.453	42795	0.918348
AFVG_250M1062	250	f6459e60-83f0-4762-8549-582b4a781846	803_6	FALSE	46577	203	0.546	49	57	747.11	42585	0.91	51	846.706	43182	0.92711
AFVG_250M1063	250	c2bc094b-a786-421d-9ee7-3afed4e2e0ba	803_7	FALSE	46568	208	0.543	13	74	545.68	40380	0.87	69	589.348	40665	0.873239
AFVG_250M1064	250	84b5b925-fed8-460c-8b15-122ed94d1f92	807_1	FALSE	39447	380	0.527	11	62	444.29	27546	0.7	58	532.293	30873	0.782645
AFVG_250M1065	250	36ed3a41-468d-40f5-8f9c-b548788c3349	808_12	FALSE	38606	325	0.519	57	53	591.34	31341	0.81	54	591.444	31938	0.827281
AFVG_250M1066	250	ff644a05-bbf6-42d4-b6b5-cb3083b19309	808_13	FALSE	39601	312	0.52	27	64	470.06	30084	0.76	64	480.609	30759	0.776723
AFVG_250M1067	250	d00c74ca-f6a8-47e6-9795-f9eebc9859d3	808_14	FALSE	40020	291	0.521	21	57	557.21	31761	0.79	55	567	31185	0.779235
AFVG_250M1068	250	9bc71635-8817-4594-8c3a-e8a29669a754	808_15	FALSE	39389	280	0.521	64	53	603.91	32007	0.81	53	611.774	32424	0.823174
AFVG_250M1069	250	156aeda5-3676-48e3-9eb1-f93a9366bc22	808_16	FALSE	39131	312	0.52	61	47	661.15	31074	0.79	49	664.469	32559	0.832051
AFVG_250M1070	250	448efe92-8081-4b6e-b63a-49065959bf8f	808_17	FALSE	39100	345	0.521	63	50	641.94	32097	0.82	51	639.176	32598	0.833708
AFVG_250M1071	250	e9fb1be5-baec-4efe-bbbc-7a96a72d30b8	808_18	FALSE	38895	380	0.52	11	55	522.33	28728	0.74	55	532.582	29292	0.753105
AFVG_250M1072	250	031dba9e-67b9-496d-bde2-4f365cddb577	809_2	FALSE	41037	167	0.447	26	68	584.82	39768	0.97	66	608.864	40185	0.979238
AFVG_250M1073	250	88fc254a-1670-4700-a319-f96fa852c41a	810_1	FALSE	40575	191	0.446	14	70	541.84	37929	0.93	66	584.727	38592	0.951128
AFVG_250M1074	250	9c67e2ec-f2d1-47df-84dc-dd4e1acd74cc	819_4	FALSE	41291	274	0.576	83	58	632.95	36711	0.89	54	699.722	37785	0.91509
AFVG_250M1075	250	d0ea19e7-b804-4cf8-9f86-449976bff9bb	820_2	FALSE	41460	274	0.576	35	55	676.91	37230	0.9	52	719.712	37425	0.902677
AFVG_250M1076	250	3bd0179f-097f-4afb-a23a-60d2fccbd958	823_1	FALSE	40501	461	0.351	91	50	746.76	37338	0.92	51	735.118	37491	0.925681
AFVG_250M1077	250	f700914d-cdbf-4bae-8556-1832fe6dd6c4	823_2	FALSE	40392	458	0.352	15	67	530.87	35568	0.88	68	529.235	35988	0.890969
AFVG_250M1078	250	e5dde655-64e7-4ce9-93af-b4a656567dcc	823_4	FALSE	40218	487	0.352	57	52	709.27	36882	0.92	53	701.491	37179	0.924437
AFVG_250M1079	250	aa058b3b-b83b-4f3e-8ca9-52f09ca523a5	823_5	FALSE	40237	487	0.353	71	50	741.12	37056	0.92	51	732.529	37359	0.928474
AFVG_250M1080	250	a8d17429-cd4d-4c74-ad37-e5af9bca43d0	828_2	FALSE	41967	185	0.331	41	79	497.32	39288	0.94	81	495.963	40173	0.957252
AFVG_250M1081	250	420f0c1f-49cd-4635-a81e-381cfc1708ba	831_1	FALSE	40072	309	0.393	14	72	452.5	32580	0.81	72	458.333	33000	0.823518
AFVG_250M1082	250	c0a679ce-77ac-48bd-8afe-71d75736c64a	831_2	FALSE	40104	324	0.394	50	62	570.39	35364	0.88	57	632.158	36033	0.898489
AFVG_250M1083	250	1616c609-8bf0-4ada-9d8f-f41dd6f63ff1	831_3	FALSE	39595	325	0.394	26	61	565.38	34488	0.87	57	602.632	34350	0.867534
AFVG_250M1084	250	6329e003-43fe-4897-9919-a68022b4dd5b	832_1	TRUE	35735	1314	0.592	11	61	499.67	30480	0.85	44	735.341	32355	0.905415
AFVG_250M1085	250	997dbabc-1e47-4350-b479-9faa4ec13512	834_2	FALSE	43456	227	0.448	34	66	625.86	41307	0.95	62	673.645	41766	0.96111
AFVG_250M1086	250	b565ec62-675b-481b-9ee8-47bfbc04cf23	835_1	FALSE	37871	293	0.57	40	52	700.15	36408	0.96	52	700.846	36444	0.962319
AFVG_250M1087	250	abed15f8-8fa9-4d3d-a224-3e0ffa0c52f7	836_2	FALSE	53763	305	0.428	14	73	637.36	46527	0.86	69	697.609	48135	0.895318
AFVG_250M1088	250	133c121f-3ec5-4d40-9608-642ab3f66cce	836_3	FALSE	54205	305	0.428	25	77	637.48	49086	0.91	75	660.12	49509	0.913366
AFVG_250M1089	250	5a592989-ad5b-454e-a312-9c9ba85c76b1	836_5	FALSE	53910	308	0.428	36	78	614.46	47928	0.89	79	611.165	48282	0.895604
AFVG_250M1090	250	c15895b7-8c9c-422a-b256-958f93969b63	836_6	FALSE	53960	313	0.427	30	73	668.26	48783	0.9	71	709.563	50379	0.933636
AFVG_250M1091	250	06d3635b-f57a-45e4-838a-2c2c6cc9fe61	836_7	FALSE	54630	304	0.427	15	89	557.7	49635	0.91	75	674.24	50568	0.925645
AFVG_250M1092	250	16b164e4-ec29-435e-b615-a607a9ae5147	836_8	FALSE	54597	305	0.428	35	82	604.72	49587	0.91	80	627.788	50223	0.919886
AFVG_250M1093	250	dfc757c4-eba7-4b05-9883-902ff2241293	837_1	FALSE	45905	359	0.331	10	115	327.08	37614	0.82	95	439.421	41745	0.909378
AFVG_250M1094	250	e55fd9a1-1318-40d0-b9fc-790d29e1182d	841_1	FALSE	37469	1880	0.471	44	48	679.25	32604	0.87	44	750.886	33039	0.881769
AFVG_250M1095	250	103a4b89-ce41-434e-9076-105db5233861	845_1	FALSE	41910	349	0.456	12	66	580.5	38313	0.91	57	681.789	38862	0.927273
AFVG_250M1096	250	380045bf-c54c-4ea8-8e12-fdcc490b284f	847_3	FALSE	38484	378	0.378	57	52	667.73	34722	0.9	51	681.176	34740	0.902713
AFVG_250M1097	250	ddf2f5c9-fd84-443d-a0fa-11db0b2df0c7	848_13	FALSE	39150	400	0.378	38	50	695.58	34779	0.89	50	705.96	35298	0.901609
AFVG_250M1098	250	40b76ede-ba10-43de-85b5-d576f6e9cb7a	848_5	FALSE	39425	381	0.377	139	46	775.63	35679	0.9	46	775.63	35679	0.904984
AFVG_250M1099	250	775a7682-a320-4663-b0b9-f845831476c7	848_6	FALSE	39427	400	0.377	62	49	723.8	35466	0.9	49	723.796	35466	0.899536
AFVG_250M1100	250	061403ac-ebce-4a32-8cbf-437761d6ab2f	848_8	FALSE	39646	382	0.377	10	63	519.14	32706	0.82	63	538.429	33921	0.855597
AFVG_250M1101	250	4bc369ea-017d-456b-bf7f-a47ea5153efe	853_2	FALSE	39662	435	0.429	14	70	489.21	34245	0.86	62	556.161	34482	0.869396
AFVG_250M1102	250	07ad7efd-6ae7-4037-bc24-7b21c785ff0e	859_2	FALSE	40019	268	0.402	20	69	508.43	35082	0.88	65	565.431	36753	0.918389
AFVG_250M1103	250	d825c7c0-510a-4546-ae84-6f6ec3cbbb6e	85_1	FALSE	40553	272	0.489	18	66	552.91	36492	0.9	64	596.344	38166	0.941139
AFVG_250M1104	250	7e498d71-0acb-4c4f-a676-a4803eec71f2	860_2	TRUE	38763	2260	0.384	45	66	543.64	35880	0.93	68	538.897	36645	0.94536
AFVG_250M1105	250	1ccd0035-f73a-46e5-b9a9-f174094f2ab8	865_2	FALSE	45808	405	0.46	23	55	766.36	42150	0.92	45	954.867	42969	0.938024
AFVG_250M1106	250	057a5bab-4f22-41a6-9a55-46c08087b08e	869_1	FALSE	36343	277	0.467	13	66	438	28908	0.8	51	639.941	32637	0.898027
AFVG_250M1107	250	596486b8-978d-4649-a742-b9dededde710	870_1	FALSE	38039	361	0.404	17	85	292.34	24849	0.65	49	697.776	34191	0.898841
AFVG_250M1108	250	1a2307ba-a992-4afb-be79-74322d88a941	872_1	FALSE	40092	196	0.425	38	88	368.86	32460	0.81	66	551.773	36417	0.908336
AFVG_250M1109	250	b11e9df7-151e-4b5f-b6b2-dee5e32b8df9	872_2	FALSE	39886	194	0.424	10	90	336.9	30321	0.76	77	428.571	33000	0.827358
AFVG_250M1110	250	20352262-261b-47a3-9ba1-fdc2862320ab	875_1	FALSE	40961	236	0.409	27	66	548.73	36216	0.88	63	602.143	37935	0.926125
AFVG_250M1111	250	5ba59ada-008e-4bad-a59f-62bc5eb415f3	876_1	FALSE	41071	250	0.404	13	77	453.23	34899	0.85	75	486.8	36510	0.888948
AFVG_250M1112	250	24705148-d02a-46b5-8b24-9e1154a9426a	877_1	FALSE	43898	377	0.622	34	72	575.08	41406	0.94	52	764.25	39741	0.905303
AFVG_250M1113	250	3e57fa31-f6f2-416a-9f5c-252ddc6bfd33	87_1	FALSE	41202	297	0.498	10	75	436.48	32736	0.79	68	537.529	36552	0.887141
AFVG_250M1114	250	9d059cc5-70f4-4c2e-8855-732de9e0c8f6	880_1	FALSE	38815	369	0.39	36	55	610.69	33588	0.87	51	698.824	35640	0.918202
AFVG_250M1115	250	7882b879-acd7-4484-a3f3-3ebb1a42bc2c	881_1	FALSE	39222	461	0.393	10	64	497.39	31833	0.81	47	727.66	34200	0.87196
AFVG_250M1116	250	3ea4cd50-245e-420c-9bd3-94b286cc764b	882_2	FALSE	37549	191	0.387	35	48	734.38	35250	0.94	45	792.2	35649	0.949399
AFVG_250M1117	250	e40af532-02d7-4674-8868-fe36602bb4c5	883_1	FALSE	61056	173	0.369	30	101	559.66	56526	0.93	94	626.426	58884	0.964426
AFVG_250M1118	250	fac8e922-2781-4df3-9f93-47dc90761ad9	885_1	FALSE	49929	126	0.347	27	79	577.59	45630	0.91	68	691.015	46989	0.941116
AFVG_250M1119	250	ddd67770-84ef-4c3a-bf87-3720dc46d50b	887_4	FALSE	40776	249	0.456	62	61	635.85	38787	0.95	59	653.949	38583	0.946218
AFVG_250M1120	250	b4ca2329-3f3a-479b-bbe6-6d34bf7534c1	889_1	FALSE	40954	301	0.511	13	64	595.88	38136	0.93	61	638.607	38955	0.951189
AFVG_250M1121	250	ac4148b7-4061-4ea7-9d0a-92ed9661bfa0	890_2	FALSE	41528	235	0.483	12	67	543.72	36429	0.88	64	588.328	37653	0.906689
AFVG_250M1122	250	ae053e11-09f0-4910-bb4e-3cd11db6d86a	891_1	FALSE	42560	121	0.451	33	52	779.02	40509	0.95	50	831.66	41583	0.977044
AFVG_250M1123	250	833713c2-e387-41da-ad8d-d70e99738f3d	892_2	TRUE	47685	2491	0.542	51	51	879.12	44835	0.94	47	978	45966	0.963951
AFVG_250M1124	250	eaf6db84-a96f-42cf-90f6-0c68524ddd31	896_4	FALSE	36682	274	0.41	31	60	526.3	31578	0.86	54	616.556	33294	0.907639
AFVG_250M1125	250	a5d08ca9-c174-4582-94b2-95d44772049c	897_3	FALSE	38620	298	0.438	34	56	628.45	35193	0.91	52	671.135	34899	0.903651
AFVG_250M1126	250	6457c2f3-9f57-402a-837e-d8bee88a2018	897_4	FALSE	38868	300	0.439	34	54	661.11	35700	0.92	55	659.945	36297	0.933853
AFVG_250M1127	250	7d2499f0-d0ca-4f26-8071-6390f113d69b	89_5	FALSE	37062	264	0.428	86	70	450.64	31545	0.85	54	606.667	32760	0.883924
AFVG_250M1128	250	faaa7036-3d52-4683-90f5-b55002f02790	89_6	FALSE	36930	264	0.428	35	75	428.96	32172	0.87	60	528.55	31713	0.858733
AFVG_250M1129	250	6d01f0f7-f7c9-4413-985e-7e9149bc62a9	901_1	FALSE	35030	537	0.527	51	51	582.47	29706	0.85	48	632.625	30366	0.866857
AFVG_250M1130	250	175de0f2-f527-422d-b307-9d982e6dc2a6	904_1	FALSE	34560	1152	0.33	34	58	538.34	31224	0.9	51	635.824	32427	0.938281
AFVG_250M1131	250	508f23d1-809c-4bef-9eaa-67b9c3b794f5	905_1	FALSE	40508	308	0.517	18	54	580.67	31356	0.77	53	611.66	32418	0.800286
AFVG_250M1132	250	0013a84a-2829-4d2f-b176-8b6a60c7e9df	909_1	FALSE	42559	416	0.495	17	55	656.73	36120	0.85	54	713.778	38544	0.90566
AFVG_250M1133	250	a9798387-6b57-46a5-81c2-c6c05f6ef10c	90_1	FALSE	40550	160	0.443	11	76	497.64	37821	0.93	74	515.757	38166	0.941208
AFVG_250M1134	250	12088be2-96f8-437a-87b1-db57e34c0743	910_1	FALSE	38379	346	0.491	28	59	563.34	33237	0.87	55	621.709	34194	0.890956
AFVG_250M1135	250	944e5101-4fcf-473b-9c6a-0c169898d947	914_3	FALSE	40277	107	0.522	96	47	809.62	38052	0.94	47	816.064	38355	0.95228
AFVG_250M1136	250	450ac31b-08d7-4d54-af23-c48939d35fd6	914_4	FALSE	40262	107	0.522	37	57	670.63	38226	0.95	53	723.736	38358	0.95271
AFVG_250M1137	250	75eb6b39-5641-4a9a-90b0-360864bae23f	916_1	FALSE	44911	2111	0.431	11	87	419.79	36522	0.81	76	520.737	39576	0.88121
AFVG_250M1138	250	1584ce77-0738-4301-8305-635c1f3e4d97	919_2	FALSE	42388	411	0.327	29	84	464.36	39006	0.92	81	491.667	39825	0.939535
AFVG_250M1139	250	79ab4462-3118-442c-aeee-06b4396661e8	91_10	FALSE	41131	167	0.444	59	67	591.36	39621	0.96	67	590.373	39555	0.961683
AFVG_250M1140	250	1b302a1a-aba0-4dab-a4cd-addfc2ba053a	91_4	FALSE	40891	163	0.442	33	70	564	39480	0.96	71	555.634	39450	0.96476
AFVG_250M1141	250	21827362-6496-4936-9ff3-e478f9d99cab	91_7	FALSE	40803	166	0.444	89	65	605.86	39381	0.96	66	600.818	39654	0.97184
AFVG_250M1142	250	ff05e1aa-3890-4588-848e-22cd4ec1946f	920_1	FALSE	39159	292	0.501	62	49	715.22	35046	0.89	43	841.047	36165	0.923542
AFVG_250M1143	250	9ddf088b-58b5-4ab5-b00a-d4230859224c	923_1	FALSE	43635	302	0.331	15	94	415.24	39033	0.89	82	496.646	40725	0.93331
AFVG_250M1144	250	f70600a1-e9b6-42f6-af44-0ddd2f371da8	924_5	FALSE	39310	224	0.418	56	54	661.11	35700	0.91	53	676.528	35856	0.912134
AFVG_250M1145	250	ca30c2dc-66cf-4ec1-819e-45be5fecb0a4	924_6	FALSE	39601	247	0.417	57	56	648.64	36324	0.92	54	671.222	36246	0.91528
AFVG_250M1146	250	54fb2ce7-6ca4-4a92-9508-3e571294d0e3	926_5	FALSE	37162	2151	0.451	29	82	385.54	31614	0.85	69	482.913	33321	0.896642
AFVG_250M1147	250	4ffc81bf-16f3-44af-8453-a025ff66e8f3	926_9	FALSE	37406	2697	0.451	34	68	473.6	32205	0.86	55	648.109	35646	0.952949
AFVG_250M1148	250	272b0908-8c99-4439-aa62-ecfb733c4e4e	927_1	FALSE	42761	498	0.331	27	86	444.03	38187	0.89	87	446	38802	0.907416
AFVG_250M1149	250	d84be649-fb64-4807-aa27-fa2690c979e7	927_2	FALSE	42979	498	0.332	18	91	427.19	38874	0.9	90	437.9	39411	0.916983
AFVG_250M1150	250	5e1ea5cc-a033-438d-8e3b-351f9f2365a1	928_1	FALSE	37636	316	0.416	31	57	600.11	34206	0.91	55	637.145	35043	0.931103
AFVG_250M1151	250	f5863c8d-b926-445c-9110-fd2b068dfe70	92_2	FALSE	39660	225	0.428	74	55	684	37620	0.95	54	698.944	37743	0.951664
AFVG_250M1152	250	321ea1f7-8360-409e-85fc-555007490ebc	92_3	FALSE	39745	227	0.428	31	55	683.84	37611	0.95	52	722.019	37545	0.944647
AFVG_250M1153	250	effca041-cb73-4659-af4e-ceb3f677deb4	92_6	FALSE	39926	224	0.428	24	53	700.92	37149	0.93	54	698.833	37737	0.945174
AFVG_250M1154	250	f15f153a-f1a1-4d64-b8e8-92e83b13c24c	931_1	FALSE	43130	274	0.439	16	79	494.24	39045	0.9	73	530.507	38727	0.897913
AFVG_250M1155	250	cbdfea9a-777e-4c22-bb06-8741b0f2768f	935_3	FALSE	39736	278	0.437	28	54	647.61	34971	0.88	54	649.278	35061	0.882349
AFVG_250M1156	250	fa3e06e4-c248-458f-b1d3-9f6f9a8fcfbc	935_4	FALSE	40315	278	0.436	65	51	727.82	37119	0.92	48	772.125	37062	0.91931
AFVG_250M1157	250	571bcb4f-d556-4480-a7f0-fc4f9012000c	938_1	FALSE	40144	142	0.335	15	59	616.63	36381	0.91	50	743.16	37158	0.925618
AFVG_250M1158	250	1adffa10-2b09-4937-8780-babc3417392b	939_3	FALSE	38426	236	0.535	39	53	654.06	34665	0.9	51	686.235	34998	0.91079
AFVG_250M1159	250	15633642-ef90-4158-931d-899b5b617c84	93_1	FALSE	41629	191	0.44	19	72	503.21	36231	0.87	57	675.368	38496	0.92474
AFVG_250M1160	250	4d8ba2ad-bb56-481e-9ad9-24d8f560ec2d	941_1	FALSE	49306	261	0.335	15	93	463.84	43137	0.87	67	698.418	46794	0.949053
AFVG_250M1161	250	b350113d-fd39-44da-a297-961c3d65f4d2	942_1	FALSE	39876	138	0.388	36	52	704.65	36642	0.92	49	768.857	37674	0.944779
AFVG_250M1162	250	05b3b500-92bb-4093-87a4-a6ba414aa115	94_1	FALSE	37264	328	0.432	62	46	737.67	33933	0.91	47	729.319	34278	0.919869
AFVG_250M1163	250	5282ae0a-2d06-435d-a0d6-3ebff5ce8c55	94_2	FALSE	37256	321	0.432	39	46	741.98	34131	0.92	45	757.067	34068	0.91443
AFVG_250M1164	250	27055eca-30d0-48d8-bcc1-3ac381b46a9a	950_1	FALSE	61895	114	0.376	20	83	721.63	59895	0.97	81	746.259	60447	0.976606
AFVG_250M1165	250	a7d4b375-31ea-458a-a78b-df4afc5eccd5	952_6	FALSE	39342	351	0.376	67	54	655.67	35406	0.9	52	680.019	35361	0.89881
AFVG_250M1166	250	6b390029-1f9b-443c-8d82-4a9835c8ca5c	952_7	FALSE	39331	347	0.376	26	52	681.98	35463	0.9	51	699.294	35664	0.906766
AFVG_250M1167	250	a92b6fa5-a421-43fb-89be-c35bba787a3d	953_2	FALSE	44465	353	0.332	13	96	401.56	38550	0.87	87	454.966	39582	0.890183
AFVG_250M1168	250	4c60f913-988c-483e-9f07-3b9db150335d	953_3	FALSE	44341	383	0.331	13	107	349.07	37350	0.84	102	381.265	38889	0.877044
AFVG_250M1169	250	647c4963-39bb-4624-8b37-15f2a5042437	955_10	FALSE	40558	227	0.495	37	64	576.84	36918	0.91	64	576.844	36918	0.910252
AFVG_250M1170	250	1ca464ae-b13a-4b0e-99b5-4c1c2a40f1bc	955_11	FALSE	40808	227	0.496	21	58	629.48	36510	0.89	58	630.259	36555	0.89578
AFVG_250M1171	250	f2b82448-ea22-4515-a3fe-ad197901ebc4	955_12	FALSE	40359	228	0.498	12	66	501.95	33129	0.82	62	538.984	33417	0.827994
AFVG_250M1172	250	15bd2dd1-5728-4b07-9ab6-a4bcee1bfb06	955_13	FALSE	40450	228	0.496	35	60	603.85	36231	0.89	57	635.737	36237	0.895847
AFVG_250M1173	250	c6a9fc41-04cc-42a9-bdb8-141209686eed	955_14	FALSE	39977	227	0.497	28	60	609.1	36546	0.91	59	620.847	36630	0.916277
AFVG_250M1174	250	1a063886-c702-4e56-b9b8-61130ca36813	955_3	FALSE	40391	227	0.495	18	55	654.44	35994	0.89	56	655.661	36717	0.909039
AFVG_250M1175	250	26d23712-9942-4301-9cbb-5a838142f8cd	955_7	FALSE	39743	227	0.497	35	62	587.61	36432	0.92	59	617.339	36423	0.916463
AFVG_250M1176	250	cb696bcb-da20-419f-a03a-8e00a7af9cd2	955_9	FALSE	40103	227	0.497	26	58	634.19	36783	0.92	58	634.241	36786	0.917288
AFVG_250M1177	250	f7370436-2fde-442f-9cc5-21dfe3978c4a	958_3	TRUE	47731	2667	0.543	37	56	839.14	46992	0.98	52	906.692	47148	0.987786
AFVG_250M1178	250	7e844bed-72b2-4514-88d4-1ba36270bb12	959_3	FALSE	39334	206	0.591	86	46	772.83	35550	0.9	43	820.186	35268	0.896629
AFVG_250M1179	250	4fbae2d7-9da9-40bc-8041-b53e70b86c5a	95_1	FALSE	36061	246	0.47	50	57	532.68	30363	0.84	50	664.5	33225	0.921355
AFVG_250M1180	250	f4cb61fc-d6ad-4e2b-a6bf-9d4a84af0836	963_1	FALSE	41702	271	0.559	32	80	450.3	36024	0.86	54	661.611	35727	0.856722
AFVG_250M1181	250	b4a80176-9c0c-4af0-ae90-4b0cc177f876	964_1	FALSE	61070	127	0.377	52	85	683.05	58059	0.95	81	725.444	58761	0.962191
AFVG_250M1182	250	618a0ece-47fc-4ded-a1ab-9f67e4dd199b	965_6	FALSE	42558	451	0.505	69	67	581.24	38943	0.91	61	649.377	39612	0.930777
AFVG_250M1183	250	03460e43-35e2-49a0-8556-3437b9762050	966_1	FALSE	44862	1347	0.394	21	54	746.11	40290	0.9	51	806.824	41148	0.917213
AFVG_250M1184	250	3bcad44f-f572-4937-bb7f-f42efd44da58	966_3	FALSE	44673	1323	0.394	17	54	731	39474	0.88	51	783.118	39939	0.89403
AFVG_250M1185	250	e3f8bcdb-8ccc-4fdb-9535-b1faf6ff1c37	967_1	FALSE	39505	1050	0.446	21	53	659.72	34965	0.88	44	810.818	35676	0.903076
AFVG_250M1186	250	f0e39bbd-26ab-41cb-9280-61de60c7004e	968_2	FALSE	46597	864	0.519	19	53	808.53	42852	0.92	45	974.867	43869	0.941455
AFVG_250M1187	250	2009c185-4450-40ee-abb1-0422e2c1f217	96_1	FALSE	39913	149	0.487	28	58	662.28	38412	0.96	54	708.389	38253	0.95841
AFVG_250M1188	250	d3a22f5e-a4a4-4a55-af4a-e46987b6ea4b	973_1	FALSE	45268	605	0.319	16	76	534.67	40635	0.9	67	630.493	42243	0.933176
AFVG_250M1189	250	e1e8b7e0-ec7d-4d8b-9bd9-eb679bf1235c	974_1	FALSE	53316	167	0.366	23	78	629.35	49089	0.92	73	696.329	50832	0.95341
AFVG_250M1190	250	d5f07a7e-4895-48d0-9595-3f5791242a9d	979_3	FALSE	60668	385	0.473	14	96	552.56	53046	0.87	89	613.888	54636	0.900574
AFVG_250M1191	250	ddf167e0-7b8f-440d-b4b5-986ee2458db5	979_4	FALSE	60366	405	0.474	38	82	680.82	55827	0.92	79	714.797	56469	0.935444
AFVG_250M1192	250	e86c9d27-88b0-4cd3-b662-cdbeb24c02c9	982_2	FALSE	38943	247	0.437	10	72	474.42	34158	0.88	47	770.553	36216	0.929975
AFVG_250M1193	250	dee26f6c-7880-4fa8-bbd2-36fa155e39a0	984_3	FALSE	40268	265	0.43	17	72	476.21	34287	0.85	53	704.038	37314	0.926642
AFVG_250M1194	250	cf12cc71-464a-4143-996f-6f2a2a94e8c9	986_1	FALSE	40200	182	0.348	11	65	526.89	34248	0.85	55	673.745	37056	0.921791
AFVG_250M1195	250	930bfd3e-f0de-4fa3-9484-6787ffe21a93	988_1	FALSE	37541	264	0.568	31	49	651.31	31914	0.85	45	745.2	33534	0.893263
AFVG_250M1196	250	b95271d7-bf9f-4caa-9df1-410ab5ede51c	989_1	FALSE	60199	205	0.322	22	103	529.11	54498	0.9	88	649.773	57180	0.94985
AFVG_250M1197	250	d34b432c-4a22-4ef2-924b-26f571c31e4c	98_15	FALSE	39827	209	0.437	12	70	499.93	34995	0.88	68	525	35700	0.896377
AFVG_250M1198	250	8b330846-b044-4e47-9981-29fbf1431387	98_23	FALSE	40003	209	0.436	53	58	644.79	37398	0.93	58	644.793	37398	0.93488
AFVG_250M1199	250	06c660cc-804a-4edb-94a4-637f9dda081f	98_26	FALSE	40010	209	0.436	115	55	699.44	38469	0.96	53	719.717	38145	0.953387
AFVG_250M1200	250	73e9ef1c-0612-4d7e-b190-583b7cf064af	98_31	FALSE	39962	216	0.436	29	56	680.04	38082	0.95	55	687.545	37815	0.946274
AFVG_250M1201	250	55c3d6ef-5ec7-40d6-919b-4f50d740a3f2	990_3	FALSE	55531	359	0.354	58	70	731.36	51195	0.92	69	750.043	51753	0.931966
AFVG_250M1202	250	ce619ee4-403f-4718-a835-37b27d29d8f6	992_1	FALSE	39409	175	0.443	15	64	578.02	36993	0.94	57	665.684	37944	0.962826
AFVG_250M1203	250	3c7fd960-1742-43e8-b692-9de08fd29a3c	995_1	FALSE	38397	253	0.591	17	64	509.58	32613	0.85	60	568.2	34092	0.887882
AFVG_250M1204	250	fb019b0c-924d-40bb-b0b2-2a7caf47ca3c	996_1	FALSE	43787	118	0.378	29	66	622.95	41115	0.94	61	682.525	41634	0.95083
AFVG_250M1205	250	d0452fd6-8ed2-4d60-9acc-76fe1801eebe	9_1	FALSE	38463	208	0.423	48	64	574.45	36765	0.95	61	606.738	37011	0.962249

## Sheet: README
Supplementary_Table_1.xlsx Statistics for 1,864 polished AFVGs obtained from three seawater samples.
Details on genome characteristics, direct terminal repeat (DTR) size, GC content, and coding sequence (CDS) information for each polished draft genome are indicated. Each genome was polished from the specified sequencing read.
