# Supplementary material for: Assembly-free single-molecule sequencing recovers complete virus genomes from natural microbial communities
Source: HighWire-hosted journal article supplement (doi:10.1101/gr.251686.119), 2020-02-19
Supplement: Supplementary_Table_S2.xlsx [file Supplementary_Table_S2.xlsx]

## Sheet: all_concats.pilon.info_table
								Nanopore-only					Nanopore + Pilon
Accession	Depth (m)	Read	Length (bp)	Repeat size (bp)	# repeats	ANI cluster ID	GC content	# polishing reads	# CDS	CDS mean length (bp)	CDS length sum (bp)	CDS genome fraction	# CDS	CDS mean length (bp)	CDS length sum (bp)	CDS genome fraction
AFPP_25M1	25	a4f7f839-12d1-4c26-87a5-aa8e15294bf7	33142	5545	5.97024	555_1	0.322	10	77	320.1	24648	0.74	53	535.358	28374	0.856134
AFPP_117M1	117	49bb3c35-8c85-4cd0-9e52-20cb0ccfc396	41781	9238.5	4.52411	101_2	0.337	10	70	438.69	30708	0.73	58	618.362	35865	0.858405
AFPP_117M2	117	99aaef56-7410-41c3-a354-c91bee01af4b	66228	13266	4.98485	95_3	0.317	10	130	378.72	49233	0.74	71	820.901	58284	0.880051
AFPP_117M3	117	a2170988-c262-4064-8801-d21af93c2e03	63470	9241.5	6.87562	66_2	0.337	16	104	493.56	51330	0.81	94	589.117	55377	0.872491
AFPP_250M1	250	c62d8126-0c1e-4ae1-b4eb-41c7a28dd4b5	39589	9567	4.13662	22_2	0.452	10	64	502.64	32169	0.81	57	604.263	34443	0.870014
AFPP_250M2	250	8ce13887-d0f5-4b77-8bfb-f4b7f0076ae3	37398	6324	5.91129	1080_1	0.361	19	61	517.43	31563	0.84	55	600.436	33024	0.883042
AFPP_250M3	250	8434e78b-d3a1-47eb-b9f9-cd1ebaa93368	37132	6213	5.98117	219_4	0.397	16	66	432.95	28575	0.77	57	578.737	32988	0.888398
AFPP_250M4	250	e4f9aa7f-d307-4ea5-8344-a16ba564540e	37950	6455	5.87607	943_1	0.394	26	55	610.75	33591	0.89	40	866.325	34653	0.913123
AFPP_250M5	250	49851a02-6883-4dc7-bd20-74ff548a4bd9	38150	6405	5.9555	779_3	0.432	21	47	676.28	31785	0.83	42	776.143	32598	0.854469
AFPP_250M6	250	2e2a6d24-87e9-415f-8713-94ff345efaf3	37665	5385	6.98904	1021_1	0.401	12	65	472.57	30717	0.82	51	640.882	32685	0.867782
AFPP_250M7	250	8e7e7925-97dd-480d-9159-971569d2a72a	38157	7847	4.86046	1505_3	0.357	16	64	534.8	34227	0.9	49	704.388	34515	0.904552
AFPP_250M8	250	b296692d-c08d-43ec-9bcb-e6d35508d72d	37846	6359	5.95046	1524_1	0.411	20	50	598.02	29901	0.79	36	847	30492	0.805686
AFPP_250M9	250	e7e7c498-4c65-40f1-a37d-51a382426302	37895	5417.5	6.99068	1608_2	0.404	10	73	425.26	31044	0.82	49	676.286	33138	0.874469
AFPP_250M10	250	b45ce59a-47bd-41b4-8f52-5527f6f217b0	37943	6334	5.98611	1587_1	0.379	10	72	462.46	33297	0.88	54	666.944	36015	0.949187
AFPP_250M11	250	12d5d990-b91c-4c6a-b33d-420baad776c3	37784	6333	5.96826	1234_2	0.355	16	67	491.37	32922	0.87	57	589.105	33579	0.88871
AFPP_250M12	250	94bcf502-0e14-47f9-b9ba-9fb4949b529c	38078	6407	5.93367	1008_1	0.359	11	78	383.42	29907	0.79	53	638.038	33816	0.888072

## Sheet: README
Supplementary_Table_2.xls Statistics for 16 polished linear concatemer sequences obtained from three seawater samples.
Concatemer details, GC content, and coding sequence (CDS) information for each polished draft genome are indicated. Each genome was polished from the specified sequencing read.
